# Supplementary material for: A metal π-Lewis base activation model for Pd-catalyzed hydroamination of amines and 1,3-dienes
Source: Royal Society of Chemistry journal article supplement (doi:10.1039/d2sc05835a), 2023-01-01
Supplement: d2sc05835a1.pdf [file d2sc05835a1.pdf]

## Electronic Supplementary Information

for

### Metal $\pi$ -Lewis Base Activation Model in Pd-Catalyzed Hydroamination of Amine and 1,3-Dienes

Xiao Yan,<sup>†,§</sup> Xiu-Ming Yang,<sup>†,§</sup> Peng Yan,<sup>†,§</sup> Bo Zhao,<sup>†</sup> Rong Zeng,<sup>†</sup> Bin Pan,<sup>†</sup> Ying-chun Chen,<sup>†,‡</sup>  
Lei Zhu,<sup>\*,†</sup> and Qin Ouyang<sup>\*,†</sup>

<sup>†</sup>College of Pharmacy, Third Military Medical University, Shapingba, Chongqing 400038, China

<sup>‡</sup>Key Laboratory of Drug-Targeting and Drug Delivery System of the Ministry of Education and Sichuan Research Center for Drug Precision Industrial Technology, West China School of Pharmacy, Sichuan University, Chengdu 610041, China

<sup>§</sup>These authors contributed equally.

#### Table of Contents

|                                                                                                   |     |
|---------------------------------------------------------------------------------------------------|-----|
| 1. Alternative transition states structures in the $\pi$ -Lewis base activation step.....         | S2  |
| 2. Alternative transition states structures in the LLHT step.....                                 | S3  |
| 3. BEt <sub>3</sub> mediated generation Pd(II)-H species .....                                    | S3  |
| 4. The initial cycle of cationic Pd(II)- $\pi$ -allyl mediated Pd-catalyzed hydroamination.....   | S4  |
| 5. Alternative transition states structures for the oxidative protonation process .....           | S5  |
| 6. Neutral pathway for the Pd-catalyzed hydroamination of aliphatic amine with diene.....         | S6  |
| 7. The pre-activation of [Pd( $\pi$ -allyl)Cl] <sub>2</sub> in the neutral catalytic system ..... | S7  |
| 8. Control experiments .....                                                                      | S8  |
| 9. Detection the complex II and IV by <sup>1</sup> H NMR experiments .....                        | S10 |
| 10. Reaction scope of alkyl amine.....                                                            | S11 |
| 11. Complete References for Gaussian 09 .....                                                     | S11 |
| 12. Calculated energy and geometry for all intermediates and transition states .....              | S12 |

## 1. Alternative transition states structures in the $\pi$ -Lewis base activation step

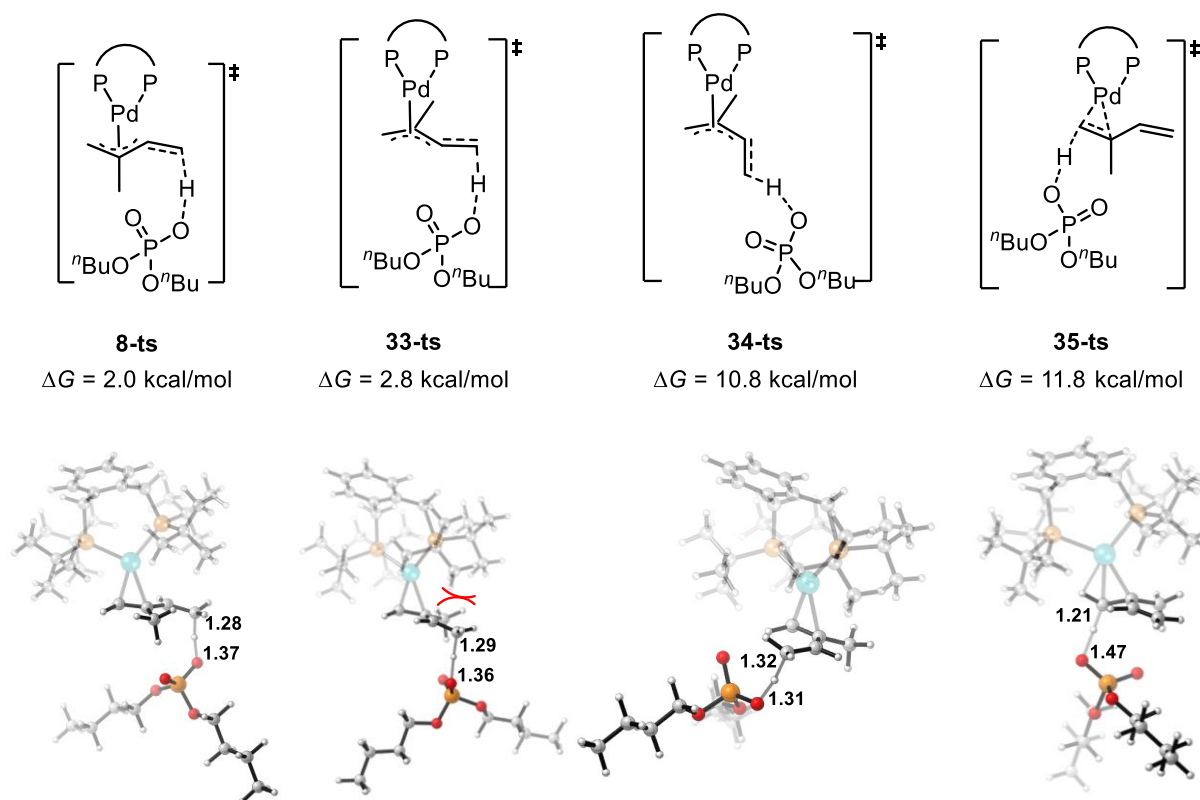

**Fig. S1.** The structure and energy difference of various  $\pi$ -Lewis base activation transition states in Pd-catalyzed hydroamination of indazoles with isoprene.

As shown in **Fig. S1**, alternative transition state structures in the  $\pi$ -Lewis base activation step were considered. Due to the steric hindrance between methyl at isoprene and ligand, the relative free energy of **33-ts** is 0.8 kcal/mol higher than that of **8-ts**. Meanwhile, the cis-conformation isoprene involved transition state **34-ts** is 8.8 kcal/mol higher than that of **8-ts**. In **35-ts**, phosphoric acid reacts with the adjacent carbon atom, and the relative free energy of **35-ts** is 9.8 kcal/mol higher than that of **8-ts**, indicating the vinylogy activation of diene is more favorable. It is consistent with the orbital analysis in Figure 2.

## 2. Alternative transition states structures in the LLHT step

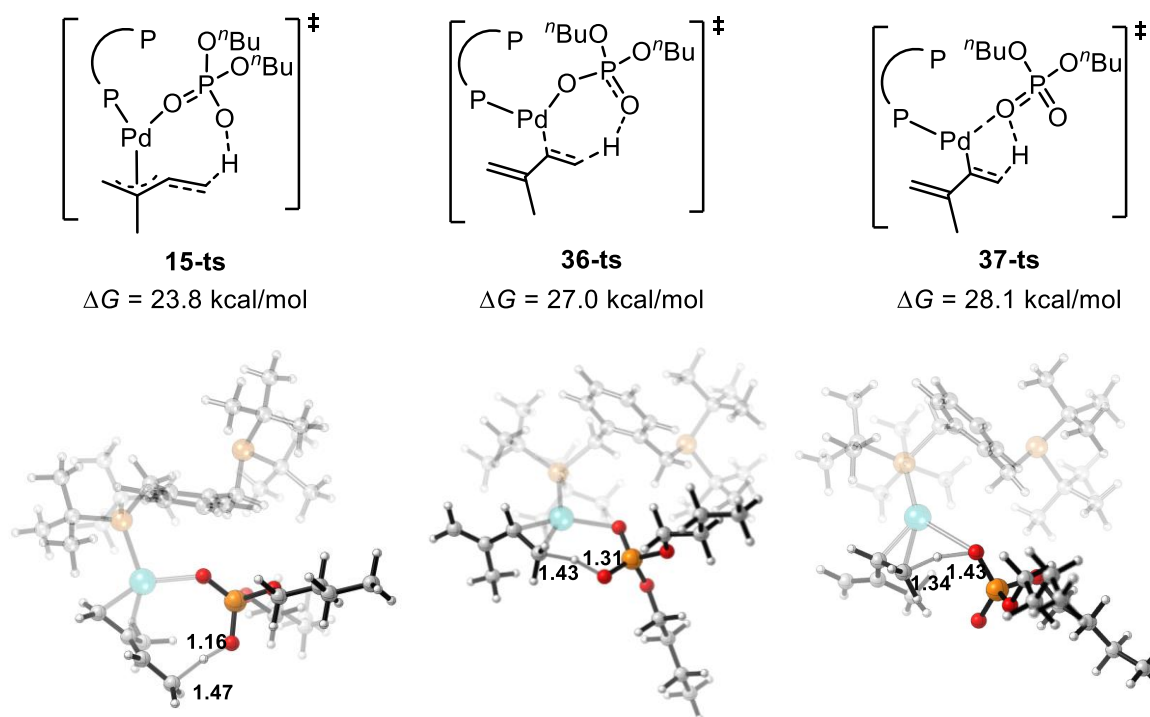

**Fig. S2.** The structure and energy difference of various LLHT transition state in Pd-catalyzed hydroamination of indazoles with isoprene.

As shown in **Fig. S2**, alternative transition state structures in the LLHT step were considered. Calculated results showed that all of these are much higher than that of **8-ts** for the  $\pi$ -Lewis base activation process.

## 3. $\text{BEt}_3$ mediated generation Pd(II)-H species

The ancillary Lewis acid  $\text{BEt}_3$  could facilitate the Pd(0)-catalyzed hydroamination of indazoles with isoprene to get  $N^1$ -functionalized product **3b** (**Scheme 2a**). For this Brønsted acid absent system, a  $\text{BEt}_3$  activating Pd(0) mechanism was proposed in the previous report. A small amount of  $\text{BEt}_3$  was expected to undergo oxidative addition with Pd(0) and the subsequent hydride elimination to deliver the  $\text{Et}_2\text{B-Pd(II)-H}$  species. To evaluate the possibility of this pathway, we have calculated the free energy profile. As shown in Figure S3, the activation free energy of this pathway is up to 66.9 kcal/mol (referring to **7**→**39-ts**). The extremely high activation free energy suggests this process is hard to occur in this reaction condition. Thus the possibility of the  $\text{BEt}_3$  mediated generation Pd(II)-H species pathway was excluded.

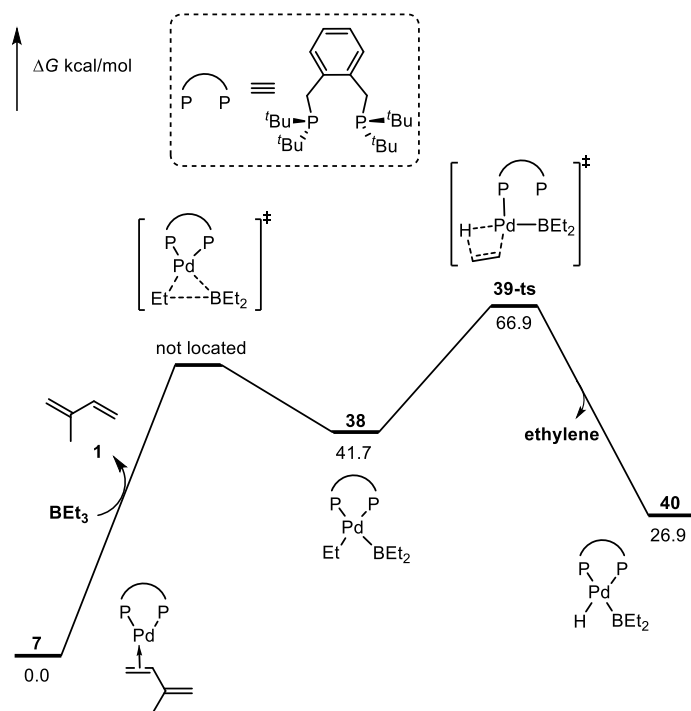

**Fig. S3.** Free energy profile of the pathway for  $\text{BEt}_3$  mediated generation  $\text{Pd(II)-H}$  species.

#### 4. The initial cycle of cationic $\text{Pd(II)-}\pi$ -allyl mediated $\text{Pd-catalyzed}$ hydroamination

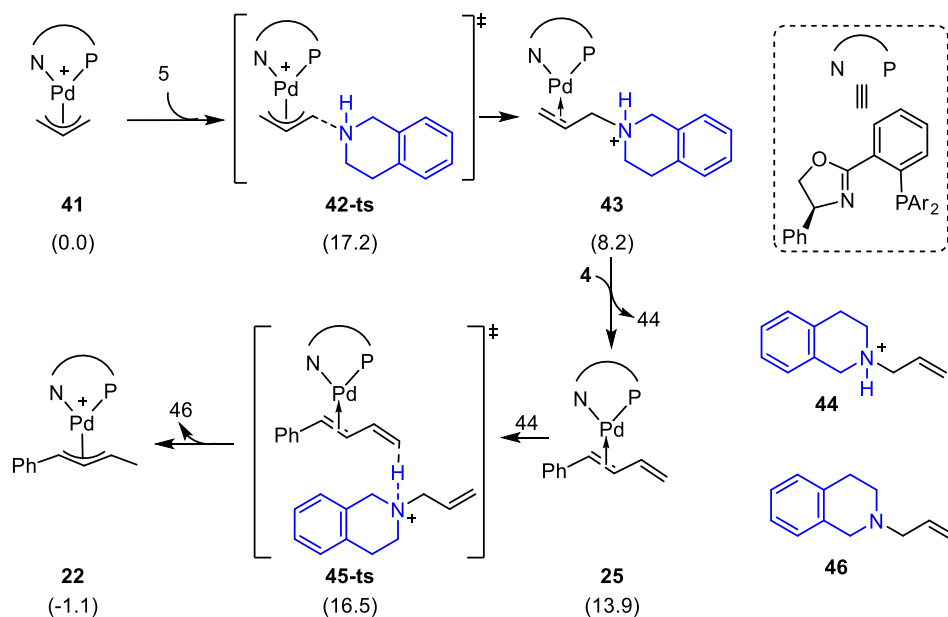

**Fig. S4.** The initial cycle of cationic  $\text{Pd(II)-}\pi$ -allyl mediated  $\text{Pd-catalyzed}$  hydroamination of aliphatic amine with diene. The data in parentheses represent the relative free energy, which is given in kcal/mol.

The main reaction mechanism of cationic  $\text{Pd(II)-}\pi$ -allyl mediated  $\text{Pd-catalyzed}$  hydroamination of aliphatic amine with diene was given in the text. The active complex **22** could be generated through

the initial cycle of cationic Pd(II)- $\pi$ -allyl mediated Pd-catalyzed hydroamination (Figure S4). The reaction starts from the amine **5** nucleophilic attack of the Pd(II)- $\pi$ -allyl species **41** to give Pd(0) complex **25** and quaternary ammonium salt cation **44**. Subsequently, the formation of Pd(II)- $\pi$ -allyl species **22** via the  $\pi$ -Lewis base activation process between **44** and **25**. The activation free energy for the initial cycle of cationic Pd(II)- $\pi$ -allyl mediated Pd-catalyzed hydroamination is 17.2 kcal/mol (referring to **41**→**42-ts**), indicating this process could proceed smoothly in the reaction condition.

### 5. Alternative transition states structures for the oxidative protonation process

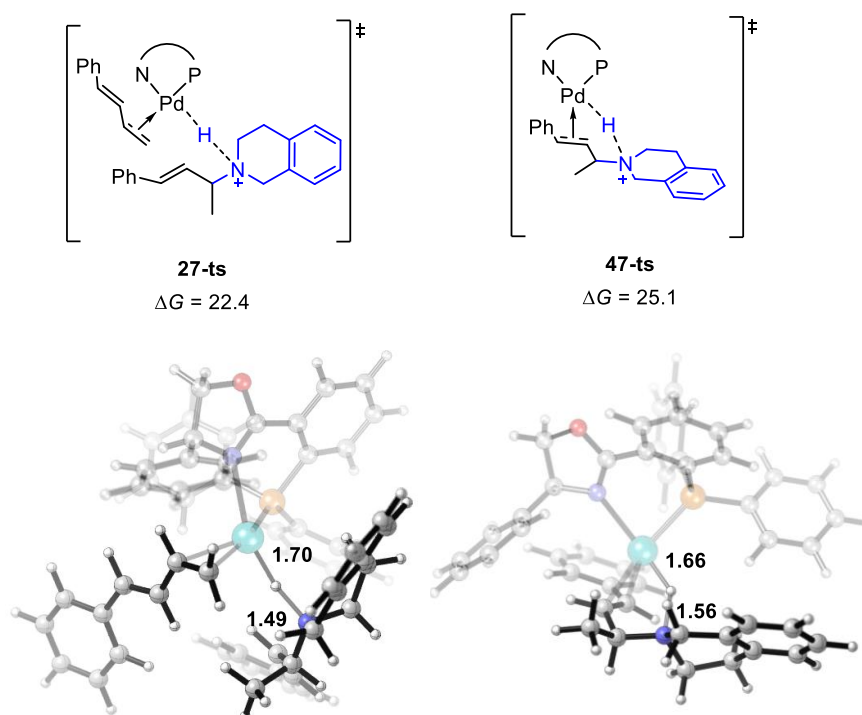

**Fig. S5.** The structure and energy of different transition states for the generation of Pd(II)-H species via the oxidative protonation process.

As shown in **Fig. S5**, alternative transition state structures in the generation of Pd(II)-H species via the oxidative protonation process were considered. Calculated results showed that all of these are much higher than that of **26-ts** for the  $\pi$ -Lewis base activation process.

## 6. Neutral pathway for the Pd-catalyzed hydroamination of aliphatic amine with diene

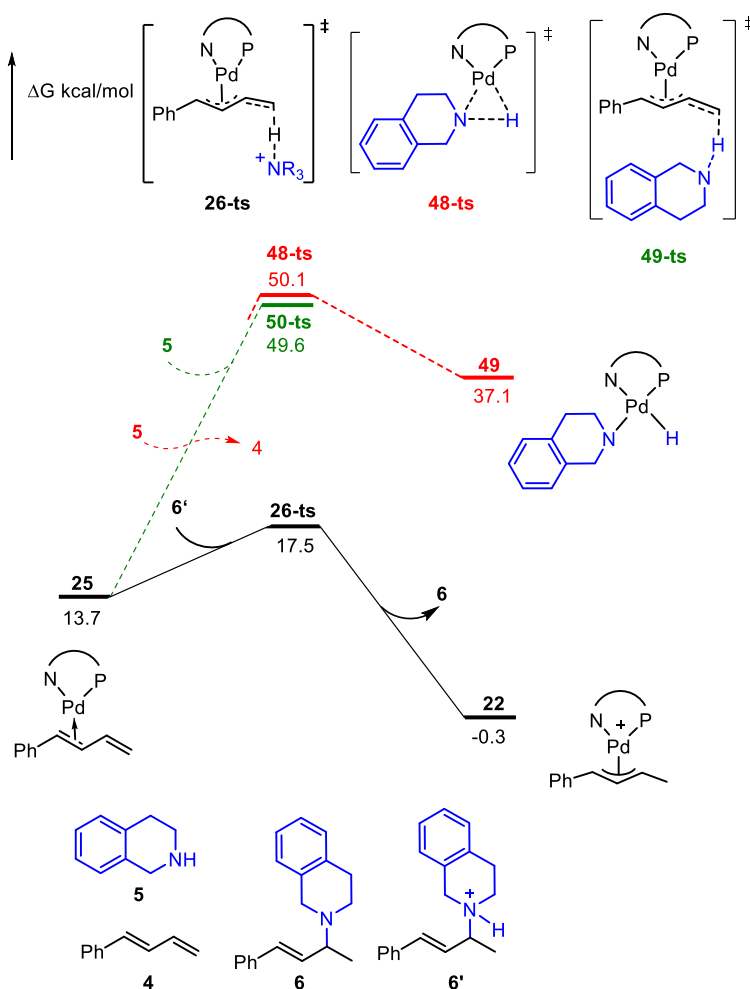

**Fig. S6.** Free energy profile of the neutral pathway for the Pd-catalyzed hydroamination of aliphatic amine with diene.

Neutral aliphatic amine **5** direct oxidation addition with Pd complexes in hydroamination reaction was discussed. As shown in Figure S6, calculated results show that the energy barrier of oxidation addition with neutral amine **5** is up to 50.1 kcal/mol (referring to **25**→**48-ts**). It suggests that the neutral amine **5** is insufficient to oxidize Pd(0) species. Moreover, the aliphatic amine **5** involved  $\pi$ -Lewis base activation process needs to overcome a high energy barrier of 49.6 kcal/mol (referring to **25**→**50-ts**). These results emphasize the critical role of the cationic Pd(II) pre-catalyst triggered ammonium salt **6'**.

## 7. The pre-activation of $[\text{Pd}(\pi\text{-allyl})\text{Cl}]_2$ in the neutral catalytic system

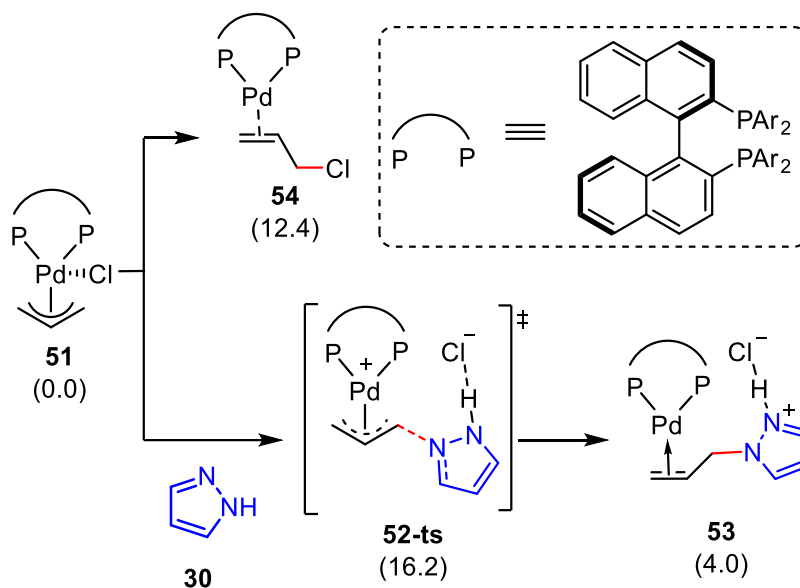

**Fig. S7.** The pre-activation of  $[\text{Pd}(\pi\text{-allyl})\text{Cl}]_2$  in the neutral catalytic system. The data in parentheses represent the relative free energy, which is given in kcal/mol.

In addition, the neutral  $[\text{Pd}(\pi\text{-allyl})\text{Cl}]_2$  catalyst was also sufficient to mediate hydroamination reactions. Based on the above results, we anticipated that the pyrazole hydrochloride generated through reductive elimination with pyrazole could serve as an initial electrophile of the  $\pi$ -Lewis base activation mode. To validate this issue, we have calculated the pre-activation of  $[\text{Pd}(\pi\text{-allyl})\text{Cl}]_2$  in this neutral catalytic system. As shown in Figure S7,  $[\text{Pd}(\pi\text{-allyl})\text{Cl}]_2$  **51** could directly afford allyl chloride (**54**) with an endothermic by 12.4 kcal/mol. However, the formation of pyrazole hydrochloride **53** via **52-ts** is only endothermic by 4.0 kcal/mol. It suggests that the formation of pyrazole hydrochloride **53** is more thermodynamically favorable. And the generated pyrazole hydrochloride could drive the catalytic cycle via the  $\pi$ -Lewis base activation process to obtain desired hydroaminated products.

## 8. Control experiments

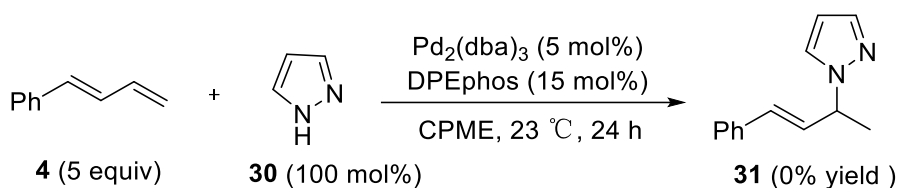

When the catalyst was changed from [Pd( $\eta^3$ -C<sub>3</sub>H<sub>5</sub>)Cl]<sub>2</sub> to Pd<sub>2</sub>(dba)<sub>3</sub>, the reaction could not proceed normally and no target product was detected. The detailed operations are as follows:

**Procedure:** In a N<sub>2</sub>-filled glovebox, an oven dried vial equipped with a magnetic stir bar was charged with Pd<sub>2</sub>(dba)<sub>3</sub> (9.2 mg, 0.01 mmol), DPEphos (16.2 mg, 0.03 mmol) and CPME (1.0 mL). The resulting mixture was stirred for 10 mins and then (*E*)-buta-1,3-dien-1-ylbenzene **4** (130.2 mg, 140.2  $\mu$ L, 1.0 mmol) followed by a solution of freshly recrystallized pyrazole **30** (13.6 mg, 0.2 mmol) in CPME (1.0 mL) were added dropwise. The mixture was removed from the glovebox and stirred at 23 °C for 24 h. TLC and <sup>1</sup>H-NMR analysis showed that no target product **31** was formed.

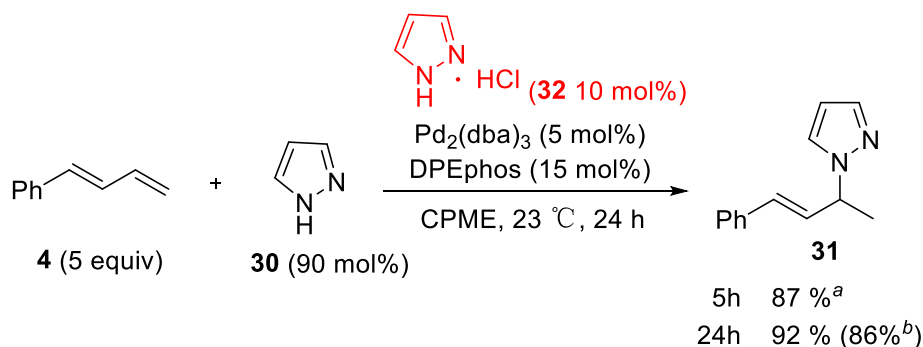

<sup>a</sup>The yield was determined by <sup>1</sup>H-NMR with mesitylene as the internal standard.

<sup>b</sup>isolated yield.

However, when a catalytic amount of pyrazole hydrochloride **32** was added, the reaction was back on track and the target product was obtained in a high isolated yield of 87%. Increasing the reaction time to 24 hours could obtain a slightly higher yield of 92% (86% isolated yield). The detailed operations are as follows:

**Procedure:** In a N<sub>2</sub>-filled glovebox, an oven dried vial equipped with a magnetic stir bar was charged with Pd<sub>2</sub>(dba)<sub>3</sub> (9.2 mg, 0.01 mmol), DPEphos (16.2 mg, 0.03 mmol) and CPME (1.0 mL). The resulting mixture was stirred for 10 mins and then (*E*)-buta-1,3-dien-1-ylbenzene **4** (130.2 mg, 140.2  $\mu$ L, 1.0 mmol) followed by a solution of freshly recrystallized pyrazole **30** (12.3 mg, 0.18 mmol) and pyrazole hydrochloride **32** (2.1 mg, 0.02 mmol) in CPME (1.0 mL) were added dropwise. The mixture was removed from the glovebox and stirred at 23 °C until no starting material was



observed by TLC. After completion, the mixture was concentrated and purified by flash chromatography on silica gel (EtOAc:petroleum ether = 1:10) to give the product **31** (34.1 mg, 0.172 mmol), as a white solid, yielding 86%. The structure of product **31** was identified by comparison with the NMR spectra of the previous report (*Angew. Chem. Int. Ed.* **2021**, *60*, 19660).

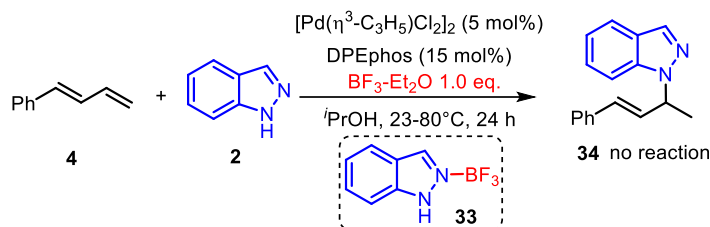

Moreover, when 1.0 equiv  $\text{BF}_3$  additive was added, the neutral  $[\text{Pd}(\pi\text{-allyl)Cl}]_2$  catalyzed hydroamination of indazole **2** was completely quenched at  $23^\circ\text{C}$  or  $80^\circ\text{C}$ . We speculate that the combination of **2** and  $\text{BF}_3$  generates Lewis acid-base adduct **33**. So that the reductive amination of indazole **2** and  $[\text{Pd}(\pi\text{-allyl)Cl}]_2$  was inhibited, and the active  $\text{Pd}(0)$ -intermediate cannot generate to realize the catalytic process.

**Procedure:** In a  $\text{N}_2$ -filled glovebox, an oven dried vial equipped with a magnetic stir bar was charged with  $[\text{Pd}(\pi\text{-allyl)Cl}]_2$  (1.83mg, 0.005 mmol), DPEphos (8.1 mg, 0.015 mmol) and  $i\text{PrOH}$  (0.50 mL). The resulting mixture was stirred for 10 mins and then (*E*)-buta-1,3-dien-1-ylbenzene **4** (56  $\mu\text{L}$ , 0.4 mmol) followed by a solution of freshly recrystallized indazole **2** (23.6 mg, 0.2 mmol) and  $\text{BF}_3\text{-Et}_2\text{O}$  (46.5%, 0.2mmol, 25 $\mu\text{L}$ ) in  $i\text{PrOH}$  (0.50 mL) were added dropwise. The mixture was removed from the glovebox and stirred at  $80^\circ\text{C}$  until no starting material was observed by TLC. The structure of product **34** was identified by comparison with the NMR spectra of the previous report (*Org. Lett.* **2022**, *24*, 2452).

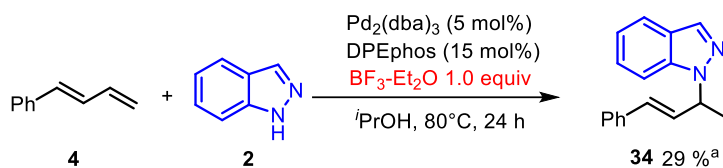

Meanwhile, the controlled trial (Fig 7e) showed that the corresponding transformation can proceed smoothly when  $\text{Pd}(0)$ -catalyst ( $\text{Pd}_2(\text{dba})_3$ , 5 mol %) was used. It suggests that the  $\text{BF}_3$  additive only intervenes in the reductive amination process. On the other hand, it can facilitate the  $\text{Pd}(0)$ -catalyzed hydroamination as a Lewis acid co-catalyst.

**Procedure:** In a  $\text{N}_2$ -filled glovebox, an oven dried vial equipped with a magnetic stir bar was charged with  $\text{Pd}_2(\text{dba})_3$  (9.2 mg, 0.01 mmol), DPEphos (16.2 mg, 0.03 mmol) and  $i\text{PrOH}$  (0.50 mL). The resulting mixture was stirred for 10 mins and then (*E*)-buta-1,3-dien-1-ylbenzene **4** (140  $\mu\text{L}$ , 1

mmol) followed by a solution of freshly recrystallized indazole **2** (23.6 mg, 0.2 mmol) and  $\text{BF}_3\text{-Et}_2\text{O}$  (46.5%, 0.2mmol, 25 $\mu\text{L}$ ) in  $^i\text{PrOH}$  (0.50 mL) were added dropwise. The mixture was removed from the glovebox and stirred at 80  $^\circ\text{C}$  until no starting material was observed by TLC. The structure of product **34** was identified by comparison with the NMR spectra of the previous report (*Org. Lett.* **2022**, *24*, 2452).

The above control experiments demonstrate that the in situ generated pyrazole hydrochloride is the key to this Pd-catalyzed hydroamination, which is corroborate with our calculation results.

## 9. Detection the complex **II** and **IV** by $^1\text{H}$ NMR experiments

we have found the interaction of 1,3-diene with Pd(0)-catalyst via  $^1\text{H}$  NMR experiments. As shown below, The  $^1\text{H}$  NMR experiments showed that the diene moiety in **4** experienced apparent high-field shifts when Pd(0)-catalyst and ligand were added, potentially supporting the electron-donating effect of Pd(0) in 1,3-diene coordinated  $\eta^2$ -Pd(0)-complex (**II**) (The similar phenomenon was observed in our previous report: *J. Am. Chem. Soc.*, 2021, **143**, 4809). These results provide reliable evidence for the HOMO-raised  $\eta^2$ -complexes with Pd(0) achieving  $\pi$ -Lewis base activation.

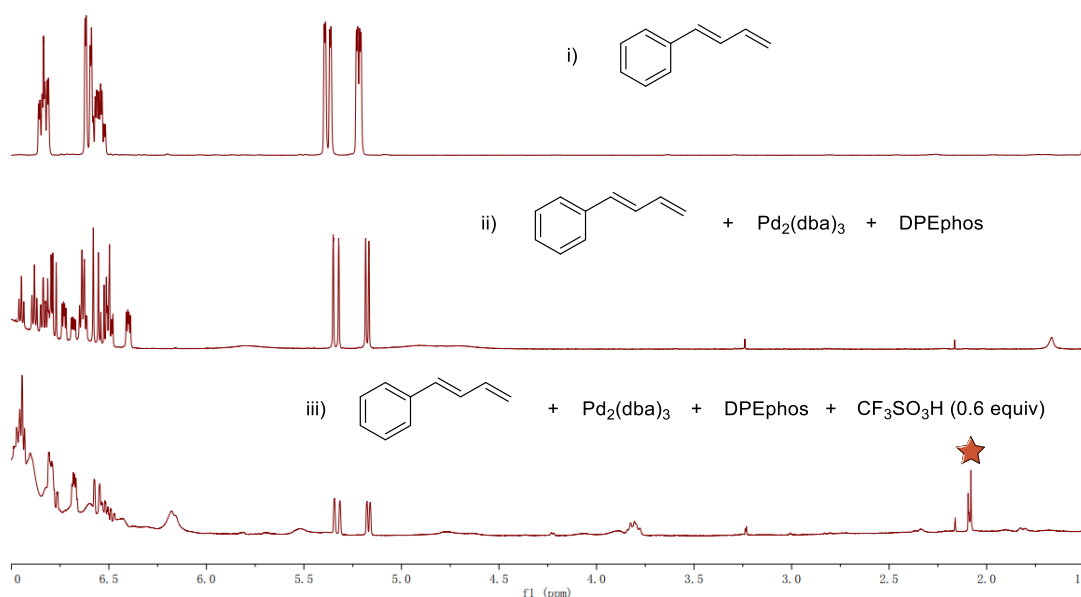

**Fig. S8** The  $^1\text{H}$  NMR experiments of 1,3-diene **4** with adding  $\text{Pd}_2(\text{dba})_3$ , DPEphos, and  $\text{CF}_3\text{SO}_3\text{H}$  to trace the **complex IV**.

Complex **III** was considered a transition state, so it cannot be detected by experimental methods. Pd- $\pi$ -allyl complex **IV** is well known in the Pd-catalyzed reactions. We also try to detect Pd- $\pi$ -allyl complex **IV** in the reaction system. The  $^1\text{H}$  NMR experiments showed that when Brønsted acid  $\text{CF}_3\text{SO}_3\text{H}$  is added, the characteristic signal for the alkyl group was apparently observed. We

speculate this could be methyl of Pd- $\pi$ -allyl complex **IV**. This result provides reliable evidence for the Pd- $\pi$ -allyl complex **IV** could potentially be considered as the reaction intermediate.

## 10. Reaction scope of alkyl amine

we have evaluated the reactivity of simple alkyl amine with our developed Pd(0)-catalyzed hydroamination of 1,3-diene. The reaction result showed that alkyl amine **35** exhibits lower reactivity compared with pyrazole. It's worth noting that this reaction could proceed with the assistance of pyrazole hydrochloride so that the preparation of other hydrochloride is unnecessary. Moreover, the yield of this reaction can be raised to 74% in the presence of the AgPF<sub>6</sub> additive.

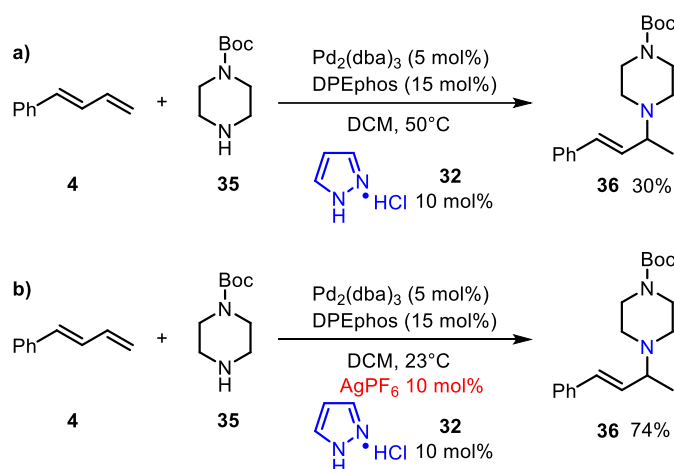

**Fig. S9** The reaction scope of alkyl amine.

**Procedure:** In a N<sub>2</sub>-filled glovebox, an oven dried vial equipped with a magnetic stir bar was charged with Pd<sub>2</sub>(dba)<sub>3</sub> (9.2 mg, 0.01 mmol), DPEphos (16.2 mg, 0.03 mmol) and DCM (0.5 mL). The resulting mixture was stirred for 10 mins and then (*E*)-buta-1,3-dien-1-ylbenzene **4** (130.2 mg, 140.2  $\mu$ L, 1.0 mmol) followed by a solution of freshly recrystallized piperazine **35** (37.2 mg, 0.2 mmol) and pyrazole hydrochloride **32** (2.1 mg, 0.02 mmol) in DCM (1.0 mL) were added dropwise. The mixture was removed from the glovebox and stirred at 50 °C until no starting material was observed by TLC. The structure of product **36** was identified by comparison with the NMR spectra of the previous report (*J. Am. Chem. Soc.* **2017**, *139*, 7180).

## 11. Complete References for Gaussian 09

Gaussian 09, Revision D.01, Frisch, M. J.; Trucks, G. W.; Schlegel, H. B.; Scuseria, G. E.; Robb, M. A.; Cheeseman, J. R.; Scalmani, G.; Barone, V.; Mennucci, B.; Petersson, G. A.; Nakatsuji, H.; Caricato, M.; Li, X.; Hratchian, H. P.; Izmaylov, A. F.; Bloino, J.; Zheng, G.; Sonnenberg, J. L.;

Hada, M.; Ehara, M.; Toyota, K.; Fukuda, R.; Hasegawa, J.; Ishida, M.; Nakajima, T.; Honda, Y.; Kitao, O.; Nakai, H.; Vreven, T.; Montgomery, Jr., J. A.; Peralta, J. E.; Ogliaro, F.; Bearpark, M.; Heyd, J. J.; Brothers, E.; Kudin, K. N.; Staroverov, V. N.; Kobayashi, R.; Normand, J.; Raghavachari, K.; Rendell, A.; Burant, J. C.; Iyengar, S. S.; Tomasi, J.; Cossi, M.; Rega, N.; Millam, N. J.; Klene, M.; Knox, J. E.; Cross, J. B.; Bakken, V.; Adamo, C.; Jaramillo, J.; Gomperts, R.; Stratmann, R. E.; Yazyev, O.; Austin, A. J.; Cammi, R.; Pomelli, C.; Ochterski, J. W.; Martin, R. L.; Morokuma, K.; Zakrzewski, V. G.; Voth, G. A.; Salvador, P.; Dannenberg, J. J.; Dapprich, S.; Daniels, A. D.; Farkas, Ö.; Foresman, J. B.; Ortiz, J. V.; Cioslowski, J.; Fox, D. J. Gaussian, Inc., Wallingford CT, 2013.

## 12. Calculated energy and geometry for all intermediates and transition states

|                                                    |                    |                    |                   |                                                    |                    |                    |                   |
|----------------------------------------------------|--------------------|--------------------|-------------------|----------------------------------------------------|--------------------|--------------------|-------------------|
| <b>1</b>                                           | C                  | 2.23453700         | 0.09315200        | 0.00000000                                         |                    |                    |                   |
| Zero-point correction= 0.114116 (Hartree/Particle) | C                  | 1.74836100         | 1.42296900        | 0.00000000                                         |                    |                    |                   |
| Thermal correction to Energy= 0.119951             | C                  | 0.38851900         | 1.68815000        | 0.00000000                                         |                    |                    |                   |
| Thermal correction to Enthalpy= 0.120895           | C                  | -1.92804400        | 0.43453100        | 0.00000000                                         |                    |                    |                   |
| Thermal correction to Gibbs Free Energy= 0.085640  | H                  | 1.75688100         | -2.01457300       | 0.00000000                                         |                    |                    |                   |
| E(solv) = -195.38939962                            | H                  | 3.30803100         | -0.07587900       | 0.00000000                                         |                    |                    |                   |
| C                                                  | 0.65954100         | 1.40247800         | 0.00007100        | H                                                  | 2.45934000         | 2.24429900         | 0.00000000        |
| C                                                  | 0.51598000         | -0.10056500        | -0.00007700       | H                                                  | 0.02030400         | 2.71053300         | 0.00000000        |
| H                                                  | 0.18162900         | 1.84598300         | -0.88273700       | H                                                  | -2.69865300        | 1.19440500         | 0.00000000        |
| H                                                  | 0.17795400         | 1.84634200         | 0.88060300        | N                                                  | -2.26949000        | -0.84183900        | 0.00000000        |
| H                                                  | 1.71227800         | 1.69922300         | 0.00218900        | N                                                  | -1.10006500        | -1.53633600        | 0.00000000        |
| C                                                  | 1.58984500         | -0.90969300        | -0.00012100       | <u>H</u>                                           | <u>-1.13680800</u> | <u>-2.54366200</u> | <u>0.00000000</u> |
| H                                                  | 2.60314500         | -0.51765200        | 0.00011800        | <b>3a</b>                                          |                    |                    |                   |
| H                                                  | 1.48668400         | -1.99204000        | 0.00009500        | Zero-point correction= 0.236593 (Hartree/Particle) |                    |                    |                   |
| C                                                  | -0.83343700        | -0.67948900        | 0.00015600        | Thermal correction to Energy= 0.249038             |                    |                    |                   |
| C                                                  | -1.98629500        | 0.00466400         | -0.00006200       | Thermal correction to Enthalpy= 0.249983           |                    |                    |                   |
| H                                                  | -2.02058600        | 1.09056200         | -0.00014600       | Thermal correction to Gibbs Free Energy= 0.197293  |                    |                    |                   |
| H                                                  | -2.94379200        | -0.50785400        | -0.00016700       | E(solv)= -575.39747912                             |                    |                    |                   |
| <u>H</u>                                           | <u>-0.87112000</u> | <u>-1.76892700</u> | <u>0.00024700</u> | H                                                  | -3.46392000        | 0.56300000         | 2.09960100        |
| <b>2</b>                                           |                    |                    |                   |                                                    |                    |                    |                   |
| Zero-point correction= 0.118564 (Hartree/Particle) | C                  | -2.37236100        | 0.03882300        | -2.01262800                                        |                    |                    |                   |
| Thermal correction to Energy= 0.124689             | C                  | -2.79690800        | -0.18875100       | -0.58223800                                        |                    |                    |                   |
| Thermal correction to Enthalpy= 0.125633           | H                  | -2.39019100        | 1.10627400        | -2.27303400                                        |                    |                    |                   |
| Thermal correction to Gibbs Free Energy= 0.088311  | H                  | -1.34751900        | -0.31402100       | -2.17855700                                        |                    |                    |                   |
| E(solv)= -379.98585428                             | H                  | -3.03097400        | -0.49075700       | -2.70698300                                        |                    |                    |                   |
| C                                                  | -0.50801500        | 0.60256100         | 0.00000000        | C                                                  | -3.79882200        | -1.01237400        | -0.26426500       |
| C                                                  | 0.00000000         | -0.72265000        | 0.00000000        | H                                                  | -4.34691300        | -1.54646400        | -1.03594400       |
| C                                                  | 1.37760700         | -0.99669700        | 0.00000000        | H                                                  | -4.10809600        | -1.19826500        | 0.75854100        |
|                                                    |                    |                    |                   | C                                                  | -2.03570400        | 0.61895900         | 0.46447600        |

|          |                    |                    |                   |
|----------|--------------------|--------------------|-------------------|
| C        | -2.40614700        | 0.34517100         | 1.92469500        |
| H        | -2.20514900        | -0.69764300        | 2.18197700        |
| H        | -1.81025700        | 0.98446400         | 2.58336800        |
| H        | -2.20993200        | 1.68254600         | 0.25040600        |
| C        | 1.56696200         | 0.79660100         | -0.06002600       |
| C        | 1.27470300         | -0.58365600        | 0.21530600        |
| C        | 2.31523800         | -1.54734600        | 0.24205400        |
| C        | 3.59884500         | -1.11540000        | -0.00253100       |
| C        | 3.89178800         | 0.25535500         | -0.27633500       |
| C        | 2.90045500         | 1.21011300         | -0.30827900       |
| C        | 0.31664500         | 1.42026500         | -0.00218800       |
| H        | 2.08913300         | -2.58859100        | 0.45049600        |
| H        | 4.41732100         | -1.83041800        | 0.01133400        |
| H        | 4.92301500         | 0.54306100         | -0.46253400       |
| H        | 3.13276800         | 2.25104900         | -0.51723400       |
| H        | 0.01171800         | 2.44769200         | -0.13940600       |
| N        | -0.58193000        | 0.44652400         | 0.28365800        |
| <u>N</u> | <u>-0.04509300</u> | <u>-0.78059200</u> | <u>0.42344600</u> |

3b

Zero-point correction=0.236598 (Hartree/Particle)  
 Thermal correction to Energy=0.249124  
 Thermal correction to Enthalpy=0.250068  
 Thermal correction to Gibbs Free Energy=0.196789  
 E(Solv)= -575.40256649

|   |             |             |             |
|---|-------------|-------------|-------------|
| C | 2.11670700  | -0.56320900 | -1.94419700 |
| C | 2.61121600  | -0.32242900 | -0.53841200 |
| H | 1.63381400  | -1.54575700 | -2.03759300 |
| H | 1.37010400  | 0.18657700  | -2.23143400 |
| H | 2.93910800  | -0.51855000 | -2.66414800 |
| C | 3.88111700  | 0.00268400  | -0.28275600 |
| H | 4.60459400  | 0.10076300  | -1.08794100 |
| H | 4.25109800  | 0.19268500  | 0.71902100  |
| C | 1.57272900  | -0.51725100 | 0.56313300  |
| C | 2.04749300  | -0.22215400 | 1.99008400  |
| H | 2.34581600  | 0.82543500  | 2.08566000  |
| H | 2.89418000  | -0.86103000 | 2.25941200  |
| H | 1.24898600  | -1.56574900 | 0.51573800  |
| C | -1.72952100 | 0.96371000  | -0.08696300 |
| C | -0.93469000 | -0.18989300 | 0.14729900  |
| C | -1.50163000 | -1.47557700 | 0.21558700  |
| C | -2.87368500 | -1.57326400 | 0.04275800  |
| C | -3.67915800 | -0.43309400 | -0.19308000 |
| C | -3.12040800 | 0.83258100  | -0.25964500 |

|          |                   |                    |                   |
|----------|-------------------|--------------------|-------------------|
| C        | -0.79103200       | 2.03822800         | -0.07973200       |
| H        | -0.89849600       | -2.36009500        | 0.39710200        |
| H        | -3.34450200       | -2.55156900        | 0.08997300        |
| H        | -4.75024100       | -0.55965600        | -0.32256000       |
| H        | -3.74025900       | 1.70670500         | -0.44042900       |
| H        | -0.97207800       | 3.09608600         | -0.22187100       |
| N        | 0.43949300        | 1.60667000         | 0.13364100        |
| N        | 0.35894900        | 0.25426600         | 0.26608500        |
| <u>H</u> | <u>1.23396000</u> | <u>-0.41437700</u> | <u>2.69653600</u> |

4

Zero-point correction= 0.167365 (Hartree/Particle)  
 Thermal correction to Energy= 0.176323  
 Thermal correction to Enthalpy= 0.177268  
 Thermal correction to Gibbs Free Energy= 0.132588  
 E(solv)= -387.20701714

|          |                    |                   |                   |
|----------|--------------------|-------------------|-------------------|
| C        | -0.89639100        | -0.66149100       | -0.00011300       |
| C        | -1.98196100        | 0.14281400        | 0.00003100        |
| H        | -1.06886200        | -1.73856300       | -0.00028400       |
| H        | -1.86416800        | 1.22590300        | 0.00022200        |
| C        | -3.34610600        | -0.35165400       | -0.00004200       |
| C        | -4.43904200        | 0.42949000        | 0.00011300        |
| H        | -3.46700500        | -1.43551200       | -0.00024500       |
| C        | 0.51375100         | -0.26592200       | -0.00006000       |
| C        | 1.50040000         | -1.27030700       | 0.00003000        |
| C        | 0.94328900         | 1.07659900        | -0.00010500       |
| C        | 2.85755500         | -0.95313300       | 0.00009600        |
| H        | 1.19080700         | -2.31303800       | 0.00005800        |
| C        | 2.29795800         | 1.39403300        | -0.00003700       |
| H        | 0.21127000         | 1.87888100        | -0.00021500       |
| C        | 3.26380800         | 0.38210600        | 0.00006700        |
| H        | 3.59745400         | -1.74924200       | 0.00016700        |
| H        | 2.60440100         | 2.43689800        | -0.00007100       |
| H        | 4.32067700         | 0.63430000        | 0.00011400        |
| H        | -5.44056300        | 0.01050500        | 0.00005400        |
| <u>H</u> | <u>-4.36358500</u> | <u>1.51466000</u> | <u>0.00031800</u> |

5

Zero-point correction= 0.183110 (Hartree/Particle)  
 Thermal correction to Energy= 0.190826  
 Thermal correction to Enthalpy= 0.191771  
 Thermal correction to Gibbs Free Energy= 0.150823  
 E(solv) = -404.49274818

|   |             |            |             |
|---|-------------|------------|-------------|
| C | -1.18463300 | 1.45974300 | -0.04489200 |
|---|-------------|------------|-------------|

|   |             |             |             |
|---|-------------|-------------|-------------|
| C | 0.12353900  | 0.69091400  | 0.00165400  |
| C | 0.13143100  | -0.71314000 | 0.04183200  |
| C | -1.17190100 | -1.48764900 | 0.10214800  |
| C | -2.36057700 | -0.62953100 | -0.33739800 |
| H | 1.32781000  | 2.47376400  | -0.06960800 |
| H | -1.32190000 | 1.84418900  | -1.07721500 |
| C | 1.33928200  | 1.38564500  | -0.03874400 |
| C | 1.36108500  | -1.38627500 | 0.04265700  |
| H | -1.10476700 | -2.38948100 | -0.52002300 |
| H | -3.30152100 | -1.13704600 | -0.09852300 |
| C | 2.56668500  | -0.68943200 | 0.00475900  |
| C | 2.55592500  | 0.70737800  | -0.03637700 |
| H | 1.36672100  | -2.47427100 | 0.07210300  |
| H | 3.50901200  | -1.23103300 | 0.00508200  |
| H | 3.48940900  | 1.26329600  | -0.06382000 |
| N | -2.30838000 | 0.63521200  | 0.39534300  |
| H | -3.17459900 | 1.15231900  | 0.26527100  |
| H | -1.11914800 | 2.33886600  | 0.60848500  |
| H | -2.33015300 | -0.48953000 | -1.43641000 |
| H | -1.34721700 | -1.82346800 | 1.13342700  |

6

Zero-point correction= 0.243101 (Hartree/Particle)

Thermal correction to Energy= 0.256411

Thermal correction to Enthalpy= 0.257355

Thermal correction to Gibbs Free Energy= 0.200191

E(Solv)= -613.52886444

|   |             |             |             |
|---|-------------|-------------|-------------|
| C | 3.80322000  | -1.51756500 | -0.57991900 |
| C | 2.51082900  | -1.00182400 | -0.61655200 |
| C | 2.20941500  | 0.23764100  | -0.02064200 |
| C | 3.25404600  | 0.93133200  | 0.61578500  |
| C | 4.54939100  | 0.41632600  | 0.65347200  |
| C | 4.83073000  | -0.81183800 | 0.05422400  |
| H | 4.01090100  | -2.47718700 | -1.04624800 |
| H | 1.72771400  | -1.57131400 | -1.10849800 |
| H | 3.04237400  | 1.88953300  | 1.08530700  |
| H | 5.33756800  | 0.97482100  | 1.15159700  |
| H | 5.83803200  | -1.21829700 | 0.08170200  |
| C | 0.86491100  | 0.83844800  | -0.02836400 |
| H | 0.78972400  | 1.76999000  | 0.53003100  |
| C | -0.22993500 | 0.36691900  | -0.64329700 |
| H | -0.17612000 | -0.56296100 | -1.20768800 |
| C | -1.60564200 | 1.00077600  | -0.63611800 |
| C | -1.69215600 | 2.34178800  | 0.11792600  |

|   |             |             |             |
|---|-------------|-------------|-------------|
| H | -1.45265800 | 2.21130200  | 1.17818500  |
| H | -1.00127900 | 3.07741000  | -0.30839100 |
| H | -1.86813400 | 1.19977700  | -1.68938500 |
| C | -3.87142200 | -1.48727300 | 0.94709700  |
| C | -2.59035600 | -0.89061900 | 0.93644500  |
| C | -2.62445600 | 0.01368700  | -0.11355500 |
| N | -3.87620200 | -0.09850100 | -0.64273500 |
| H | -4.25332400 | -2.25042400 | 1.61309400  |
| H | -1.75359100 | -1.08632900 | 1.59105200  |
| N | -4.65677600 | -1.00664800 | -0.01609700 |
| H | -2.70663100 | 2.74800300  | 0.05357800  |
| H | -4.25517600 | 0.40493200  | -1.43151300 |

7

Zero-point correction= 0.750691 (Hartree/Particle)

Thermal correction to Energy= 0.792039

Thermal correction to Enthalpy= 0.792983

Thermal correction to Gibbs Free Energy= 0.681307

E(solvent)= -1947.68693849

|    |             |             |             |
|----|-------------|-------------|-------------|
| Pd | -0.40337300 | -0.95832000 | -0.49870200 |
| P  | 1.87911400  | -0.75359000 | 0.23858700  |
| P  | -1.54384200 | 0.99473500  | 0.32848600  |
| C  | 2.32495500  | 0.84139500  | 1.17855600  |
| C  | 2.07505900  | 2.19682500  | 0.54366800  |
| C  | 3.18022600  | 2.91197200  | 0.04904300  |
| C  | 3.07078700  | 4.19294100  | -0.48502300 |
| C  | 1.82485500  | 4.81551900  | -0.50276800 |
| C  | 0.72670400  | 4.14274600  | 0.02503700  |
| C  | 0.81101500  | 2.83718200  | 0.54151000  |
| C  | -0.43157700 | 2.27012700  | 1.20042100  |
| C  | 3.16153700  | -0.83237400 | -1.20806000 |
| C  | 2.57763400  | 0.06145100  | -2.32708400 |
| C  | 4.58924000  | -0.34751400 | -0.88919900 |
| C  | 3.25454800  | -2.27404400 | -1.74959800 |
| C  | 2.37070800  | -2.05603000 | 1.59539300  |
| C  | 1.63220700  | -1.68703500 | 2.90209900  |
| C  | 3.87531800  | -2.15776700 | 1.90924900  |
| C  | 1.84801900  | -3.44297700 | 1.16488600  |
| C  | -2.41252100 | 2.00385400  | -1.07408300 |
| C  | -1.32370900 | 2.25925500  | -2.14318800 |
| C  | -3.04111600 | 3.34096600  | -0.64220500 |
| C  | -3.50139100 | 1.14502600  | -1.75141100 |
| C  | -2.77148700 | 0.68570400  | 1.80222400  |
| C  | -3.14853800 | 1.92632700  | 2.63852700  |

|   |             |             |             |                                          |                |                    |             |
|---|-------------|-------------|-------------|------------------------------------------|----------------|--------------------|-------------|
| C | -4.06822200 | 0.02004900  | 1.30092500  | H                                        | -1.12993300    | 0.08057500         | 3.15081900  |
| C | -2.05955100 | -0.32089300 | 2.73240100  | H                                        | -2.71765200    | -0.56401800        | 3.57792300  |
| H | 1.72687900  | 0.76742400  | 2.09102400  | C                                        | -2.50332900    | -3.88366600        | 0.17197800  |
| H | 3.37339300  | 0.78920200  | 1.49293500  | C                                        | -2.85827700    | -2.95808000        | -0.97041400 |
| H | 4.16485700  | 2.45992000  | 0.11435000  | H                                        | -1.89869800    | -4.73152100        | -0.17539200 |
| H | 3.95414200  | 4.70399100  | -0.85804200 | H                                        | -1.91053100    | -3.36303000        | 0.93440300  |
| H | 1.71067000  | 5.82263100  | -0.89433100 | H                                        | -3.40241300    | -4.28764600        | 0.64761900  |
| H | -0.23264300 | 4.65225200  | 0.05749500  | C                                        | -4.14565600    | -2.79236600        | -1.33174900 |
| H | -1.05570500 | 3.11322900  | 1.50918000  | H                                        | -4.95509600    | -3.29328300        | -0.80739200 |
| H | -0.14617400 | 1.75377000  | 2.12422500  | H                                        | -4.42756800    | -2.15691300        | -2.16789700 |
| H | 1.58279000  | -0.28078900 | -2.62884400 | C                                        | -1.76781500    | -2.28629800        | -1.70597300 |
| H | 2.49480900  | 1.10747900  | -2.01813200 | C                                        | -0.42828800    | -2.73135100        | -1.73270900 |
| H | 3.23839400  | 0.02192000  | -3.20441400 | H                                        | -2.10898900    | -1.69825600        | -2.55734700 |
| H | 4.61599600  | 0.70353000  | -0.59936200 | H                                        | 0.16295300     | -2.53558500        | -2.62547300 |
| H | 5.07362400  | -0.93099600 | -0.10373900 | H                                        | -0.12892100    | -3.62327200        | -1.18714800 |
| H | 5.20561600  | -0.44419000 | -1.79369600 |                                          |                |                    |             |
| H | 3.79804700  | -2.26045500 | -2.70418800 |                                          |                |                    |             |
| H | 3.80675400  | -2.93576700 | -1.07513100 | 8-ts                                     |                |                    |             |
| H | 2.26955100  | -2.70943300 | -1.93271300 | Zero-point correction=                   | 1.026340       | (Hartree/Particle) |             |
| H | 0.56819600  | -1.50116500 | 2.72836400  | Thermal correction to Energy=            | 1.085841       |                    |             |
| H | 1.71218400  | -2.52656300 | 3.60538900  | Thermal correction to Enthalpy=          | 1.086786       |                    |             |
| H | 2.06473100  | -0.81281600 | 3.39907400  | Thermal correction to Gibbs Free Energy= | 0.926309       |                    |             |
| H | 4.31773700  | -1.19072700 | 2.17246200  | E(solvent)=                              | -2906.62578869 |                    |             |
| H | 4.01950700  | -2.82425600 | 2.77100900  | Pd                                       | 1.31511000     | 0.07065000         | -0.19985800 |
| H | 4.44583700  | -2.58130500 | 1.07807700  | P                                        | 2.87615700     | 1.88195400         | 0.02274000  |
| H | 2.30421600  | -3.80081700 | 0.23931100  | P                                        | 2.66773000     | -1.90758800        | -0.71728700 |
| H | 2.07781800  | -4.17461700 | 1.95181900  | C                                        | 4.70198300     | 1.35459700         | 0.00075200  |
| H | 0.76447900  | -3.42510700 | 1.01972600  | C                                        | 5.22130800     | 0.29458000         | 0.95758200  |
| H | -1.78322700 | 2.75622200  | -3.00870700 | C                                        | 5.94059700     | 0.71331300         | 2.09028200  |
| H | -0.51317900 | 2.89589400  | -1.78482700 | C                                        | 6.54255700     | -0.17943800        | 2.97282600  |
| H | -0.88507500 | 1.31600500  | -2.48668400 | C                                        | 6.47245600     | -1.54440300        | 2.70825800  |
| H | -3.90726800 | 3.19305500  | 0.01035600  | C                                        | 5.80249000     | -1.97787600        | 1.56777200  |
| H | -2.33650300 | 4.00031400  | -0.12648100 | C                                        | 5.15169400     | -1.09554300        | 0.68841200  |
| H | -3.39617000 | 3.87981700  | -1.53149100 | C                                        | 4.54348500     | -1.67029700        | -0.57638400 |
| H | -3.79484400 | 1.62680500  | -2.69413600 | C                                        | 2.69963100     | 2.92241200         | 1.64584300  |
| H | -3.13356200 | 0.14319000  | -1.98301600 | C                                        | 2.44929700     | 1.89935100         | 2.77765100  |
| H | -4.40250600 | 1.04476700  | -1.14422200 | C                                        | 3.92886300     | 3.77665200         | 2.02000300  |
| H | -3.87593700 | 1.62849700  | 3.40612200  | C                                        | 1.48916500     | 3.87724200         | 1.56611800  |
| H | -2.29093400 | 2.35795300  | 3.16362100  | C                                        | 2.85318600     | 3.07703600         | -1.50710100 |
| H | -3.61363400 | 2.71499200  | 2.04088600  | C                                        | 3.36974000     | 2.29822100         | -2.73614000 |
| H | -3.87925500 | -0.79372300 | 0.59418100  | C                                        | 3.70893600     | 4.34863900         | -1.34772500 |
| H | -4.60771400 | -0.40084200 | 2.16073700  | C                                        | 1.39662900     | 3.47843000         | -1.82392800 |
| H | -4.73968900 | 0.74227000  | 0.82774500  | C                                        | 2.25347800     | -3.32152100        | 0.52877600  |
| H | -1.82129900 | -1.24874000 | 2.20347200  | C                                        | 2.16606300     | -2.64761900        | 1.91846500  |
|   |             |             |             | C                                        | 3.26562900     | -4.48085700        | 0.61133000  |

|   |            |             |             |   |              |             |             |
|---|------------|-------------|-------------|---|--------------|-------------|-------------|
| C | 0.86851400 | -3.90686400 | 0.18880500  | H | 1.02797500   | -2.88917500 | -4.03017400 |
| C | 2.56482100 | -2.58574300 | -2.53312800 | H | 0.43535700   | -3.15485000 | -2.38605300 |
| C | 3.10813500 | -4.01425900 | -2.72905700 | H | 3.10506800   | -0.59652000 | -3.31145800 |
| C | 1.09458300 | -2.53259700 | -2.99353300 | H | 4.44989800   | -1.75772400 | -3.34252600 |
| C | 3.36754700 | -1.64739600 | -3.46127400 | H | 3.13163800   | -1.89732200 | -4.50351200 |
| H | 4.85386400 | 1.00792800  | -1.02433100 | C | -1.36005300  | -0.88172300 | 1.55889400  |
| H | 5.31473100 | 2.25540200  | 0.11126800  | C | -0.96873700  | -0.19280800 | 0.26980400  |
| H | 6.06649800 | 1.77565900  | 2.26785900  | H | -2.44445800  | -0.76009200 | 1.69137300  |
| H | 7.08493500 | 0.19344200  | 3.83706200  | H | -1.13765800  | -1.95370900 | 1.54938500  |
| H | 6.95778300 | -2.26433500 | 3.36114300  | H | -0.84366800  | -0.43384100 | 2.41476500  |
| H | 5.81095900 | -3.03714200 | 1.33229800  | C | -0.46032000  | 1.14082200  | 0.29546300  |
| H | 5.02626800 | -2.62927000 | -0.79393700 | H | -0.67679100  | 1.79897900  | -0.54423000 |
| H | 4.78493700 | -1.01240200 | -1.41543700 | H | -0.45722500  | 1.64330300  | 1.25897100  |
| H | 1.54233200 | 1.31486200  | 2.59895500  | C | -1.31810800  | -0.74701400 | -0.98360200 |
| H | 3.28327900 | 1.20033800  | 2.89206600  | C | -2.09891800  | -1.91157600 | -1.22058100 |
| H | 2.32881200 | 2.43538300  | 3.72865500  | H | -1.99442800  | -2.35620100 | -2.21295800 |
| H | 4.80884500 | 3.17319600  | 2.23974300  | H | -2.14486900  | -2.65204400 | -0.42062600 |
| H | 4.19549700 | 4.50403700  | 1.25079000  | H | -1.11933600  | -0.11451900 | -1.84981000 |
| H | 3.69462500 | 4.33991200  | 2.93295800  | P | -5.18162300  | -0.27030600 | -0.24827400 |
| H | 1.29216000 | 4.27499000  | 2.57027100  | O | -4.45316100  | -0.25314800 | 1.06254100  |
| H | 1.68281700 | 4.73439100  | 0.91454900  | O | -4.62014800  | -1.12456600 | -1.39906600 |
| H | 0.57799800 | 3.38569800  | 1.22433900  | H | -3.29804800  | -1.46351000 | -1.26905600 |
| H | 2.84061800 | 1.34861500  | -2.85610600 | O | -6.76233100  | -0.66308000 | -0.05082700 |
| H | 3.18445400 | 2.89585700  | -3.63780500 | O | -5.37605100  | 1.22026200  | -0.88263700 |
| H | 4.44554800 | 2.10109300  | -2.69931800 | C | -7.05860900  | -1.85920300 | 0.67743100  |
| H | 4.74750700 | 4.12838200  | -1.07871900 | H | -6.57466800  | -1.81848000 | 1.66188600  |
| H | 3.73040900 | 4.88524800  | -2.30567300 | H | -6.65422600  | -2.72655900 | 0.13600300  |
| H | 3.29873500 | 5.03718500  | -0.60455100 | C | -8.57128100  | -1.97674400 | 0.81610700  |
| H | 0.90975200 | 4.01587300  | -1.00834600 | H | -8.94768000  | -1.08102900 | 1.32867200  |
| H | 1.39278100 | 4.13810400  | -2.70167300 | H | -9.01813200  | -1.97473500 | -0.18706400 |
| H | 0.79025100 | 2.60043600  | -2.06285600 | C | -9.00041400  | -3.23619700 | 1.57941600  |
| H | 1.87516100 | -3.40025700 | 2.66375200  | H | -8.53833000  | -3.23426700 | 2.57697700  |
| H | 3.12225600 | -2.21971300 | 2.23215300  | H | -8.60985700  | -4.12589000 | 1.06497600  |
| H | 1.41569700 | -1.85139800 | 1.93105700  | C | -10.52119300 | -3.35939700 | 1.72349100  |
| H | 3.36816700 | -5.02867200 | -0.32670600 | H | -10.80004100 | -4.26710500 | 2.27155400  |
| H | 4.25689800 | -4.15051200 | 0.92479500  | H | -10.93784400 | -2.50102300 | 2.26488900  |
| H | 2.91463000 | -5.19539400 | 1.36783400  | H | -11.00934500 | -3.39842600 | 0.74185100  |
| H | 0.53473000 | -4.53951700 | 1.02182000  | C | -5.86316100  | 2.26455200  | -0.03133100 |
| H | 0.11763800 | -3.12798100 | 0.03995000  | H | -6.91204200  | 2.06331100  | 0.22545600  |
| H | 0.89155800 | -4.53711000 | -0.70531500 | H | -5.28295200  | 2.27911900  | 0.89999200  |
| H | 3.11346200 | -4.24782700 | -3.80223200 | C | -5.73737200  | 3.58852700  | -0.77494800 |
| H | 4.13655000 | -4.12777900 | -2.36927100 | H | -6.28896400  | 3.51518300  | -1.72175800 |
| H | 2.48578600 | -4.76831400 | -2.24085500 | H | -4.68246300  | 3.74554200  | -1.03923100 |
| H | 0.70750900 | -1.50996400 | -2.96155200 | C | -6.25554200  | 4.77814100  | 0.04319400  |



|   |             |            |             |
|---|-------------|------------|-------------|
| H | -7.30830100 | 4.60703700 | 0.30926200  |
| H | -5.70733900 | 4.83437900 | 0.99458700  |
| C | -6.12968200 | 6.11435800 | -0.69666900 |
| H | -6.69630200 | 6.10091400 | -1.63588600 |
| H | -6.50774800 | 6.94603400 | -0.09050100 |
| H | -5.08350300 | 6.33146400 | -0.94634300 |

9

Zero-point correction=0.765533 (Hartree/Particle)

Thermal correction to Energy=0.807061

Thermal correction to Enthalpy=0.808005

Thermal correction to Gibbs Free Energy=0.696417

E(solv)= -1948.17224206

|    |             |             |             |
|----|-------------|-------------|-------------|
| Pd | -0.26012100 | -1.13831900 | -0.38489200 |
| P  | 1.94493700  | -0.37243300 | 0.23771200  |
| P  | -1.73374000 | 0.69200600  | 0.35592400  |
| C  | 2.01790600  | 1.32503900  | 1.07382400  |
| C  | 1.49660700  | 2.60095200  | 0.43902100  |
| C  | 2.42042600  | 3.52061700  | -0.08550600 |
| C  | 2.04189700  | 4.77736400  | -0.55099000 |
| C  | 0.70949800  | 5.16702800  | -0.44716500 |
| C  | -0.21247200 | 4.28697400  | 0.11346100  |
| C  | 0.14130900  | 2.99483100  | 0.53601500  |
| C  | -0.90679100 | 2.14915800  | 1.22956500  |
| C  | 3.16483900  | -0.23647300 | -1.25866800 |
| C  | 2.36047600  | 0.41387300  | -2.40677600 |
| C  | 4.40413700  | 0.63846400  | -0.97272900 |
| C  | 3.68338900  | -1.61329000 | -1.72255600 |
| C  | 2.70450700  | -1.44501400 | 1.66840100  |
| C  | 1.85483100  | -1.22108400 | 2.94088700  |
| C  | 4.17295800  | -1.09517200 | 1.98812300  |
| C  | 2.62163900  | -2.94815200 | 1.33809500  |
| C  | -2.66050600 | 1.47813300  | -1.14366400 |
| C  | -1.59193200 | 1.69732200  | -2.24019100 |
| C  | -3.35432000 | 2.82258600  | -0.84653600 |
| C  | -3.72135100 | 0.51102400  | -1.69763400 |
| C  | -2.96081000 | 0.14490500  | 1.74954200  |
| C  | -4.10432600 | 1.14308800  | 2.01612400  |
| C  | -3.56480100 | -1.22432900 | 1.39028500  |
| C  | -2.15574500 | -0.03859000 | 3.05677200  |
| H  | 1.49120500  | 1.16484600  | 2.01738100  |
| H  | 3.06784400  | 1.47801700  | 1.33980800  |
| H  | 3.47556200  | 3.27096200  | -0.08377000 |
| H  | 2.78976200  | 5.45580400  | -0.95026500 |

|   |             |             |             |
|---|-------------|-------------|-------------|
| H | 0.39352600  | 6.15665400  | -0.76313300 |
| H | -1.23023500 | 4.63096500  | 0.26527900  |
| H | -1.71166500 | 2.80395400  | 1.57808600  |
| H | -0.47227000 | 1.70376300  | 2.12847600  |
| H | 1.51109000  | -0.20510800 | -2.71191000 |
| H | 1.98053700  | 1.40305800  | -2.13421800 |
| H | 3.01614000  | 0.53788100  | -3.27789700 |
| H | 4.14648200  | 1.68024200  | -0.79535100 |
| H | 5.00254100  | 0.27841200  | -0.13404000 |
| H | 5.04711100  | 0.61817000  | -1.86121800 |
| H | 4.27376300  | -1.46446600 | -2.63507500 |
| H | 4.34664400  | -2.07695300 | -0.98690700 |
| H | 2.88824600  | -2.31613000 | -1.96768300 |
| H | 0.78561400  | -1.35698400 | 2.74686300  |
| H | 2.14836300  | -1.96383600 | 3.69244300  |
| H | 2.00899700  | -0.23712700 | 3.39218300  |
| H | 4.32751000  | -0.03349600 | 2.20211800  |
| H | 4.47372100  | -1.64863200 | 2.88642200  |
| H | 4.85469400  | -1.39134700 | 1.18668400  |
| H | 3.15423000  | -3.21971700 | 0.42414100  |
| H | 3.07974800  | -3.51170000 | 2.16011300  |
| H | 1.58343800  | -3.27792200 | 1.25324900  |
| H | -2.07682100 | 2.11419500  | -3.13214200 |
| H | -0.81221600 | 2.39710100  | -1.92904400 |
| H | -1.11095200 | 0.75622700  | -2.52946400 |
| H | -4.14590900 | 2.73888900  | -0.10025900 |
| H | -2.65578400 | 3.59355500  | -0.52605600 |
| H | -3.81956500 | 3.18068100  | -1.77354600 |
| H | -4.14121800 | 0.93949200  | -2.61620800 |
| H | -3.29110400 | -0.45716700 | -1.95500500 |
| H | -4.55358600 | 0.35491200  | -1.00510600 |
| H | -4.66098400 | 0.81183900  | 2.90185500  |
| H | -3.74773100 | 2.15705700  | 2.22268300  |
| H | -4.81670700 | 1.18847600  | 1.18827600  |
| H | -2.78401400 | -1.98225000 | 1.27554000  |
| H | -4.23086300 | -1.54645300 | 2.20060300  |
| H | -4.15493700 | -1.19744600 | 0.47274500  |
| H | -1.26847000 | -0.66411800 | 2.91113600  |
| H | -1.84620300 | 0.91066800  | 3.50268100  |
| H | -2.79342800 | -0.54377500 | 3.79224600  |
| C | -0.96020100 | -4.42468600 | 0.00197200  |
| C | -0.78587800 | -3.33041800 | -1.02815900 |
| H | -1.72275700 | -4.18410400 | 0.74875600  |
| H | -1.27623300 | -5.34883700 | -0.49856900 |

|          |                    |                    |                    |
|----------|--------------------|--------------------|--------------------|
| H        | -0.02359300        | -4.63762900        | 0.52213900         |
| C        | 0.51806800         | -2.87019500        | -1.38563200        |
| H        | 1.36890700         | -3.40853900        | -0.98832300        |
| H        | 0.66499300         | -2.47780000        | -2.39171300        |
| C        | -1.87652600        | -2.68644600        | -1.60787400        |
| C        | -3.29735800        | -3.14731400        | -1.43566600        |
| H        | -3.51063400        | -3.52425700        | -0.43331300        |
| H        | -4.02333700        | -2.36814400        | -1.67454700        |
| H        | -1.67831200        | -2.08023800        | -2.49139700        |
| <u>H</u> | <u>-3.48032600</u> | <u>-3.97376400</u> | <u>-2.13930000</u> |

10-ts

Zero-point correction= 0.884580 (Hartree/Particle)

Thermal correction to Energy= 0.933326

Thermal correction to Enthalpy= 0.934271

Thermal correction to Gibbs Free Energy= 0.804430

E(Solv)= -2328.13125863

|    |             |             |             |
|----|-------------|-------------|-------------|
| Pd | -0.16740700 | -0.10479700 | 0.02020400  |
| P  | -1.22030900 | 2.03516000  | 0.40902500  |
| P  | -1.96540800 | -1.75667700 | 0.41032500  |
| C  | -3.09835800 | 1.97727500  | 0.67011700  |
| C  | -4.00894500 | 1.32136400  | -0.35387000 |
| C  | -4.73208200 | 2.14660700  | -1.23207100 |
| C  | -5.66371700 | 1.64588100  | -2.13754300 |
| C  | -5.92914300 | 0.27927700  | -2.15149900 |
| C  | -5.25775500 | -0.54921800 | -1.25665400 |
| C  | -4.28381300 | -0.06843700 | -0.36494700 |
| C  | -3.70047200 | -1.03636900 | 0.64665900  |
| C  | -0.97057900 | 3.31327900  | -1.02289000 |
| C  | -1.16998600 | 2.52555300  | -2.33828200 |
| C  | -1.95151400 | 4.50459200  | -1.01538500 |
| C  | 0.45728200  | 3.90036800  | -1.00590800 |
| C  | -0.66455100 | 2.83420200  | 2.08851500  |
| C  | -1.22587300 | 1.97762600  | 3.24386200  |
| C  | -1.13458900 | 4.28751800  | 2.29630400  |
| C  | 0.87342700  | 2.77586800  | 2.20393800  |
| C  | -2.12375000 | -2.92112000 | -1.12140200 |
| C  | -2.03871600 | -2.00028300 | -2.36148100 |
| C  | -3.41832500 | -3.75217100 | -1.21659100 |
| C  | -0.92576300 | -3.88962900 | -1.15818800 |
| C  | -1.83692300 | -2.81365300 | 2.03440200  |
| C  | -2.75922000 | -4.04703000 | 2.08817500  |
| C  | -0.37731800 | -3.27225300 | 2.21815100  |
| C  | -2.18337500 | -1.90929500 | 3.23810900  |

|   |             |             |             |
|---|-------------|-------------|-------------|
| H | -3.21022000 | 1.46094800  | 1.62669200  |
| H | -3.44042300 | 3.00362000  | 0.83790500  |
| H | -4.59367800 | 3.22077500  | -1.17843000 |
| H | -6.19773700 | 2.32306800  | -2.79763100 |
| H | -6.67411000 | -0.13617400 | -2.82374200 |
| H | -5.52597300 | -1.60012300 | -1.22325300 |
| H | -4.39583300 | -1.87268900 | 0.77362900  |
| H | -3.64504500 | -0.54014300 | 1.61884000  |
| H | -0.44917100 | 1.70829600  | -2.43456000 |
| H | -2.17429700 | 2.09864600  | -2.41343700 |
| H | -1.03174300 | 3.20489300  | -3.18966200 |
| H | -1.90444900 | 5.09488300  | -0.09866400 |
| H | -1.68927700 | 5.17307800  | -1.84553800 |
| H | -2.98426800 | 4.19786300  | -1.17369500 |
| H | 0.61822200  | 4.45014400  | -1.94219300 |
| H | 0.59991400  | 4.61340200  | -0.18895300 |
| H | 1.23416900  | 3.13843100  | -0.93587700 |
| H | -0.98084900 | 0.91967100  | 3.11367300  |
| H | -0.76946700 | 2.30935800  | 4.18498900  |
| H | -2.30854700 | 2.07652900  | 3.36400400  |
| H | -2.21764300 | 4.40098900  | 2.18416500  |
| H | -0.88334200 | 4.59854400  | 3.31874200  |
| H | -0.64196800 | 4.98886000  | 1.61832300  |
| H | 1.38530300  | 3.32833400  | 1.41352900  |
| H | 1.17475400  | 3.21681300  | 3.16307200  |
| H | 1.22578700  | 1.73990400  | 2.18395200  |
| H | -2.06374800 | -2.61706300 | -3.26973200 |
| H | -2.87479700 | -1.29803600 | -2.41315500 |
| H | -1.10964200 | -1.42108700 | -2.36838000 |
| H | -3.53489400 | -4.46058200 | -0.39515600 |
| H | -4.31264100 | -3.13011600 | -1.26057200 |
| H | -3.39108400 | -4.33505900 | -2.14654400 |
| H | -0.90156300 | -4.39316700 | -2.13331500 |
| H | 0.02324900  | -3.36163300 | -1.03258400 |
| H | -0.99662500 | -4.67023000 | -0.39473800 |
| H | -2.70055800 | -4.49197900 | 3.09017900  |
| H | -3.80993600 | -3.79724600 | 1.90897700  |
| H | -2.46262000 | -4.82176400 | 1.37641100  |
| H | 0.30970000  | -2.41931600 | 2.21775600  |
| H | -0.27630200 | -3.78937100 | 3.18115800  |
| H | -0.06221800 | -3.97194700 | 1.44088300  |
| H | -1.62519200 | -0.96911000 | 3.22150200  |
| H | -3.25091700 | -1.68033000 | 3.30182900  |
| H | -1.91430200 | -2.43410000 | 4.16328100  |

|          |                   |                    |                    |   |             |             |             |
|----------|-------------------|--------------------|--------------------|---|-------------|-------------|-------------|
| H        | 1.75910300        | -3.48647300        | 0.38758700         | C | -5.21642100 | -1.31068400 | -0.73527200 |
| C        | 1.92676700        | -1.36951100        | -2.18343700        | C | -4.22538300 | -0.67797200 | 0.03433500  |
| C        | 1.90520200        | -0.80442000        | -0.77064500        | C | -3.33009900 | -1.54377200 | 0.90050100  |
| H        | 2.93327600        | -1.30507300        | -2.62795200        | C | -1.71818300 | 3.28604600  | -0.88685000 |
| H        | 1.60756700        | -2.41426000        | -2.23975000        | C | -1.95665900 | 2.51091200  | -2.20314900 |
| H        | 1.26369000        | -0.79348800        | -2.83477600        | C | -2.89049200 | 4.26891100  | -0.68260500 |
| C        | 1.70791500        | 0.60511500         | -0.60136100        | C | -0.43547500 | 4.13300300  | -1.03162900 |
| H        | 1.65260400        | 1.20521000         | -1.50707500        | C | -0.88701000 | 2.78852600  | 2.12559800  |
| H        | 2.21813100        | 1.11394100         | 0.21580000         | C | -1.11597300 | 1.81255700  | 3.29983100  |
| C        | 2.60205900        | -1.52337900        | 0.27965700         | C | -1.57880300 | 4.12259600  | 2.46913900  |
| C        | 2.74213900        | -3.03020800        | 0.25766500         | C | 0.63677800  | 3.01512800  | 2.03099400  |
| H        | 3.14023100        | -3.39648000        | -0.69445900        | C | -1.71312800 | -3.04773400 | -1.17034800 |
| H        | 3.39058000        | -3.37702000        | 1.06589400         | C | -1.96643700 | -2.09306900 | -2.36084900 |
| H        | 2.45190400        | -1.11584900        | 1.27744000         | C | -2.84365900 | -4.09458400 | -1.13257600 |
| C        | 6.19445900        | 0.30038700         | 0.39717400         | C | -0.38356300 | -3.78610600 | -1.41801400 |
| C        | 6.32455000        | -0.51630100        | -0.75713300        | C | -0.98633100 | -2.97363500 | 1.91497000  |
| C        | 7.44856500        | -0.45758400        | -1.59642800        | C | -1.64808000 | -4.36078400 | 2.02842400  |
| C        | 8.43408400        | 0.44927500         | -1.24454900        | C | 0.54385100  | -3.14977500 | 1.86869800  |
| C        | 8.32199800        | 1.27860600         | -0.09875900        | C | -1.31230300 | -2.18555300 | 3.20307700  |
| C        | 7.21625100        | 1.21673300         | 0.72720000         | H | -3.17775800 | 0.97399500  | 1.93949200  |
| C        | 4.95063800        | -0.07113500        | 0.97118900         | H | -3.79584900 | 2.46579400  | 1.27079100  |
| H        | 7.54261400        | -1.08766500        | -2.47485000        | H | -5.25103500 | 2.51350700  | -0.55007600 |
| H        | 9.32191300        | 0.52940600         | -1.86445500        | H | -6.88383400 | 1.37105300  | -1.97501100 |
| H        | 9.12574500        | 1.97173400         | 0.12791700         | H | -6.90097100 | -1.13239800 | -2.06289800 |
| H        | 7.13349300        | 1.85002400         | 1.60484400         | H | -5.28128500 | -2.39360500 | -0.71891500 |
| H        | 4.45505900        | 0.30833900         | 1.85415400         | H | -3.83275200 | -2.50025700 | 1.07838900  |
| N        | 4.38596400        | -1.03091300        | 0.24997900         | H | -3.22360900 | -1.07243700 | 1.88077200  |
| N        | 5.18989100        | -1.28173600        | -0.81753100        | H | -1.12021500 | 1.84692000  | -2.44104000 |
| <u>H</u> | <u>4.99016200</u> | <u>-2.07132800</u> | <u>-1.41332300</u> | H | -2.86567400 | 1.90375800  | -2.16298900 |
|          |                   |                    |                    | H | -2.07004000 | 3.22679700  | -3.02786700 |
|          |                   |                    |                    | H | -2.82329800 | 4.83089600  | 0.25042300  |
|          |                   |                    |                    | H | -2.87685500 | 4.99836400  | -1.50264100 |
|          |                   |                    |                    | H | -3.86066700 | 3.77570900  | -0.71748300 |
|          |                   |                    |                    | H | -0.51485000 | 4.73022900  | -1.94917900 |
|          |                   |                    |                    | H | -0.30935000 | 4.83571500  | -0.20324000 |
|          |                   |                    |                    | H | 0.47035000  | 3.53052000  | -1.10930800 |
|          |                   |                    |                    | H | -0.70614800 | 0.82179200  | 3.08411800  |
|          |                   |                    |                    | H | -0.59711400 | 2.19822300  | 4.18631700  |
|          |                   |                    |                    | H | -2.17060800 | 1.70691200  | 3.56996900  |
|          |                   |                    |                    | H | -2.66917500 | 4.03429400  | 2.51173300  |
|          |                   |                    |                    | H | -1.24403300 | 4.44927400  | 3.46222200  |
|          |                   |                    |                    | H | -1.32396400 | 4.92042000  | 1.76717600  |
|          |                   |                    |                    | H | 0.92380200  | 3.67279000  | 1.20799000  |
|          |                   |                    |                    | H | 0.98514500  | 3.48225100  | 2.96111700  |

10-ts-iso

Zero-point correction= 0.885154 (Hartree/Particle)

Thermal correction to Energy= 0.933640

Thermal correction to Enthalpy= 0.934584

Thermal correction to Gibbs Free Energy= 0.805712

E(Solv) = -2328.12742014

|    |             |             |             |
|----|-------------|-------------|-------------|
| Pd | -0.16073100 | 0.05783700  | -0.15316400 |
| P  | -1.52221400 | 1.94618500  | 0.49658600  |
| P  | -1.54663800 | -1.91722900 | 0.38513900  |
| C  | -3.29993200 | 1.52675000  | 1.00477800  |
| C  | -4.21264100 | 0.73797100  | 0.08155200  |
| C  | -5.19602100 | 1.43436400  | -0.64166100 |
| C  | -6.14322500 | 0.79022400  | -1.43318800 |
| C  | -6.15318600 | -0.60106700 | -1.48156600 |

|   |             |             |             |
|---|-------------|-------------|-------------|
| H | 1.16750900  | 2.06521300  | 1.91503600  |
| H | -2.02027000 | -2.67994400 | -3.28741000 |
| H | -2.90709300 | -1.54542100 | -2.25884700 |
| H | -1.15890900 | -1.36144100 | -2.46783500 |
| H | -2.72713100 | -4.82323400 | -0.32914600 |
| H | -3.83050200 | -3.64063100 | -1.04250400 |
| H | -2.83537700 | -4.65071100 | -2.07906300 |
| H | -0.40946200 | -4.24688400 | -2.41390400 |
| H | 0.46966900  | -3.10367000 | -1.39034300 |
| H | -0.21148500 | -4.58987700 | -0.69596800 |
| H | -1.35799200 | -4.81581800 | 2.98452000  |
| H | -2.74157100 | -4.30920200 | 2.01654800  |
| H | -1.32611100 | -5.04402400 | 1.23836000  |
| H | 1.05292200  | -2.18093300 | 1.83064600  |
| H | 0.87656700  | -3.67234800 | 2.77492700  |
| H | 0.86895300  | -3.74588500 | 1.01340900  |
| H | -0.94276400 | -1.15721600 | 3.16117400  |
| H | -2.38252700 | -2.16355400 | 3.42709900  |
| H | -0.81926200 | -2.67640400 | 4.05140100  |
| H | 2.38349700  | -2.92742700 | -0.33832200 |
| C | 1.81361800  | -0.75306800 | -2.66068200 |
| C | 1.88204600  | -0.22124700 | -1.23318700 |
| H | 2.76617600  | -0.62239700 | -3.19941900 |
| H | 1.57461100  | -1.81853700 | -2.70941300 |
| H | 1.04458400  | -0.22180100 | -3.22889400 |
| C | 1.44768400  | 1.12614300  | -0.96781600 |
| H | 1.14890600  | 1.72760900  | -1.82508400 |
| H | 1.94668000  | 1.69878700  | -0.18644000 |
| C | 2.81304000  | -0.83461400 | -0.30833800 |
| C | 3.24479000  | -2.27173300 | -0.48588200 |
| H | 3.63802200  | -2.45035400 | -1.48980200 |
| H | 4.00879900  | -2.55760000 | 0.23952800  |
| H | 2.71724600  | -0.50469300 | 0.72182000  |
| C | 6.62400000  | 0.81631100  | -0.72765100 |
| C | 5.74863100  | -0.08655900 | -0.03644800 |
| C | 6.23557500  | -0.91034100 | 1.00680000  |
| C | 7.57523500  | -0.81421000 | 1.31350700  |
| C | 8.45350300  | 0.07234900  | 0.62365900  |
| C | 7.99797900  | 0.88728200  | -0.38618500 |
| C | 5.80577800  | 1.47506700  | -1.65608200 |
| H | 5.58155000  | -1.58107200 | 1.55266700  |
| H | 7.98011400  | -1.43066600 | 2.11061200  |
| H | 9.49961200  | 0.10156400  | 0.91134600  |
| H | 8.66421900  | 1.56788200  | -0.90698000 |

|          |                   |                   |                    |
|----------|-------------------|-------------------|--------------------|
| H        | 6.01468600        | 2.24323800        | -2.38650300        |
| N        | 4.57146400        | 0.97278400        | -1.50161100        |
| N        | 4.49257200        | 0.03582700        | -0.53843600        |
| <u>H</u> | <u>3.70707600</u> | <u>1.24600000</u> | <u>-1.95838600</u> |

11

Zero-point correction= 0.886879 (Hartree/Particle)

Thermal correction to Energy= 0.935272

Thermal correction to Enthalpy= 0.936216

Thermal correction to Gibbs Free Energy= 0.808188

E(Solv)= -2328.13979717

|    |             |             |             |
|----|-------------|-------------|-------------|
| Pd | -0.13775500 | -0.03257600 | 0.11792600  |
| P  | -1.48897500 | 1.98252700  | 0.52164700  |
| P  | -1.77783000 | -1.87247600 | 0.31433000  |
| C  | -3.36815300 | 1.74012500  | 0.62345800  |
| C  | -4.10131300 | 1.04651100  | -0.51087700 |
| C  | -4.85151500 | 1.83395300  | -1.40109900 |
| C  | -5.61281700 | 1.28560200  | -2.42972900 |
| C  | -5.67125800 | -0.09878800 | -2.56546100 |
| C  | -4.97820200 | -0.89747300 | -1.65996500 |
| C  | -4.17751000 | -0.36263400 | -0.63631000 |
| C  | -3.58841200 | -1.31382800 | 0.38874100  |
| C  | -1.26621000 | 3.33641900  | -0.84729600 |
| C  | -1.28361100 | 2.58484700  | -2.19857700 |
| C  | -2.35776600 | 4.42623700  | -0.88584600 |
| C  | 0.09082000  | 4.05813300  | -0.70020000 |
| C  | -1.14875100 | 2.78092300  | 2.25830800  |
| C  | -1.71417000 | 1.83858000  | 3.34236500  |
| C  | -1.76826000 | 4.17629600  | 2.46834300  |
| C  | 0.37504100  | 2.85853100  | 2.49468300  |
| C  | -1.70434200 | -3.03611300 | -1.22668900 |
| C  | -1.59777300 | -2.09740000 | -2.45145000 |
| C  | -2.90514400 | -3.97989100 | -1.43830200 |
| C  | -0.42823200 | -3.89737400 | -1.16331300 |
| C  | -1.73612300 | -2.94251900 | 1.94056800  |
| C  | -2.55278300 | -4.24831800 | 1.89113800  |
| C  | -0.27254700 | -3.28404400 | 2.27653500  |
| C  | -2.27786900 | -2.09065800 | 3.10989800  |
| H  | -3.50909100 | 1.16868100  | 1.54462600  |
| H  | -3.82938500 | 2.71743600  | 0.79843300  |
| H  | -4.87212900 | 2.90939700  | -1.26143700 |
| H  | -6.17586800 | 1.93423400  | -3.09443900 |
| H  | -6.27791000 | -0.55673800 | -3.34126700 |
| H  | -5.09398000 | -1.97401600 | -1.72772100 |

|   |             |             |             |                                          |                   |                    |                    |
|---|-------------|-------------|-------------|------------------------------------------|-------------------|--------------------|--------------------|
| H | -4.21031500 | -2.21435200 | 0.42457500  | C                                        | 1.69213000        | 0.89022700         | -0.35440600        |
| H | -3.67148400 | -0.85301600 | 1.37541500  | H                                        | 1.58069400        | 1.51836800         | -1.23690400        |
| H | -0.48682800 | 1.83743600  | -2.25764500 | H                                        | 2.04069500        | 1.42134000         | 0.53352600         |
| H | -2.23479000 | 2.07346400  | -2.37098800 | C                                        | 2.91858000        | -1.13817600        | 0.48344500         |
| H | -1.13969700 | 3.30517500  | -3.01498000 | C                                        | 2.90612100        | -2.65966400        | 0.58283500         |
| H | -2.44298800 | 4.98332900  | 0.04875400  | H                                        | 3.23012300        | -3.13293300        | -0.34901300        |
| H | -2.10063800 | 5.14823000  | -1.67199200 | H                                        | 3.53217600        | -3.02179000        | 1.40497900         |
| H | -3.33843300 | 4.02508800  | -1.13711200 | H                                        | 2.73779800        | -0.69858200        | 1.46943300         |
| H | 0.26898800  | 4.65496600  | -1.60433400 | C                                        | 6.59109100        | -0.58960600        | -0.14830500        |
| H | 0.10036200  | 4.75043200  | 0.14635600  | C                                        | 6.00138500        | 0.67369400         | -0.42634900        |
| H | 0.93052900  | 3.37070000  | -0.58857700 | C                                        | 6.75950400        | 1.77964100         | -0.84635500        |
| H | -1.35187200 | 0.81522500  | 3.21124100  | C                                        | 8.12195600        | 1.57648400         | -0.97159000        |
| H | -1.37499700 | 2.18508800  | 4.32683900  | C                                        | 8.73247400        | 0.32377600         | -0.69170000        |
| H | -2.80764000 | 1.82437700  | 3.36929500  | C                                        | 7.98783100        | -0.76253700        | -0.28160500        |
| H | -2.84598200 | 4.19150300  | 2.27596700  | C                                        | 5.51777500        | -1.43106600        | 0.21842500         |
| H | -1.62432400 | 4.47611900  | 3.51473800  | H                                        | 6.30289300        | 2.74030100         | -1.05908400        |
| H | -1.29700200 | 4.94294900  | 1.84824300  | H                                        | 8.74926100        | 2.40210200         | -1.29350200        |
| H | 0.88934600  | 3.49310500  | 1.76967800  | H                                        | 9.80732600        | 0.22825300         | -0.80563500        |
| H | 0.56161300  | 3.28040600  | 3.49091800  | H                                        | 8.45358400        | -1.71912700        | -0.06823300        |
| H | 0.82608400  | 1.86154600  | 2.46216000  | H                                        | 5.51839600        | -2.46869000        | 0.51130900         |
| H | -1.48058900 | -2.70233600 | -3.36056400 | N                                        | 4.38218200        | -0.73362900        | 0.16831600         |
| H | -2.49058400 | -1.47901600 | -2.57614900 | N                                        | 4.66364000        | 0.54440800         | -0.19455800        |
| H | -0.73417500 | -1.43029400 | -2.37131600 | <u>H</u>                                 | <u>3.87318500</u> | <u>1.13860100</u>  | <u>-0.43668600</u> |
| H | -3.00273000 | -4.73102700 | -0.65339400 |                                          |                   |                    |                    |
| H | -3.85354200 | -3.44764700 | -1.51731700 | 12-ts                                    |                   |                    |                    |
| H | -2.76301200 | -4.51744700 | -2.38499200 | Zero-point correction=                   | 0.908227          | (Hartree/Particle) |                    |
| H | -0.27866600 | -4.39085900 | -2.13255500 | Thermal correction to Energy=            | 0.961275          |                    |                    |
| H | 0.45801600  | -3.29260600 | -0.95687200 | Thermal correction to Enthalpy=          | 0.962219          |                    |                    |
| H | -0.49575800 | -4.68626900 | -0.40782200 | Thermal correction to Gibbs Free Energy= | 0.817393          |                    |                    |
| H | -2.56578100 | -4.69760200 | 2.89299300  | E(Solv)=                                 | -2709.98191475    |                    |                    |
| H | -3.59508900 | -4.08521400 | 1.59920100  | Pd                                       | -0.08672000       | -0.26286500        | 0.18644300         |
| H | -2.11669500 | -4.98815900 | 1.21496100  | P                                        | -1.42532600       | -0.16021900        | 2.00335400         |
| H | 0.33416800  | -2.37627500 | 2.36230900  | P                                        | -1.32882300       | -1.11431500        | -1.80394100        |
| H | -0.23193300 | -3.81125800 | 3.23869000  | C                                        | -3.22088700       | -0.65084200        | 1.58377300         |
| H | 0.18063600  | -3.94077200 | 1.52995800  | C                                        | -4.01560900       | 0.07934100         | 0.51177600         |
| H | -1.80740100 | -1.10493300 | 3.15328900  | C                                        | -4.93430500       | 1.05863000         | 0.93007600         |
| H | -3.36277900 | -1.95875600 | 3.07122300  | C                                        | -5.78280400       | 1.72613000         | 0.05148600         |
| H | -2.05342600 | -2.60309700 | 4.05381300  | C                                        | -5.75806800       | 1.39020000         | -1.29946500        |
| H | 1.88519500  | -2.97321500 | 0.78555300  | C                                        | -4.88669200       | 0.39426700         | -1.73015500        |
| C | 2.13660700  | -1.02749500 | -1.95813700 | C                                        | -3.99565100       | -0.26616100        | -0.86558600        |
| C | 1.98876100  | -0.50102200 | -0.53549100 | C                                        | -3.16984000       | -1.39880700        | -1.44998700        |
| H | 3.17212600  | -0.93411500 | -2.32804200 | C                                        | -1.54917000       | 1.57513700         | 2.84358500         |
| H | 1.85960700  | -2.08090600 | -2.05485700 | C                                        | -1.68003500       | 2.59041100         | 1.68461900         |
| H | 1.49887200  | -0.46275300 | -2.64373200 | C                                        | -2.73050800       | 1.77068500         | 3.81502300         |

|   |             |             |             |   |             |             |             |
|---|-------------|-------------|-------------|---|-------------|-------------|-------------|
| C | -0.24643700 | 1.89393300  | 3.60792500  | H | -2.17266500 | 0.69693400  | -5.15454600 |
| C | -1.01183300 | -1.50677300 | 3.33567400  | H | 0.25212800  | 0.95765800  | -4.57433400 |
| C | -1.34181300 | -2.89334900 | 2.73913900  | H | 0.93148200  | 0.17148600  | -3.13494900 |
| C | -1.76897600 | -1.36377400 | 4.66968600  | H | 0.32192900  | -0.80188500 | -4.49567700 |
| C | 0.50795000  | -1.48706300 | 3.60601700  | H | -1.08096700 | -4.36310300 | -3.95450400 |
| C | -1.26451800 | 0.12381100  | -3.27736500 | H | -2.44002800 | -3.24097700 | -3.83138900 |
| C | -1.47357000 | 1.52392200  | -2.65264100 | H | -0.92178300 | -2.72723600 | -4.59302800 |
| C | -2.30674900 | -0.08309900 | -4.39233800 | H | 1.15657500  | -2.65458500 | -1.44151100 |
| C | 0.14946200  | 0.09836200  | -3.89715600 | H | 1.06466600  | -3.95310800 | -2.65611200 |
| C | -0.80194500 | -2.87667200 | -2.40172700 | H | 1.18194800  | -2.26000300 | -3.15623300 |
| C | -1.34786800 | -3.31242400 | -3.77356300 | H | -1.00205600 | -3.59570200 | -0.33164000 |
| C | 0.74190900  | -2.93036200 | -2.41585900 | H | -2.36162200 | -4.06523500 | -1.37776300 |
| C | -1.27997600 | -3.89916200 | -1.34640700 | H | -0.80009600 | -4.86658700 | -1.54436800 |
| H | -3.11996300 | -1.69904800 | 1.29240500  | P | 2.91114600  | 0.67248000  | 0.02326500  |
| H | -3.80366200 | -0.64411400 | 2.51220800  | O | 1.91787900  | 0.03542600  | -0.94018500 |
| H | -5.00829000 | 1.28463200  | 1.98848200  | O | 2.29258400  | 0.88750300  | 1.43595400  |
| H | -6.47188800 | 2.47770900  | 0.42682200  | H | 1.07270300  | 0.41531300  | 1.28156100  |
| H | -6.42623700 | 1.87334600  | -2.00705700 | O | 4.29442300  | -0.15079700 | 0.11235300  |
| H | -4.91443200 | 0.09410200  | -2.77325200 | O | 3.54743900  | 2.05276100  | -0.51299600 |
| H | -3.66745400 | -1.76407000 | -2.35580000 | C | 2.77917100  | 3.26864000  | -0.41822100 |
| H | -3.16632200 | -2.23449500 | -0.74435800 | H | 2.52863000  | 3.45241000  | 0.63302900  |
| H | -0.83050200 | 2.51340200  | 0.99875700  | H | 1.84384800  | 3.15564700  | -0.98223400 |
| H | -2.59610700 | 2.44606200  | 1.10511700  | C | 3.61871000  | 4.40088700  | -0.99232300 |
| H | -1.69959900 | 3.60803200  | 2.09856200  | H | 3.87924400  | 4.15601900  | -2.03027600 |
| H | -2.66325400 | 1.13154100  | 4.69744500  | H | 4.56255900  | 4.45611200  | -0.43443000 |
| H | -2.72708900 | 2.81097200  | 4.16734300  | C | 2.89368800  | 5.75207400  | -0.93638900 |
| H | -3.69981100 | 1.59789800  | 3.34582600  | H | 2.62789500  | 5.98186800  | 0.10515500  |
| H | -0.27061100 | 2.95003600  | 3.90960900  | H | 1.94400900  | 5.68105900  | -1.48566000 |
| H | -0.14946700 | 1.30296200  | 4.52409900  | C | 3.73039100  | 6.89908100  | -1.51324300 |
| H | 0.64875300  | 1.74343700  | 2.99949500  | H | 3.98321500  | 6.71450100  | -2.56443000 |
| H | -0.90704200 | -3.01318800 | 1.74161400  | H | 3.19039000  | 7.85133100  | -1.46155800 |
| H | -0.91079800 | -3.66937300 | 3.38510500  | H | 4.67145000  | 7.01787700  | -0.96259400 |
| H | -2.41776000 | -3.08621100 | 2.68024200  | C | 4.24266900  | -1.57853400 | 0.29960300  |
| H | -2.85465900 | -1.30233900 | 4.53578000  | H | 3.69667000  | -2.03166500 | -0.53619200 |
| H | -1.56907900 | -2.24648100 | 5.29230800  | H | 3.70243300  | -1.80471700 | 1.22878900  |
| H | -1.44218000 | -0.48988100 | 5.23977200  | C | 5.67244200  | -2.09581800 | 0.36886100  |
| H | 0.86043800  | -0.53388400 | 4.00443200  | H | 6.19326100  | -1.81314500 | -0.55531800 |
| H | 0.75022000  | -2.26754700 | 4.34062700  | H | 6.19184900  | -1.58823300 | 1.19200400  |
| H | 1.07040100  | -1.68839300 | 2.68985200  | C | 5.73514800  | -3.61643700 | 0.56448100  |
| H | -1.39899800 | 2.28426300  | -3.44273800 | H | 5.20178200  | -4.11353200 | -0.25825500 |
| H | -2.45361300 | 1.62869300  | -2.17915900 | H | 5.19978600  | -3.88949600 | 1.48505300  |
| H | -0.70781000 | 1.73686900  | -1.89965500 | C | 7.17094900  | -4.14748700 | 0.63453200  |
| H | -2.20567100 | -1.04766100 | -4.89455400 | H | 7.18755500  | -5.23436100 | 0.77422000  |
| H | -3.33197900 | 0.00362500  | -4.02559500 | H | 7.72194500  | -3.92007300 | -0.28612000 |

H 7.71986100 -3.69451100 1.46905000  
 13  
 Zero-point correction= 0.912443 (Hartree/Particle)  
 Thermal correction to Energy= 0.965236  
 Thermal correction to Enthalpy= 0.966180  
 Thermal correction to Gibbs Free Energy=0.823148  
 E(Solv)= -2711.23539894

|    |             |             |             |
|----|-------------|-------------|-------------|
| Pd | -0.36198900 | 0.34059000  | 0.54218800  |
| P  | -2.07187300 | 1.75899900  | 0.05777900  |
| P  | -1.36448500 | -1.89104400 | 0.81313600  |
| C  | -3.80217100 | 0.99508700  | -0.03948200 |
| C  | -4.12723900 | -0.12969900 | -1.00631800 |
| C  | -4.86598000 | 0.18659400  | -2.15912400 |
| C  | -5.30066300 | -0.78021600 | -3.06164700 |
| C  | -5.03604800 | -2.12070300 | -2.79583800 |
| C  | -4.34956800 | -2.45808400 | -1.63248500 |
| C  | -3.86636400 | -1.49541700 | -0.72999600 |
| C  | -3.23848500 | -1.98330500 | 0.56343200  |
| C  | -1.73500400 | 2.59189300  | -1.64565100 |
| C  | -1.23881200 | 1.46590200  | -2.58394900 |
| C  | -2.96959200 | 3.26638800  | -2.27734400 |
| C  | -0.61474600 | 3.64614600  | -1.53441300 |
| C  | -2.35946500 | 3.08475400  | 1.43649300  |
| C  | -2.98938800 | 2.38148500  | 2.66031700  |
| C  | -3.28978600 | 4.23691700  | 1.00598200  |
| C  | -1.01059800 | 3.67436900  | 1.90139000  |
| C  | -0.61737000 | -3.18849600 | -0.39584100 |
| C  | -0.47801200 | -2.46667100 | -1.75720200 |
| C  | -1.47714100 | -4.45422000 | -0.58436800 |
| C  | 0.79003500  | -3.62377000 | 0.06500000  |
| C  | -1.21920300 | -2.49654800 | 2.64088600  |
| C  | -1.63161200 | -3.96445100 | 2.86151600  |
| C  | 0.22975200  | -2.28785700 | 3.13463800  |
| C  | -2.12598400 | -1.59985200 | 3.51391800  |
| H  | -3.97686600 | 0.64676300  | 0.98218800  |
| H  | -4.50929800 | 1.81449200  | -0.20879100 |
| H  | -5.14162000 | 1.22126000  | -2.33541900 |
| H  | -5.86431400 | -0.48720500 | -3.94285800 |
| H  | -5.38609400 | -2.90092500 | -3.46582800 |
| H  | -4.21283200 | -3.50828700 | -1.39639000 |
| H  | -3.56151400 | -3.01445600 | 0.73988200  |
| H  | -3.64029700 | -1.39340300 | 1.39262500  |
| H  | -0.29058400 | 1.04049800  | -2.24014600 |

|   |             |             |             |
|---|-------------|-------------|-------------|
| H | -1.97096100 | 0.65861400  | -2.68346500 |
| H | -1.07574000 | 1.89113600  | -3.58358800 |
| H | -3.40604500 | 4.04623600  | -1.64926900 |
| H | -2.66016100 | 3.74115100  | -3.21722200 |
| H | -3.74831800 | 2.54681000  | -2.52874100 |
| H | -0.33481900 | 3.95540400  | -2.54951500 |
| H | -0.93579600 | 4.54500200  | -0.99844100 |
| H | 0.28184300  | 3.24510800  | -1.05515000 |
| H | -2.41801500 | 1.49632300  | 2.95612200  |
| H | -2.98058300 | 3.07742000  | 3.50863000  |
| H | -4.03132200 | 2.08997700  | 2.49563300  |
| H | -4.25378900 | 3.88589300  | 0.62218000  |
| H | -3.50126500 | 4.86672800  | 1.87999400  |
| H | -2.83105900 | 4.87952800  | 0.24978000  |
| H | -0.46577000 | 4.17451200  | 1.09857100  |
| H | -1.20645100 | 4.41805800  | 2.68542500  |
| H | -0.35868500 | 2.90100800  | 2.31549900  |
| H | -0.10219700 | -3.18426400 | -2.49941900 |
| H | -1.43673500 | -2.08561800 | -2.12413300 |
| H | 0.23310600  | -1.63669900 | -1.70688200 |
| H | -1.68223500 | -4.97792800 | 0.35285700  |
| H | -2.42691700 | -4.24345900 | -1.07756200 |
| H | -0.92918300 | -5.15045900 | -1.23285200 |
| H | 1.25476400  | -4.19119000 | -0.75253400 |
| H | 1.43488100  | -2.77439200 | 0.29492800  |
| H | 0.75015200  | -4.28915600 | 0.93353100  |
| H | -1.61139300 | -4.18340900 | 3.93772600  |
| H | -2.64699500 | -4.17723500 | 2.50817700  |
| H | -0.94470400 | -4.66379700 | 2.37780600  |
| H | 0.55669700  | -1.25255600 | 3.01302400  |
| H | 0.27478100  | -2.54743300 | 4.20131200  |
| H | 0.95122500  | -2.91313400 | 2.60833800  |
| H | -1.92495700 | -0.53746700 | 3.34322100  |
| H | -3.19357600 | -1.78636400 | 3.35817900  |
| H | -1.91534600 | -1.80825100 | 4.57057800  |
| P | 2.64898200  | -0.09639200 | -0.17559700 |
| O | 1.54995400  | -0.52210000 | 0.82542800  |
| O | 2.28349300  | 0.20799200  | -1.59688800 |
| H | 0.35448300  | 1.72968100  | 0.41662400  |
| O | 3.51369500  | 1.12810600  | 0.49429200  |
| O | 3.70826500  | -1.32745200 | -0.01857400 |
| C | 3.52012600  | 2.43355200  | -0.09789600 |
| H | 2.60662700  | 2.96790700  | 0.19976400  |
| H | 3.51686500  | 2.34436500  | -1.18974200 |

|   |            |             |             |   |             |             |             |
|---|------------|-------------|-------------|---|-------------|-------------|-------------|
| C | 4.75248800 | 3.18240500  | 0.39535000  | C | 2.99454700  | -2.53169000 | -1.76790600 |
| H | 4.74175200 | 3.19871800  | 1.49348300  | C | 2.24329000  | -2.21333300 | 1.63207000  |
| H | 5.64925500 | 2.62095600  | 0.09972800  | C | 1.61779200  | -1.75350500 | 2.96736400  |
| C | 4.82890700 | 4.61474300  | -0.14911200 | C | 3.74991000  | -2.45165100 | 1.86334600  |
| H | 3.92318200 | 5.16540800  | 0.14374000  | C | 1.57008200  | -3.54640100 | 1.24234800  |
| H | 4.82745200 | 4.58878800  | -1.24809600 | C | -2.27993100 | 2.15225100  | -1.00508400 |
| C | 6.06576000 | 5.37561300  | 0.34071700  | C | -1.35243800 | 2.04193800  | -2.23726100 |
| H | 6.09428300 | 6.39500600  | -0.06145500 | C | -2.50014900 | 3.64545600  | -0.68725500 |
| H | 6.07815200 | 5.44736300  | 1.43526600  | C | -3.65240300 | 1.54417800  | -1.35769700 |
| H | 6.98884200 | 4.86928200  | 0.03289300  | C | -2.62074900 | 0.89856200  | 1.89485900  |
| C | 4.89631100 | -1.31413100 | -0.82222500 | C | -3.41729000 | 2.16063400  | 2.28044500  |
| H | 5.52197400 | -0.46039700 | -0.52721800 | C | -3.59749300 | -0.24851700 | 1.57523500  |
| H | 4.62294700 | -1.18875900 | -1.87761300 | C | -1.79184600 | 0.45668700  | 3.12138700  |
| C | 5.63982300 | -2.62498600 | -0.60088400 | H | 1.83656600  | 0.71197900  | 2.08685500  |
| H | 5.85277700 | -2.73250100 | 0.47105800  | H | 3.46273300  | 0.56014600  | 1.45961200  |
| H | 4.97660000 | -3.45656700 | -0.87451300 | H | 4.39420400  | 2.11887000  | 0.03554700  |
| C | 6.94326800 | -2.70744700 | -1.40584600 | H | 4.36177100  | 4.32509900  | -1.03902700 |
| H | 7.59527600 | -1.86551600 | -1.13272300 | H | 2.22272800  | 5.62438700  | -1.11185100 |
| H | 6.72086500 | -2.58585400 | -2.47549700 | H | 0.20714100  | 4.68498400  | -0.08249600 |
| C | 7.69636200 | -4.02441300 | -1.18904800 | H | -0.73946200 | 3.22974500  | 1.46954800  |
| H | 8.62263300 | -4.05671400 | -1.77436400 | H | 0.11588100  | 1.84471200  | 2.09671700  |
| H | 7.96310900 | -4.15829800 | -0.13347000 | H | 1.44978000  | -0.40711700 | -2.61693600 |
| H | 7.08323400 | -4.88416500 | -1.48620000 | H | 2.49348700  | 0.90343700  | -2.04088600 |

14-ts

Zero-point correction= 0.759767 (Hartree/Particle)

Thermal correction to Energy= 0.801255

Thermal correction to Enthalpy= 0.802199

Thermal correction to Gibbs Free Energy= 0.690055

E(Solv)= -1948.13224241

|    |             |             |             |   |             |             |             |
|----|-------------|-------------|-------------|---|-------------|-------------|-------------|
| Pd | -0.38672400 | -0.95014200 | -0.42840500 | H | 3.10226600  | -0.24815900 | -3.23767900 |
| P  | 1.87573800  | -0.87299200 | 0.29051800  | H | 4.96668900  | -1.33130100 | -0.20052100 |
| P  | -1.42223400 | 1.14402000  | 0.39677800  | H | 5.07087500  | -0.86376600 | -1.89526100 |
| C  | 2.41902900  | 0.70793400  | 1.16181100  | H | 4.62385700  | 0.33436200  | -0.69253300 |
| C  | 2.28664700  | 2.04894200  | 0.46538200  | H | 3.53783400  | -2.56421100 | -2.72006600 |
| C  | 3.44810200  | 2.64209200  | -0.05691600 | H | 3.48599500  | -3.23695500 | -1.09245900 |
| C  | 3.44135300  | 3.90333700  | -0.64671600 | H | 1.97933600  | -2.89039200 | -1.96415800 |
| C  | 2.25204400  | 4.62601100  | -0.68586600 | H | 0.56173800  | -1.49050100 | 2.85773000  |
| C  | 1.10299200  | 4.07526700  | -0.12390500 | H | 1.67485700  | -2.58245000 | 3.68285800  |
| C  | 1.07977200  | 2.78938800  | 0.44183600  | H | 2.14699000  | -0.90784400 | 3.41588200  |
| C  | -0.17608000 | 2.34114500  | 1.16823400  | H | 4.29471500  | -1.53025700 | 2.09304200  |
| C  | 3.02898100  | -1.08248400 | -1.24037600 | H | 3.86888400  | -3.11846700 | 2.72616600  |
| C  | 2.47718700  | -0.14719800 | -2.34153300 | H | 4.23352400  | -2.93874100 | 1.01305200  |
| C  | 4.50257100  | -0.71199000 | -0.96949800 | H | 1.92511600  | -3.94384900 | 0.28885700  |
|    |             |             |             | H | 1.79627800  | -4.29350600 | 2.01302700  |
|    |             |             |             | H | 0.48161200  | -3.44370100 | 1.18724400  |
|    |             |             |             | H | -1.78596300 | 2.61385100  | -3.06755400 |
|    |             |             |             | H | -0.35467200 | 2.44577600  | -2.04096200 |
|    |             |             |             | H | -1.23807700 | 1.00424000  | -2.56939300 |
|    |             |             |             | H | -3.09908800 | 3.80963100  | 0.21038600  |
|    |             |             |             | H | -1.56374900 | 4.19212800  | -0.58284000 |



|          |                    |                    |                    |   |             |             |             |
|----------|--------------------|--------------------|--------------------|---|-------------|-------------|-------------|
| H        | -3.04114000        | 4.10077700         | -1.52629300        | C | -1.80008900 | -1.39034000 | 0.00468300  |
| H        | -4.00474000        | 1.99274200         | -2.29500200        | C | 3.99864100  | -2.56374900 | 0.34503100  |
| H        | -3.61374700        | 0.46368900         | -1.50189600        | C | 4.02491000  | -2.26758900 | 1.86313300  |
| H        | -4.40669300        | 1.75676300         | -0.59520200        | C | 3.86677800  | -4.08469900 | 0.12169700  |
| H        | -3.97605100        | 1.95469800         | 3.20213600         | C | 5.36202600  | -2.12235700 | -0.22618100 |
| H        | -2.77473700        | 3.02390800         | 2.48195600         | C | 2.73610200  | -1.40427800 | -2.32253800 |
| H        | -4.14928200        | 2.44308900         | 1.51968100         | C | 1.43269500  | -0.77440800 | -2.86570600 |
| H        | -3.06437900        | -1.18316600        | 1.37936700         | C | 2.95890800  | -2.76085900 | -3.01718000 |
| H        | -4.25152700        | -0.41127900        | 2.44131800         | C | 3.87675400  | -0.43589000 | -2.70366300 |
| H        | -4.23697000        | -0.04281900        | 0.71619200         | C | -3.23577000 | -0.75183700 | -2.43756500 |
| H        | -1.13523700        | -0.38693700        | 2.88785500         | C | -2.11888600 | 0.14769200  | -3.01640700 |
| H        | -1.19042600        | 1.26459600         | 3.54784600         | C | -4.11618400 | 0.11374600  | -1.51388500 |
| H        | -2.48093600        | 0.12478500         | 3.90731600         | C | -4.09191600 | -1.24511500 | -3.62069200 |
| H        | 0.32373100         | -2.26037600        | -0.93296100        | C | -3.57234000 | -3.61810800 | -1.11638100 |
| C        | -2.92527300        | -3.84959500        | -0.10970500        | C | -4.80772200 | -3.15968400 | -0.32380000 |
| C        | -3.31015500        | -2.68047500        | -0.98573500        | C | -4.02112600 | -4.35698700 | -2.39771400 |
| H        | -2.50677100        | -4.67614100        | -0.69832300        | C | -2.78388600 | -4.64931700 | -0.27494600 |
| H        | -2.16648200        | -3.56474400        | 0.63055200         | H | 0.37558800  | -2.29401500 | -1.08562800 |
| H        | -3.79507600        | -4.23796400        | 0.42612700         | H | 1.35079300  | -3.63775700 | -0.56732600 |
| C        | -4.59546200        | -2.32174700        | -1.15559500        | H | 1.64215200  | -3.97694000 | 1.98709700  |
| H        | -5.40340300        | -2.85631000        | -0.66493600        | H | 0.39125000  | -4.22450400 | 4.07796500  |
| H        | -4.88404500        | -1.50342100        | -1.80961700        | H | -1.85014500 | -3.12568700 | 4.31180500  |
| C        | -2.26126500        | -1.97389100        | -1.74028600        | H | -2.78216400 | -1.87537400 | 2.40058200  |
| C        | -1.04423600        | -2.54422800        | -2.08903400        | H | -1.15502800 | -0.56652600 | -0.31736400 |
| H        | -0.83666300        | -3.58083600        | -1.83975100        | H | -2.68106700 | -0.92106500 | 0.44974100  |
| H        | -0.49137400        | -2.15044200        | -2.93681800        | H | 4.25943600  | -1.21648900 | 2.05045800  |
| <u>H</u> | <u>-2.57833400</u> | <u>-1.10435500</u> | <u>-2.30797700</u> | H | 3.07443400  | -2.48015500 | 2.35664700  |

15-ts

Zero-point correction=1.024613 (Hartree/Particle)

Thermal correction to Energy=1.084476

Thermal correction to Enthalpy=1.085420

Thermal correction to Gibbs Free Energy=0.925103

E(Solv) = -2906.59529205

|    |             |             |             |
|----|-------------|-------------|-------------|
| Pd | 2.49758200  | 0.71529200  | 0.46076700  |
| P  | 2.55791800  | -1.49851300 | -0.39530400 |
| P  | -2.31090500 | -2.24764000 | -1.61819500 |
| C  | 1.02320800  | -2.63316000 | -0.27914400 |
| C  | 0.20109100  | -2.72704400 | 0.99564700  |
| C  | 0.68345400  | -3.48006400 | 2.07904000  |
| C  | -0.02729800 | -3.63458300 | 3.26695600  |
| C  | -1.27574900 | -3.03021300 | 3.39414900  |
| C  | -1.79232900 | -2.31828700 | 2.31477200  |
| C  | -1.09593800 | -2.16510300 | 1.10143200  |

|   |             |             |             |
|---|-------------|-------------|-------------|
| H | 3.82114300  | -4.35065800 | -0.93784200 |
| H | 4.74863700  | -4.58318900 | 0.54611600  |
| H | 6.15967500  | -2.58574300 | 0.37013100  |
| H | 5.50546500  | -2.44572000 | -1.26119900 |
| H | 5.49861400  | -1.03939900 | -0.17542000 |
| H | 1.16504900  | 0.13693800  | -2.31973000 |
| H | 1.58586900  | -0.50049500 | -3.91810500 |
| H | 0.58089600  | -1.45884900 | -2.83644100 |
| H | 2.18382200  | -3.49192900 | -2.76435100 |
| H | 2.92631600  | -2.61890400 | -4.10607300 |
| H | 3.93453000  | -3.19547900 | -2.77897700 |
| H | 4.86374600  | -0.78631200 | -2.39814800 |
| H | 3.89278300  | -0.32231700 | -3.79604100 |
| H | 3.71202500  | 0.55162100  | -2.26230200 |
| H | -2.57520200 | 1.00140100  | -3.53728600 |

|   |             |             |             |
|---|-------------|-------------|-------------|
| H | -1.46387900 | 0.55806900  | -2.24136500 |
| H | -1.50010500 | -0.39265500 | -3.74046000 |
| H | -4.89894700 | -0.46426800 | -1.01410600 |
| H | -3.53113500 | 0.63535400  | -0.75089600 |
| H | -4.61633000 | 0.88640500  | -2.11530700 |
| H | -4.39110900 | -0.38524500 | -4.23565100 |
| H | -3.54315800 | -1.93910400 | -4.26762600 |
| H | -5.01091800 | -1.73706200 | -3.28803800 |
| H | -5.38867800 | -4.03389900 | 0.00377500  |
| H | -4.53397600 | -2.59574100 | 0.57465900  |
| H | -5.47507700 | -2.53638500 | -0.92749600 |
| H | -3.16006900 | -4.67793300 | -2.99519500 |
| H | -4.58498800 | -5.25721700 | -2.11687400 |
| H | -4.66938300 | -3.75411700 | -3.03631100 |
| H | -1.86301500 | -4.96266500 | -0.78075200 |
| H | -2.51634500 | -4.27196000 | 0.71302800  |
| H | -3.40469900 | -5.54489300 | -0.13337300 |
| C | 3.57410100  | 3.60227400  | -0.35288900 |
| C | 3.70187700  | 2.58685200  | 0.76736300  |
| H | 2.54186400  | 3.94731300  | -0.48001300 |
| H | 4.19266500  | 4.48922100  | -0.15147000 |
| H | 3.90134400  | 3.17565400  | -1.30599900 |
| C | 4.46406200  | 1.38249800  | 0.58534600  |
| H | 5.06869400  | 1.29863600  | -0.31685900 |
| H | 4.93246400  | 0.92811200  | 1.46019400  |
| C | 3.21673200  | 2.90994200  | 2.06456000  |
| C | 2.45688400  | 4.02673200  | 2.42805500  |
| H | 3.42109200  | 2.17134000  | 2.84141700  |
| P | -0.51400900 | 2.31668900  | 0.86049300  |
| O | 0.27006600  | 1.04003800  | 0.71668000  |
| O | -0.03132200 | 3.37039500  | 1.89916700  |
| H | 1.09640100  | 3.57562500  | 2.11356200  |
| O | -0.65589900 | 2.99900600  | -0.59307900 |
| O | -2.06882400 | 2.04679100  | 1.22812700  |
| C | -1.36457600 | 4.24867000  | -0.75394200 |
| H | -0.95959800 | 4.98274300  | -0.04777500 |
| H | -2.42204800 | 4.08600300  | -0.51520400 |
| C | -1.19140400 | 4.71197300  | -2.19290200 |
| H | -0.11950000 | 4.82698500  | -2.40186100 |
| H | -1.56067700 | 3.92541700  | -2.86399800 |
| C | -1.92542400 | 6.03028000  | -2.47389800 |
| H | -1.55820500 | 6.80697900  | -1.78831600 |
| H | -2.99497600 | 5.90780300  | -2.25195300 |
| C | -1.75673400 | 6.50662400  | -3.92058100 |

|   |             |            |             |
|---|-------------|------------|-------------|
| H | -2.29014600 | 7.44795100 | -4.09425500 |
| H | -0.69972400 | 6.67175000 | -4.16212100 |
| H | -2.14637700 | 5.76569400 | -4.62920100 |
| C | -2.41688500 | 1.66070600 | 2.57901100  |
| H | -1.99580500 | 0.66874700 | 2.78140100  |
| H | -1.97261400 | 2.37837600 | 3.27732000  |
| C | -3.93396400 | 1.64994900 | 2.69767600  |
| H | -4.34752300 | 0.95288700 | 1.95650200  |
| H | -4.31560900 | 2.64643300 | 2.43876000  |
| C | -4.40480000 | 1.25739800 | 4.10491800  |
| H | -4.00574500 | 0.26566100 | 4.36090200  |
| H | -3.97986000 | 1.95538500 | 4.83971800  |
| C | -5.93129300 | 1.24305300 | 4.23827400  |
| H | -6.38366200 | 0.52872800 | 3.53953600  |
| H | -6.23955200 | 0.96029200 | 5.25108400  |
| H | -6.35650900 | 2.23088700 | 4.02312200  |
| H | 2.35821500  | 4.23887800 | 3.49167300  |
| H | 2.48836400  | 4.90938900 | 1.78890000  |

16

Zero-point correction= 0.323415 (Hartree/Particle)

Thermal correction to Energy= 0.340444

Thermal correction to Enthalpy=0.341388

Thermal correction to Gibbs Free Energy=0.278861

E(Solv)= -642.663413811

|   |             |             |             |
|---|-------------|-------------|-------------|
| C | -1.92415000 | -0.80823800 | -0.37010900 |
| C | -1.90084300 | 0.46120300  | 0.26582100  |
| C | -3.07533600 | 1.12941000  | 0.64948600  |
| C | -4.27249100 | 0.48879800  | 0.37625200  |
| C | -4.31798300 | -0.77803500 | -0.25842000 |
| C | -3.15953400 | -1.43375400 | -0.63420400 |
| C | -0.55827900 | -1.13683000 | -0.58318900 |
| H | -3.04710400 | 2.09980400  | 1.13491300  |
| H | -5.20507400 | 0.97054900  | 0.65574400  |
| H | -5.28346300 | -1.23631600 | -0.45008500 |
| H | -3.19664200 | -2.40402500 | -1.12035300 |
| H | -0.11319500 | -2.01103300 | -1.03217200 |
| N | 0.21852000  | -0.16472800 | -0.12687600 |
| N | -0.58611800 | 0.80254600  | 0.38353100  |
| H | -0.14702900 | 1.60846300  | 0.80389700  |
| B | 1.86672200  | 0.02693200  | -0.16114700 |
| C | 2.18605300  | 0.95647800  | -1.47871900 |
| C | 1.65304400  | 2.39913500  | -1.51922400 |
| H | 1.84731700  | 0.43419200  | -2.38845000 |

|   |            |             |             |
|---|------------|-------------|-------------|
| H | 3.28246900 | 1.00101700  | -1.56880900 |
| H | 0.55419000 | 2.43380900  | -1.50864100 |
| H | 2.00799000 | 2.98859100  | -0.66351300 |
| H | 1.97070800 | 2.93220400  | -2.42542000 |
| C | 2.27382400 | 0.74828200  | 1.25494100  |
| C | 2.00251500 | -0.04196900 | 2.54761100  |
| H | 1.83049100 | 1.75694800  | 1.36274800  |
| H | 3.35214000 | 0.95912300  | 1.19457300  |
| H | 2.32575700 | 0.49976100  | 3.44678200  |
| H | 0.93432200 | -0.26803100 | 2.67457100  |
| H | 2.52804400 | -1.00398100 | 2.54099700  |
| C | 2.46184700 | -1.48869200 | -0.33455900 |
| C | 3.99688600 | -1.57674300 | -0.25817000 |
| H | 2.15575000 | -1.91334300 | -1.30651600 |
| H | 2.04415000 | -2.16869800 | 0.42626800  |
| H | 4.35881900 | -2.60363100 | -0.40172800 |
| H | 4.47473700 | -0.95487600 | -1.02499200 |
| H | 4.37188200 | -1.23418200 | 0.71424000  |

|   |             |             |             |
|---|-------------|-------------|-------------|
| H | -0.10501900 | -1.60993100 | 2.17958200  |
| H | 1.10842800  | -2.73146200 | 1.55450700  |
| H | 1.22132300  | -2.13957800 | 3.21336000  |
| C | 1.71243700  | -1.28069300 | -0.98125000 |
| C | 1.43789900  | -0.86155300 | -2.43627700 |
| H | 1.08942200  | -2.15678500 | -0.74580000 |
| H | 2.74019000  | -1.67138400 | -0.92181300 |
| H | 1.57909300  | -1.68964800 | -3.14409700 |
| H | 0.40966800  | -0.49844900 | -2.56853300 |
| H | 2.10449200  | -0.04942600 | -2.75296100 |
| C | 2.59305000  | 1.16617000  | -0.14102000 |
| C | 4.07554200  | 0.79094600  | -0.32066600 |
| H | 2.56338800  | 1.90121100  | 0.68976900  |
| H | 2.28150500  | 1.71873400  | -1.04459000 |
| H | 4.70997800  | 1.67510100  | -0.46726000 |
| H | 4.46126500  | 0.25355600  | 0.55356300  |
| H | 4.21718800  | 0.14009500  | -1.19086200 |
| H | 0.72769500  | 2.39826500  | 0.42781200  |

16-iso

Zero-point correction= 0.323830 (Hartree/Particle)

Thermal correction to Energy= 0.340628

Thermal correction to Enthalpy= 0.341572

Thermal correction to Gibbs Free Energy= 0.279969

E(Solv)=-642.65639320

|   |             |             |             |
|---|-------------|-------------|-------------|
| C | -2.16361500 | 1.09712000  | 0.09891600  |
| C | -1.21125000 | 0.03157100  | -0.03223400 |
| C | -1.64976700 | -1.29484300 | -0.27117900 |
| C | -3.00603500 | -1.50778300 | -0.37349200 |
| C | -3.95582400 | -0.45179300 | -0.24518000 |
| C | -3.55359700 | 0.84168600  | -0.01072700 |
| C | -1.39379200 | 2.24407100  | 0.32367800  |
| H | -0.93989900 | -2.10512800 | -0.36575600 |
| H | -3.36890200 | -2.51510300 | -0.55714100 |
| H | -5.01334300 | -0.68205500 | -0.33494000 |
| H | -4.27358500 | 1.64855600  | 0.08888800  |
| H | -1.66094200 | 3.27935600  | 0.47538000  |
| N | -0.11378700 | 1.84582700  | 0.31685500  |
| N | 0.04889500  | 0.52421100  | 0.10484300  |
| B | 1.60251700  | -0.11983200 | 0.16246400  |
| C | 1.81762800  | -0.66103300 | 1.69580600  |
| C | 0.96761300  | -1.84490100 | 2.18580500  |
| H | 1.69014900  | 0.17491500  | 2.40541300  |
| H | 2.87781900  | -0.94573400 | 1.78819200  |

17-ts

Zero-point correction=1.070491 (Hartree/Particle)

Thermal correction to Energy= 1.130131

Thermal correction to Enthalpy=1.131075

Thermal correction to Gibbs Free Energy= 0.975315

E(Solv)= -2590.33846816

|    |            |             |             |
|----|------------|-------------|-------------|
| Pd | 1.31431100 | -0.31721700 | 0.38428400  |
| P  | 3.38013700 | -1.51816200 | 0.60166100  |
| P  | 1.95944200 | 2.03072600  | 0.07499900  |
| C  | 4.94907800 | -0.46026800 | 0.46583300  |
| C  | 5.24956800 | 0.40022500  | -0.74797900 |
| C  | 6.20204800 | -0.06210400 | -1.67235700 |
| C  | 6.65074100 | 0.71082100  | -2.73988400 |
| C  | 6.18144100 | 2.01438700  | -2.87524100 |
| C  | 5.26589900 | 2.50375900  | -1.94773900 |
| C  | 4.75581400 | 1.72013400  | -0.89812000 |
| C  | 3.82517800 | 2.38309400  | 0.09979400  |
| C  | 3.62069600 | -2.92429700 | -0.70233200 |
| C  | 3.18323800 | -2.31631800 | -2.05484900 |
| C  | 5.06097800 | -3.45706400 | -0.84536100 |
| C  | 2.70935000 | -4.12935500 | -0.39091400 |
| C  | 3.64430800 | -2.21448800 | 2.39608300  |
| C  | 3.84214200 | -1.01494400 | 3.35159700  |
| C  | 4.85179000 | -3.16081400 | 2.54684600  |
| C  | 2.37383000 | -2.95029300 | 2.86825400  |

|   |             |             |             |   |             |             |             |
|---|-------------|-------------|-------------|---|-------------|-------------|-------------|
| C | 1.34937200  | 2.72495600  | -1.61859600 | H | 2.57700700  | 4.97119900  | 0.96260100  |
| C | 1.62932900  | 1.61254600  | -2.65552000 | H | 0.87210900  | 5.05523300  | 0.47467900  |
| C | 2.02576500  | 4.02564700  | -2.09437000 | H | -0.21631700 | 1.83255700  | 2.10573500  |
| C | -0.17087900 | 2.96772800  | -1.57180100 | H | -0.38728800 | 3.48915900  | 2.71320100  |
| C | 1.39402400  | 3.18903200  | 1.51772900  | H | -0.76151400 | 3.12007800  | 1.02788300  |
| C | 1.55572200  | 4.69717400  | 1.24891000  | H | 2.21276200  | 1.74674200  | 2.96547100  |
| C | -0.08132000 | 2.88626600  | 1.84817600  | H | 3.26324500  | 3.15887400  | 2.70480100  |
| C | 2.22318600  | 2.82453100  | 2.77037400  | H | 1.78072000  | 3.32002900  | 3.64372000  |
| H | 4.88613500  | 0.19004500  | 1.34157900  | C | -1.38035600 | -0.89786100 | 2.24303000  |
| H | 5.80478500  | -1.12079800 | 0.64047000  | C | -0.91352200 | -0.98511800 | 0.80369800  |
| H | 6.63989700  | -1.04392800 | -1.52756300 | H | -1.44893300 | 0.13334500  | 2.60200600  |
| H | 7.38607700  | 0.30872900  | -3.43094200 | H | -2.38504700 | -1.32976000 | 2.33711700  |
| H | 6.54351700  | 2.65685600  | -3.67277900 | H | -0.71205700 | -1.44871200 | 2.91141900  |
| H | 4.96234400  | 3.54299300  | -2.01786800 | C | 0.01094400  | -1.99955500 | 0.41376000  |
| H | 3.95974500  | 3.46767900  | 0.03283800  | H | 0.22651700  | -2.78895400 | 1.12636100  |
| H | 4.12738400  | 2.10176500  | 1.11274400  | H | -0.00213100 | -2.33224600 | -0.62539200 |
| H | 2.14179700  | -1.98155700 | -2.02677200 | C | -1.53888100 | -0.19932500 | -0.19086800 |
| H | 3.80464200  | -1.46362400 | -2.34374700 | C | -2.64055300 | 0.67963800  | 0.00153700  |
| H | 3.27535200  | -3.07883900 | -2.83971000 | C | -6.18975700 | -2.27643700 | -1.40281600 |
| H | 5.76299800  | -2.68835400 | -1.16670500 | C | -4.89875000 | -1.98625400 | -0.87112500 |
| H | 5.44277000  | -3.90927100 | 0.07178900  | C | -3.82287100 | -2.88190400 | -1.06930300 |
| H | 5.06715000  | -4.23634500 | -1.61876900 | C | -4.06556600 | -4.02996900 | -1.80202100 |
| H | 2.74746700  | -4.82379900 | -1.24034000 | C | -5.34834000 | -4.32008400 | -2.33757900 |
| H | 3.04236000  | -4.68405600 | 0.49134500  | C | -6.41145600 | -3.45830600 | -2.14047100 |
| H | 1.66608700  | -3.84451700 | -0.24890900 | C | -6.97403400 | -1.17808900 | -0.99433700 |
| H | 3.07250400  | -0.24967400 | 3.20716300  | H | -2.84332300 | -2.68812600 | -0.64292700 |
| H | 3.76252500  | -1.37121100 | 4.38638800  | H | -3.25628400 | -4.73793800 | -1.96619600 |
| H | 4.82614800  | -0.54750800 | 3.25060600  | H | -5.49135200 | -5.23793500 | -2.90166800 |
| H | 5.78556400  | -2.72394700 | 2.17813900  | H | -7.39611500 | -3.68683200 | -2.54071100 |
| H | 4.99809300  | -3.38141100 | 3.61252200  | H | -8.02029500 | -0.97570800 | -1.15689600 |
| H | 4.69442300  | -4.11727600 | 2.04084900  | N | -6.21713400 | -0.32600300 | -0.29487300 |
| H | 2.10913600  | -3.79978000 | 2.23491000  | N | -4.94238100 | -0.80762300 | -0.19252000 |
| H | 2.54376800  | -3.33680400 | 3.88162800  | H | -3.72783500 | -0.02674000 | -0.06361800 |
| H | 1.51860800  | -2.27115500 | 2.90890200  | H | -1.25495600 | -0.42492400 | -1.21980200 |
| H | 1.28088900  | 1.94481400  | -3.64252600 | H | -2.81551400 | 1.40217600  | -0.79681100 |
| H | 2.69502000  | 1.38012700  | -2.73834000 | H | -2.74824200 | 1.11759000  | 0.99501700  |
| H | 1.09797500  | 0.68885000  | -2.40229100 | B | -6.74510000 | 1.03295300  | 0.46935000  |
| H | 1.91827600  | 4.84865000  | -1.38501000 | C | -6.77214300 | 0.69607500  | 2.08312900  |
| H | 3.08503700  | 3.88886600  | -2.30872700 | C | -5.44128800 | 0.48565000  | 2.82430800  |
| H | 1.54909400  | 4.34129400  | -3.03181300 | H | -7.40659700 | -0.18954700 | 2.25574700  |
| H | -0.53404400 | 3.13319700  | -2.59453400 | H | -7.30268000 | 1.52491700  | 2.57928400  |
| H | -0.71506800 | 2.11677200  | -1.16004200 | H | -4.88121400 | -0.35972800 | 2.40492100  |
| H | -0.43214900 | 3.85739000  | -0.99114200 | H | -4.79644100 | 1.37248000  | 2.75197000  |
| H | 1.31900700  | 5.25036500  | 2.16744800  | H | -5.58622100 | 0.28225500  | 3.89599400  |

|          |                    |                   |                   |
|----------|--------------------|-------------------|-------------------|
| C        | -5.74508200        | 2.27592700        | 0.08687400        |
| C        | -5.60272600        | 2.60924000        | -1.40837000       |
| H        | -4.74162700        | 2.13110900        | 0.51011800        |
| H        | -6.12824400        | 3.16944700        | 0.60515800        |
| H        | -4.93088100        | 3.46131900        | -1.59511500       |
| H        | -5.20902800        | 1.75431200        | -1.97584900       |
| H        | -6.57189100        | 2.86200200        | -1.85679800       |
| C        | -8.28232100        | 1.28657900        | -0.07427000       |
| C        | -8.92559100        | 2.60199900        | 0.40033900        |
| H        | -8.94411000        | 0.46344300        | 0.24691800        |
| H        | -8.32357900        | 1.27916700        | -1.17680700       |
| H        | -9.96373500        | 2.70551500        | 0.05318400        |
| H        | -8.94370300        | 2.67171000        | 1.49532100        |
| <u>H</u> | <u>-8.37440000</u> | <u>3.47675200</u> | <u>0.03289200</u> |

18-ts

Zero-point correction=1.076000 (Hartree/Particle)

Thermal correction to Energy=1.135243

Thermal correction to Enthalpy=1.136187

Thermal correction to Gibbs Free Energy= 0.984666

E(solvent)= -2590.34543989

|    |             |             |             |
|----|-------------|-------------|-------------|
| Pd | -0.70881500 | 0.00574500  | -0.28228100 |
| P  | -1.86566500 | 1.97853000  | 0.46868300  |
| P  | -2.22697200 | -1.85670700 | 0.21346100  |
| C  | -3.63640200 | 1.67883700  | 1.09524600  |
| C  | -4.69462200 | 0.98389200  | 0.25661100  |
| C  | -5.69263200 | 1.77133500  | -0.34358300 |
| C  | -6.77144500 | 1.22414000  | -1.03291300 |
| C  | -6.90322900 | -0.16025900 | -1.09549800 |
| C  | -5.95156400 | -0.95819700 | -0.46667900 |
| C  | -4.83073400 | -0.42542000 | 0.19311200  |
| C  | -3.91610100 | -1.38216200 | 0.93208600  |
| C  | -2.06542800 | 3.33178200  | -0.90275500 |
| C  | -2.39332200 | 2.56693400  | -2.20504700 |
| C  | -3.18556900 | 4.36263100  | -0.65119200 |
| C  | -0.75696600 | 4.12474000  | -1.10751400 |
| C  | -1.10996700 | 2.78221800  | 2.06438500  |
| C  | -1.28967600 | 1.78678900  | 3.23261900  |
| C  | -1.74667000 | 4.12691000  | 2.46882100  |
| C  | 0.40896600  | 2.97813300  | 1.88211900  |
| C  | -2.65267100 | -2.86517800 | -1.37747600 |
| C  | -2.96952500 | -1.81638200 | -2.46965300 |
| C  | -3.83761500 | -3.84448300 | -1.27215900 |
| C  | -1.41248800 | -3.65702600 | -1.83122500 |

|   |             |             |             |
|---|-------------|-------------|-------------|
| C | -1.61253200 | -3.04113800 | 1.62058300  |
| C | -2.39603000 | -4.36065800 | 1.75631500  |
| C | -0.12230400 | -3.36340400 | 1.39580100  |
| C | -1.71044300 | -2.27904300 | 2.96185800  |
| H | -3.47999100 | 1.09961400  | 2.00877700  |
| H | -4.03414100 | 2.64707200  | 1.41563500  |
| H | -5.64850100 | 2.84874200  | -0.22909700 |
| H | -7.51544300 | 1.87557200  | -1.48264300 |
| H | -7.75162300 | -0.61744400 | -1.59685900 |
| H | -6.10054600 | -2.03306700 | -0.45775400 |
| H | -4.46805700 | -2.30561400 | 1.13681100  |
| H | -3.66945200 | -0.95399400 | 1.90724200  |
| H | -1.58844400 | 1.87930400  | -2.48067000 |
| H | -3.31709300 | 1.98627100  | -2.11744200 |
| H | -2.52593300 | 3.28627700  | -3.02453500 |
| H | -4.17694100 | 3.91389200  | -0.68858100 |
| H | -3.07974400 | 4.89121600  | 0.29820800  |
| H | -3.14856000 | 5.11644000  | -1.44878000 |
| H | -0.84821900 | 4.71352500  | -2.02983100 |
| H | -0.57310300 | 4.83073900  | -0.29267400 |
| H | 0.12167400  | 3.48777500  | -1.21110300 |
| H | -0.92929800 | 0.78808700  | 2.96909100  |
| H | -0.69221000 | 2.13318000  | 4.08497300  |
| H | -2.32587500 | 1.71127000  | 3.57726200  |
| H | -2.83476500 | 4.07041300  | 2.57985700  |
| H | -1.33962400 | 4.42938900  | 3.44264500  |
| H | -1.51237600 | 4.92776600  | 1.76225000  |
| H | 0.66337900  | 3.63266700  | 1.04672200  |
| H | 0.81580800  | 3.43637800  | 2.79288500  |
| H | 0.92109300  | 2.02447500  | 1.74308900  |
| H | -3.15960000 | -2.33410900 | -3.41976400 |
| H | -3.85526900 | -1.22204000 | -2.23118900 |
| H | -2.12979700 | -1.13019700 | -2.61845800 |
| H | -3.66518400 | -4.64525100 | -0.55103600 |
| H | -4.77242000 | -3.34684400 | -1.01251800 |
| H | -3.98956900 | -4.31652400 | -2.25214900 |
| H | -1.59303200 | -4.06090900 | -2.83629300 |
| H | -0.52729300 | -3.01914600 | -1.88354400 |
| H | -1.19490800 | -4.50578100 | -1.17586400 |
| H | -2.05897500 | -4.88257600 | 2.66179200  |
| H | -3.47607700 | -4.20756900 | 1.85577100  |
| H | -2.21910000 | -5.03552900 | 0.91419000  |
| H | 0.48392400  | -2.45424600 | 1.36733400  |
| H | 0.24254800  | -3.98072900 | 2.22682300  |

|   |             |             |             |
|---|-------------|-------------|-------------|
| H | 0.05403800  | -3.92208800 | 0.47451100  |
| H | -1.24771200 | -1.28932500 | 2.90390100  |
| H | -2.74096900 | -2.16667000 | 3.31274600  |
| H | -1.16933000 | -2.84607600 | 3.72950900  |
| C | 0.93399400  | -0.59114700 | -3.05182400 |
| C | 1.23751900  | -0.35529800 | -1.57972900 |
| H | 1.80371700  | -0.34229700 | -3.67164100 |
| H | 0.65393100  | -1.62610500 | -3.26978300 |
| H | 0.10884800  | 0.04957500  | -3.37882600 |
| C | 1.02124000  | 0.95475100  | -1.04529400 |
| H | 1.63959000  | 1.27636800  | -0.21061800 |
| H | 0.81433400  | 1.74011800  | -1.76780200 |
| C | 2.01427100  | -1.28614900 | -0.83590500 |
| C | 2.32757700  | -2.67383400 | -1.31809000 |
| H | 3.13578100  | -3.10305000 | -0.72692500 |
| H | 1.44668800  | -3.31868700 | -1.21860300 |
| H | 2.10373500  | -1.11556200 | 0.22556300  |
| H | 2.62167600  | -2.68316400 | -2.37082500 |
| C | 5.49446400  | 1.09360700  | -1.49814800 |
| C | 4.64616300  | 0.02079700  | -1.90414100 |
| C | 4.50060800  | -0.28211200 | -3.27814000 |
| C | 5.17335000  | 0.50351000  | -4.19618900 |
| C | 6.00080500  | 1.58478700  | -3.79134700 |
| C | 6.17409400  | 1.88043300  | -2.45276500 |
| C | 5.43744100  | 1.04457300  | -0.09233400 |
| H | 3.90511100  | -1.12816300 | -3.60568200 |
| H | 5.08068800  | 0.28078000  | -5.25642500 |
| H | 6.51366000  | 2.17179000  | -4.54854400 |
| H | 6.82540800  | 2.69296800  | -2.14026500 |
| H | 5.96357800  | 1.63588500  | 0.63881000  |
| N | 4.62905000  | 0.04607100  | 0.28717900  |
| N | 4.12779900  | -0.60549100 | -0.81029800 |
| B | 4.43216500  | -0.46228200 | 1.84981000  |
| C | 4.36748400  | -2.10418200 | 1.84042900  |
| C | 5.57885700  | -2.84519900 | 1.24761000  |
| H | 3.45474200  | -2.47595100 | 1.34503000  |
| H | 4.25666500  | -2.42312300 | 2.88919200  |
| H | 5.48225400  | -3.93876500 | 1.32024400  |
| H | 5.71799500  | -2.59797600 | 0.18789900  |
| H | 6.50493200  | -2.57010900 | 1.76757500  |
| C | 5.75504400  | 0.03521700  | 2.71449700  |
| C | 5.80228900  | 1.45917100  | 3.30714600  |
| H | 6.67727700  | -0.13072600 | 2.13499500  |
| H | 5.84530800  | -0.65981300 | 3.56473000  |

|   |            |             |            |
|---|------------|-------------|------------|
| H | 6.73115200 | 1.64087000  | 3.86665600 |
| H | 5.73336300 | 2.24978500  | 2.54729300 |
| H | 4.97139900 | 1.63353300  | 4.00143500 |
| C | 3.04390400 | 0.21734500  | 2.42877200 |
| C | 2.66869700 | -0.20659000 | 3.86110400 |
| H | 2.17441500 | -0.00870300 | 1.78821800 |
| H | 3.13421600 | 1.31582700  | 2.40276900 |
| H | 1.77596000 | 0.31611800  | 4.23715400 |
| H | 2.46210000 | -1.28286700 | 3.91646800 |
| H | 3.48148200 | -0.00518700 | 4.56914900 |

18-ts-iso

Zero-point correction= 1.075911 (Hartree/Particle)

Thermal correction to Energy=1.135180

Thermal correction to Enthalpy=1.136124

Thermal correction to Gibbs Free Energy=0.984026

E(Solv)= -2590.34275158

|    |             |             |             |
|----|-------------|-------------|-------------|
| Pd | 1.01452100  | -0.08280700 | -0.39278100 |
| P  | 2.23454500  | -1.93114300 | 0.52370000  |
| P  | 2.33783400  | 1.91976700  | 0.14560900  |
| C  | 3.95704300  | -1.48212700 | 1.18667300  |
| C  | 4.97047200  | -0.77389300 | 0.30412300  |
| C  | 6.00207200  | -1.53463400 | -0.27276300 |
| C  | 7.03170700  | -0.96547000 | -1.01724000 |
| C  | 7.07498600  | 0.41799400  | -1.16661600 |
| C  | 6.08760100  | 1.19343400  | -0.56550900 |
| C  | 5.01692700  | 0.63487300  | 0.15369000  |
| C  | 4.06166500  | 1.57921200  | 0.85777500  |
| C  | 2.55980000  | -3.39519300 | -0.70117700 |
| C  | 2.96008600  | -2.74564500 | -2.04588700 |
| C  | 3.67670900  | -4.37243300 | -0.27849200 |
| C  | 1.28154300  | -4.23353100 | -0.91823400 |
| C  | 1.41120000  | -2.61793600 | 2.14174000  |
| C  | 1.51559700  | -1.53336200 | 3.23545000  |
| C  | 2.04828100  | -3.91234800 | 2.68397400  |
| C  | -0.09559300 | -2.85262900 | 1.90046200  |
| C  | 2.66779300  | 2.92308100  | -1.47083400 |
| C  | 3.01773700  | 1.87584100  | -2.55409700 |
| C  | 3.80273200  | 3.96380600  | -1.41183600 |
| C  | 1.37365600  | 3.64178800  | -1.89962300 |
| C  | 1.65308200  | 3.10395100  | 1.52345100  |
| C  | 2.31816000  | 4.49282400  | 1.58224800  |
| C  | 0.13538200  | 3.27936100  | 1.32036700  |
| C  | 1.85166100  | 2.42690800  | 2.89788100  |

|   |             |             |             |   |             |             |             |
|---|-------------|-------------|-------------|---|-------------|-------------|-------------|
| H | 3.73858900  | -0.85083500 | 2.05130400  | C | -0.78208100 | 0.55194700  | -3.14280900 |
| H | 4.41443800  | -2.39413600 | 1.58425100  | C | -0.93545200 | 0.10115900  | -1.69925400 |
| H | 6.02134600  | -2.60554600 | -0.10318000 | H | -1.70633000 | 0.37536000  | -3.71059900 |
| H | 7.80513400  | -1.59649900 | -1.44588900 | H | -0.55086500 | 1.61707100  | -3.23555100 |
| H | 7.88248300  | 0.89434600  | -1.71539600 | H | 0.01854000  | -0.00691000 | -3.63786000 |
| H | 6.16804900  | 2.27389600  | -0.62675900 | C | -0.51114600 | -1.21210700 | -1.31899900 |
| H | 4.56495800  | 2.54065400  | 1.00623300  | H | -1.08897100 | -1.73161400 | -0.55827900 |
| H | 3.85322300  | 1.18980700  | 1.85751000  | H | -0.14856300 | -1.85908600 | -2.11571200 |
| H | 2.17251300  | -2.08891800 | -2.42612900 | C | -1.79609200 | 0.80511200  | -0.80961800 |
| H | 3.87738900  | -2.15558800 | -1.96135400 | C | -2.36606900 | 2.15689300  | -1.12894100 |
| H | 3.13696200  | -3.53461700 | -2.78929300 | H | -1.58040300 | 2.92042700  | -1.08160100 |
| H | 4.65462800  | -3.89574800 | -0.22020000 | H | -2.79122200 | 2.18161400  | -2.13626900 |
| H | 3.47722500  | -4.86214400 | 0.67633000  | H | -1.76510400 | 0.52342400  | 0.23038700  |
| H | 3.75295600  | -5.16107700 | -1.03870200 | H | -3.14505300 | 2.42386700  | -0.41343700 |
| H | 1.45014200  | -4.91206200 | -1.76490600 | C | -5.37972500 | -0.77916800 | -2.22761800 |
| H | 1.04506500  | -4.85637200 | -0.05094600 | C | -5.88819900 | -0.24295500 | -1.00655100 |
| H | 0.40604800  | -3.62782500 | -1.15258700 | C | -7.28505800 | -0.09704700 | -0.82955400 |
| H | 1.13655000  | -0.57178800 | 2.87926400  | C | -8.11450700 | -0.48388300 | -1.86488500 |
| H | 0.89498000  | -1.83284000 | 4.08907400  | C | -7.60864600 | -1.02327800 | -3.07781700 |
| H | 2.53440700  | -1.39735100 | 3.61169200  | C | -6.25046200 | -1.17465200 | -3.26739300 |
| H | 3.12989400  | -3.82334600 | 2.83212000  | C | -3.98355700 | -0.74901500 | -2.04921000 |
| H | 1.60587900  | -4.14054900 | 3.66255400  | H | -7.69375700 | 0.31722500  | 0.08192700  |
| H | 1.85720600  | -4.77361700 | 2.03862900  | H | -9.18951700 | -0.36928800 | -1.74987700 |
| H | -0.29930100 | -3.57647000 | 1.10929900  | H | -8.30412500 | -1.31450200 | -3.86060800 |
| H | -0.54459900 | -3.24141200 | 2.82336000  | H | -5.85567400 | -1.58386500 | -4.19428200 |
| H | -0.61070900 | -1.92021900 | 1.65425000  | H | -3.19311900 | -1.04402300 | -2.72486900 |
| H | 3.16593800  | 2.38743600  | -3.51490200 | N | -3.69201300 | -0.26293900 | -0.83994500 |
| H | 3.93618700  | 1.33036400  | -2.32078500 | N | -4.83647500 | 0.05239900  | -0.17465200 |
| H | 2.21243400  | 1.14460300  | -2.67759200 | B | -4.93114200 | 0.44601300  | 1.43966200  |
| H | 3.62072600  | 4.75522200  | -0.68318200 | C | -5.91306700 | -0.66824000 | 2.15355000  |
| H | 4.77151400  | 3.51339300  | -1.19246700 | C | -5.50859900 | -2.14304000 | 1.97971700  |
| H | 3.89004200  | 4.44207500  | -2.39664800 | H | -6.96185200 | -0.56559900 | 1.83697400  |
| H | 1.49529100  | 4.01890600  | -2.92365800 | H | -5.93723500 | -0.44360600 | 3.23113600  |
| H | 0.51443900  | 2.96659100  | -1.89394600 | H | -6.17546900 | -2.83135100 | 2.51930500  |
| H | 1.14361800  | 4.50155900  | -1.26354100 | H | -5.52550500 | -2.44066800 | 0.92318500  |
| H | 1.94608200  | 5.02629900  | 2.46701500  | H | -4.48952100 | -2.32825500 | 2.34554700  |
| H | 3.40825500  | 4.43734700  | 1.67442000  | C | -3.40510600 | 0.36867100  | 2.07563200  |
| H | 2.07567300  | 5.10939600  | 0.71270900  | C | -3.30184800 | 0.23636400  | 3.60818900  |
| H | -0.38682600 | 2.31850200  | 1.33801700  | H | -2.83029900 | 1.26755700  | 1.79111000  |
| H | -0.27002200 | 3.89367000  | 2.13471200  | H | -2.86213400 | -0.48854400 | 1.64378500  |
| H | -0.10669600 | 3.78318000  | 0.38252400  | H | -2.25611300 | 0.23400100  | 3.95352800  |
| H | 1.48117600  | 1.39863000  | 2.90803800  | H | -3.80856300 | 1.05666400  | 4.12833200  |
| H | 2.89630300  | 2.42706900  | 3.22402400  | H | -3.75855800 | -0.69462200 | 3.96305900  |
| H | 1.28020100  | 2.98478000  | 3.65007300  | C | -5.56176100 | 1.97279500  | 1.46358500  |

|                                                    |             |             |             |   |             |             |             |
|----------------------------------------------------|-------------|-------------|-------------|---|-------------|-------------|-------------|
| C                                                  | -5.95728200 | 2.54805500  | 2.83589300  | H | -5.63736300 | -2.15121200 | -3.77293700 |
| H                                                  | -6.45304000 | 2.02583900  | 0.81809700  | H | -4.39833600 | -3.06617500 | -1.86249800 |
| H                                                  | -4.84777100 | 2.67702300  | 0.99829000  | H | -3.71301000 | -2.87756800 | 0.31657600  |
| H                                                  | -6.42977400 | 3.53792200  | 2.75191900  | H | -3.63709500 | -1.36522900 | 1.18694200  |
| H                                                  | -6.66865200 | 1.89386700  | 3.35583300  | H | -0.51498100 | 1.61491000  | -2.19872600 |
| H                                                  | -5.08953400 | 2.66587400  | 3.49668800  | H | -2.20957800 | 1.39231800  | -2.66041000 |
| <hr/>                                              |             |             |             | H | -1.29205700 | 2.75992900  | -3.31210000 |
| 19-ts                                              |             |             |             | H | -3.94208300 | 3.16448600  | -2.00152500 |
| Zero-point correction= 0.866588 (Hartree/Particle) |             |             |             | H | -3.53723100 | 4.46666300  | -0.87306000 |
| Thermal correction to Energy= 0.915087             |             |             |             | H | -2.88633800 | 4.47264000  | -2.51112400 |
| Thermal correction to Enthalpy= 0.916031           |             |             |             | H | -0.53454700 | 4.59287900  | -1.92358300 |
| Thermal correction to Gibbs Free Energy= 0.785300  |             |             |             | H | -1.05853300 | 4.84100600  | -0.25921300 |
| E(Solv)= -2327.64485253                            |             |             |             | H | 0.16412800  | 3.61231800  | -0.63301700 |
| Pd                                                 | -0.31993800 | 0.23566600  | 0.42359000  | H | -2.36044400 | 1.05214600  | 3.06994900  |
| P                                                  | -2.09011000 | 1.86633600  | 0.27414400  | H | -2.84808600 | 2.50120500  | 3.95602800  |
| P                                                  | -1.43595300 | -1.94256800 | 0.41017300  | H | -3.97578600 | 1.75753200  | 2.82732400  |
| C                                                  | -3.85382500 | 1.18066500  | 0.11641600  | H | -4.25370500 | 3.85780900  | 1.33462400  |
| C                                                  | -4.23526200 | 0.21972600  | -0.99235400 | H | -3.44408300 | 4.57195100  | 2.72887400  |
| C                                                  | -5.00090000 | 0.71047900  | -2.06437400 | H | -2.84189200 | 4.90869300  | 1.10752300  |
| C                                                  | -5.48818500 | -0.11061700 | -3.07726400 | H | -0.43796800 | 4.03675300  | 1.70025100  |
| C                                                  | -5.24771400 | -1.48063800 | -3.01225800 | H | -1.12621300 | 3.99636300  | 3.32585700  |
| C                                                  | -4.53028500 | -1.99125400 | -1.93433800 | H | -0.32023700 | 2.56142600  | 2.67159700  |
| C                                                  | -3.99638100 | -1.17424500 | -0.92208100 | H | -0.66877900 | -2.91499700 | -3.15648600 |
| C                                                  | -3.32838100 | -1.85616100 | 0.25748700  | H | -1.99734500 | -1.93517100 | -2.52162600 |
| C                                                  | -1.88006000 | 3.04701700  | -1.24188900 | H | -0.32064600 | -1.43311800 | -2.24788400 |
| C                                                  | -1.44909800 | 2.14099600  | -2.41842900 | H | -1.66246600 | -5.09120700 | -0.31567100 |
| C                                                  | -3.14355300 | 3.82418600  | -1.66306900 | H | -2.85251000 | -4.19323400 | -1.26773100 |
| C                                                  | -0.75982600 | 4.07555800  | -0.98175000 | H | -1.47568500 | -4.95037300 | -2.06188200 |
| C                                                  | -2.33433000 | 2.91418800  | 1.89462900  | H | 0.86714600  | -4.06421800 | -1.80898900 |
| C                                                  | -2.91848300 | 1.98952600  | 2.98759900  | H | 1.22245500  | -2.78493800 | -0.64776600 |
| C                                                  | -3.27257700 | 4.12740200  | 1.73935800  | H | 0.66680800  | -4.37154500 | -0.08683100 |
| C                                                  | -0.96769100 | 3.40374500  | 2.41511000  | H | -2.16031800 | -4.38410500 | 3.37019800  |
| C                                                  | -0.91552500 | -3.14538900 | -1.01411900 | H | -3.37006100 | -3.62914400 | 2.33598000  |
| C                                                  | -0.98999900 | -2.29749100 | -2.30700000 | H | -2.20679100 | -4.77829600 | 1.65215900  |
| C                                                  | -1.78777400 | -4.40711500 | -1.16007400 | H | 0.86720000  | -2.62510200 | 2.09523900  |
| C                                                  | 0.54602000  | -3.61190100 | -0.86164700 | H | 0.22283300  | -3.53744000 | 3.46698800  |
| C                                                  | -1.32740500 | -2.81280200 | 2.14023000  | H | 0.28645200  | -4.28509700 | 1.87347900  |
| C                                                  | -2.32848300 | -3.96299300 | 2.36999800  | H | -0.88315000 | -0.89351500 | 3.10865700  |
| C                                                  | 0.09828400  | -3.34331400 | 2.39369700  | H | -2.61323400 | -1.28926000 | 3.09419600  |
| C                                                  | -1.60667700 | -1.71122400 | 3.18700400  | H | -1.52886300 | -2.14228700 | 4.19395900  |
| H                                                  | -4.01660600 | 0.68535300  | 1.07694800  | C | 2.24072600  | 0.16772800  | 2.37345800  |
| H                                                  | -4.54273400 | 2.03159300  | 0.09261700  | C | 1.90288400  | 0.36993500  | 0.90922900  |
| H                                                  | -5.25679100 | 1.76467900  | -2.08457900 | H | 2.11959700  | -0.87446200 | 2.68577700  |
| H                                                  | -6.07321400 | 0.31446400  | -3.88791000 | H | 3.29671400  | 0.42623300  | 2.52013600  |



|                                                    |                   |                    |                    |   |             |             |             |
|----------------------------------------------------|-------------------|--------------------|--------------------|---|-------------|-------------|-------------|
| H                                                  | 1.62632200        | 0.79728700         | 3.02577300         | C | -2.55002500 | 4.28348900  | 0.66271700  |
| C                                                  | 1.35918500        | 1.60156100         | 0.46807100         | C | -0.28569600 | 3.88543300  | -0.34305200 |
| H                                                  | 1.29901600        | 2.42236500         | 1.17489700         | C | -0.81670800 | 2.14246200  | 2.88816900  |
| H                                                  | 1.51311700        | 1.91038300         | -0.56255200        | C | -0.37591300 | 0.83779400  | 3.58637500  |
| C                                                  | 2.33860200        | -0.61306400        | -0.01954500        | C | -1.92650100 | 2.78926400  | 3.74531700  |
| C                                                  | 2.67694200        | -0.44194600        | -1.40349500        | C | 0.39878400  | 3.08989900  | 2.85335100  |
| H                                                  | 2.23908700        | 0.41705900         | -1.91580500        | C | -1.20217700 | -2.71710500 | -1.89923600 |
| H                                                  | 2.61231600        | -1.56768000        | 0.42191200         | C | -1.95697500 | -1.65561500 | -2.73097500 |
| C                                                  | 7.31171000        | 0.01512700         | 0.25127800         | C | -1.87805000 | -4.08456400 | -2.10431200 |
| C                                                  | 6.60176000        | 0.20349800         | -0.97761200        | C | 0.24471500  | -2.77051300 | -2.44052600 |
| C                                                  | 7.27826700        | 0.59313600         | -2.15341900        | C | -0.55735400 | -3.48257400 | 1.10935200  |
| C                                                  | 8.64649500        | 0.78729800         | -2.08075700        | C | -1.55617000 | -4.63950500 | 1.32496300  |
| C                                                  | 9.35882700        | 0.60327900         | -0.86563800        | C | 0.78227600  | -4.06671500 | 0.62065000  |
| C                                                  | 8.70706900        | 0.22108300         | 0.29453000         | C | -0.30479800 | -2.80568600 | 2.47432700  |
| C                                                  | 6.28910800        | -0.36532100        | 1.15788600         | H | -2.85773100 | 0.20759400  | 2.25448500  |
| H                                                  | 6.73577600        | 0.73482500         | -3.08508500        | H | -3.62553300 | 1.75968000  | 2.00603400  |
| H                                                  | 9.19373200        | 1.08753500         | -2.97176900        | H | -5.13051200 | 2.20330300  | 0.38155600  |
| H                                                  | 10.43391100       | 0.76710100         | -0.85342200        | H | -6.81672000 | 1.40455000  | -1.22287100 |
| H                                                  | 9.26244100        | 0.08300800         | 1.22028500         | H | -6.70062300 | -0.95736600 | -2.05395200 |
| H                                                  | 6.36179800        | -0.61513600        | 2.21000600         | H | -4.91134400 | -2.43742600 | -1.23532000 |
| N                                                  | 5.10944200        | -0.39705600        | 0.52854600         | H | -3.41032100 | -2.98323400 | 0.32607500  |
| N                                                  | 5.28298400        | -0.05152600        | -0.75882800        | H | -2.86438200 | -1.89515300 | 1.57997000  |
| H                                                  | 3.89414000        | -0.21147700        | -1.32203300        | H | -1.66542200 | 1.97297400  | -1.78542700 |
| <u>H</u>                                           | <u>2.61408500</u> | <u>-1.35196600</u> | <u>-2.00567500</u> | H | -3.28250200 | 2.38752000  | -1.20507700 |
| 20-ts                                              |                   |                    |                    | H | -2.29434200 | 3.61200800  | -2.01238900 |
| Zero-point correction= 0.953266 (Hartree/Particle) |                   |                    |                    | H | -3.50524800 | 3.87013500  | 1.00307300  |
| Thermal correction to Energy= 1.006206             |                   |                    |                    | H | -2.06866400 | 4.77726500  | 1.51203200  |
| Thermal correction to Enthalpy= 1.007150           |                   |                    |                    | H | -2.77932700 | 5.06331400  | -0.07549700 |
| Thermal correction to Gibbs Free Energy=0.869162   |                   |                    |                    | H | -0.47658400 | 4.71438300  | -1.03725800 |
| E(Solv)= -2394.91262419                            |                   |                    |                    | H | 0.23546400  | 4.29758500  | 0.52204000  |
| Pd                                                 | 0.03935100        | 0.07104200         | 0.11283100         | H | 0.38591200  | 3.18385800  | -0.84555000 |
| P                                                  | -1.34704000       | 1.65018400         | 1.08883800         | H | 0.47281400  | 0.37749200  | 3.07686100  |
| P                                                  | -1.15653700       | -2.08080200        | -0.08396400        | H | -0.07096100 | 1.07038200  | 4.61544000  |
| C                                                  | -3.07477800       | 0.96590800         | 1.49361600         | H | -1.18333500 | 0.10008100  | 3.64767000  |
| C                                                  | -3.99275900       | 0.38014000         | 0.43801100         | H | -2.74678300 | 2.09704700  | 3.95831900  |
| C                                                  | -5.05400200       | 1.19045100         | -0.00655900        | H | -1.49501900 | 3.07724400  | 4.71291400  |
| C                                                  | -6.01612700       | 0.74200100         | -0.90602700        | H | -2.34776200 | 3.69204500  | 3.29707500  |
| C                                                  | -5.95191800       | -0.57172100        | -1.36763900        | H | 0.12103800  | 4.10701100  | 2.56184300  |
| C                                                  | -4.93152700       | -1.39970600        | -0.91054500        | H | 0.83062900  | 3.14950700  | 3.86077900  |
| C                                                  | -3.93418700       | -0.95684500        | -0.02210100        | H | 1.18338400  | 2.73036200  | 2.18051800  |
| C                                                  | -2.96158000       | -1.99971400        | 0.49280400         | H | -1.83616100 | -1.88861600 | -3.79716600 |
| C                                                  | -1.63632800       | 3.22661900         | 0.01290200         | H | -3.02571400 | -1.62879700 | -2.51429300 |
| C                                                  | -2.26475200       | 2.76054200         | -1.31970900        | H | -1.55529300 | -0.65160100 | -2.56121400 |
|                                                    |                   |                    |                    | H | -1.29906500 | -4.90162100 | -1.66395400 |

|   |             |             |             |
|---|-------------|-------------|-------------|
| H | -2.89184800 | -4.12009300 | -1.68960300 |
| H | -1.96065900 | -4.29060000 | -3.18004100 |
| H | 0.21086900  | -2.98007600 | -3.51800200 |
| H | 0.76603100  | -1.81816600 | -2.30232700 |
| H | 0.84657500  | -3.55266800 | -1.97486000 |
| H | -1.08823800 | -5.38998000 | 1.97582700  |
| H | -2.47317400 | -4.31346800 | 1.82544500  |
| H | -1.83468600 | -5.14349300 | 0.39637400  |
| H | 1.50969500  | -3.28796300 | 0.37149200  |
| H | 1.21813700  | -4.67876200 | 1.42109800  |
| H | 0.65595200  | -4.71779100 | -0.24937900 |
| H | 0.46373800  | -2.03282900 | 2.40612700  |
| H | -1.21020200 | -2.35198900 | 2.89332600  |
| H | 0.03955800  | -3.56180100 | 3.19226500  |
| C | 3.39641600  | 1.39032500  | -2.75957700 |
| C | 2.08405500  | 1.03615100  | -2.34829200 |
| C | 0.98108200  | 1.24202200  | -3.19986300 |
| C | 1.22389000  | 1.79281600  | -4.44675200 |
| C | 2.53332300  | 2.14322400  | -4.86572300 |
| C | 3.62172600  | 1.94638900  | -4.03584200 |
| C | 4.20069000  | 1.04700800  | -1.65228500 |
| H | -0.01996900 | 0.96649000  | -2.88698300 |
| H | 0.39173300  | 1.95792100  | -5.12635600 |
| H | 2.67630700  | 2.56819100  | -5.85527400 |
| H | 4.62573600  | 2.20982800  | -4.35737300 |
| H | 5.26964200  | 1.11871800  | -1.52680400 |
| N | 3.44623300  | 0.53637600  | -0.67901000 |
| N | 2.13161400  | 0.49901000  | -1.08511900 |
| H | 1.18926100  | 1.16451100  | -0.14857400 |
| B | 4.10180700  | -0.20924100 | 0.67293000  |
| C | 2.96907700  | -0.14607700 | 1.85612100  |
| C | 3.14163600  | -1.12118500 | 3.03545700  |
| H | 1.97095100  | -0.35409200 | 1.41820600  |
| H | 2.89362700  | 0.87844000  | 2.25902300  |
| H | 2.35747700  | -0.99707000 | 3.79732700  |
| H | 3.10059800  | -2.16345600 | 2.69758700  |
| H | 4.10163700  | -0.98731700 | 3.54392200  |
| C | 4.43024500  | -1.73099200 | 0.11571100  |
| C | 5.47537900  | -2.55617600 | 0.88977900  |
| H | 4.78748000  | -1.65867500 | -0.92476300 |
| H | 3.49877100  | -2.31950400 | 0.05167500  |
| H | 5.62804800  | -3.54772800 | 0.43952700  |
| H | 6.45077000  | -2.05408600 | 0.89565700  |
| H | 5.19196600  | -2.71771800 | 1.93597300  |

|   |            |             |            |
|---|------------|-------------|------------|
| C | 5.45004800 | 0.68925400  | 0.99979900 |
| C | 6.03974400 | 0.58451700  | 2.41857100 |
| H | 5.22787600 | 1.75593400  | 0.82644300 |
| H | 6.26158300 | 0.44637400  | 0.29157400 |
| H | 6.94277600 | 1.20161200  | 2.52896100 |
| H | 5.32414800 | 0.92687700  | 3.17604600 |
| H | 6.31890400 | -0.44335200 | 2.67677400 |

21

Zero-point correction=0.309166 (Hartree/Particle)

Thermal correction to Energy=0.325774

Thermal correction to Enthalpy=0.326718

Thermal correction to Gibbs Free Energy=0.265204

E(Solv)= -642.184345728

|   |             |             |             |
|---|-------------|-------------|-------------|
| C | -1.91581900 | -0.80589700 | -0.37789600 |
| C | -1.85783200 | 0.48073800  | 0.26010100  |
| C | -3.05174700 | 1.14331600  | 0.63470200  |
| C | -4.25908000 | 0.52469200  | 0.37197000  |
| C | -4.31815000 | -0.75079200 | -0.25981200 |
| C | -3.16481500 | -1.41640500 | -0.63350000 |
| C | -0.56204400 | -1.11925400 | -0.58082200 |
| H | -3.00413900 | 2.11702700  | 1.11677600  |
| H | -5.18939300 | 1.01697300  | 0.65106900  |
| H | -5.29017700 | -1.20322600 | -0.44854100 |
| H | -3.22123600 | -2.39117500 | -1.11615600 |
| H | -0.09932300 | -1.98760600 | -1.02424800 |
| N | 0.18465300  | -0.10184700 | -0.10100200 |
| N | -0.57957300 | 0.89003100  | 0.41947200  |
| B | 1.79824500  | 0.03647800  | -0.15565200 |
| C | 2.16121900  | 1.00468000  | -1.44720900 |
| C | 1.75647400  | 2.48580500  | -1.35722200 |
| H | 1.70469000  | 0.57339100  | -2.35585500 |
| H | 3.24973600  | 0.95790300  | -1.62652200 |
| H | 0.68646800  | 2.58769500  | -1.14290500 |
| H | 2.28989800  | 2.99388700  | -0.54253500 |
| H | 1.97270800  | 3.04465100  | -2.28304800 |
| C | 2.28988600  | 0.68757100  | 1.27154200  |
| C | 2.01136200  | -0.15098500 | 2.53057000  |
| H | 1.81514400  | 1.66891000  | 1.40941300  |
| H | 3.37390900  | 0.88959800  | 1.21484400  |
| H | 2.36157500  | 0.33399300  | 3.45660000  |
| H | 0.93420200  | -0.32705600 | 2.64566700  |
| H | 2.49588600  | -1.13647500 | 2.48162800  |
| C | 2.40410900  | -1.48294400 | -0.41178200 |

|   |            |             |             |
|---|------------|-------------|-------------|
| C | 3.93630000 | -1.59066300 | -0.31817200 |
| H | 2.10847300 | -1.85453900 | -1.40955700 |
| H | 1.97195800 | -2.20389000 | 0.30311700  |
| H | 4.30595900 | -2.60849900 | -0.52285200 |
| H | 4.43078000 | -0.91942400 | -1.03300600 |
| H | 4.29691600 | -1.31099700 | 0.68025800  |

21-iso

Zero-point correction= 0.309025 (Hartree/Particle)

Thermal correction to Energy= 0.325659

Thermal correction to Enthalpy= 0.326604

Thermal correction to Gibbs Free Energy= 0.264945

E(solv)=-642.18367227

|   |             |             |             |
|---|-------------|-------------|-------------|
| C | -2.15433300 | 1.10063500  | -0.07905000 |
| C | -1.18593300 | 0.04633700  | -0.05297500 |
| C | -1.61834700 | -1.29939600 | -0.08856500 |
| C | -2.97843500 | -1.55630800 | -0.15859400 |
| C | -3.93648000 | -0.51227500 | -0.19199700 |
| C | -3.53100700 | 0.81141300  | -0.15157100 |
| C | -1.35999800 | 2.27152300  | -0.01411800 |
| H | -0.90553000 | -2.11323400 | -0.05672500 |
| H | -3.32074500 | -2.58942500 | -0.18606400 |
| H | -4.99539200 | -0.75831600 | -0.24694900 |
| H | -4.26318700 | 1.61753900  | -0.17262800 |
| H | -1.67406600 | 3.30973300  | -0.00836700 |
| N | -0.06949500 | 1.96682300  | 0.04123900  |
| N | 0.06267700  | 0.61215400  | 0.01125300  |
| B | 1.55715100  | -0.02250500 | 0.15774000  |
| C | 1.86996800  | -0.18669400 | 1.77443300  |
| C | 0.99676900  | -1.16532900 | 2.57848700  |
| H | 1.79439500  | 0.80769000  | 2.24633000  |
| H | 2.92387700  | -0.48917600 | 1.90503200  |
| H | -0.06622900 | -0.89886200 | 2.51315500  |
| H | 1.08987000  | -2.19372100 | 2.20188400  |
| H | 1.25677100  | -1.19366600 | 3.64975800  |
| C | 1.66957900  | -1.46929800 | -0.63238000 |
| C | 1.35107600  | -1.46642300 | -2.13801200 |
| H | 1.07834100  | -2.26685300 | -0.15412700 |
| H | 2.71135500  | -1.80947200 | -0.50600300 |
| H | 1.50610800  | -2.44867300 | -2.61431800 |
| H | 0.30939400  | -1.17637500 | -2.32695600 |
| H | 1.98112400  | -0.74406400 | -2.67342400 |
| C | 2.58871200  | 1.08886600  | -0.50227300 |
| C | 4.06598500  | 0.66524900  | -0.58697400 |

|   |            |             |             |
|---|------------|-------------|-------------|
| H | 2.53087000 | 2.02432100  | 0.07210100  |
| H | 2.25337200 | 1.36648900  | -1.51553500 |
| H | 4.71322900 | 1.46236300  | -0.98844000 |
| H | 4.46761700 | 0.39604000  | 0.40004200  |
| H | 4.20546500 | -0.21246200 | -1.23337100 |

22

Zero-point correction= 0.602181 (Hartree/Particle)

Thermal correction to Energy= 0.638798

Thermal correction to Enthalpy= 0.639743

Thermal correction to Gibbs Free Energy= 0.528656

E(Solv) = -2029.64698778

|    |             |             |             |
|----|-------------|-------------|-------------|
| C  | -2.27520600 | -2.16919200 | 2.16141600  |
| O  | -1.02040000 | -2.84841000 | 1.90432400  |
| C  | -0.30109000 | -2.05245200 | 1.09233700  |
| C  | -2.35656000 | -1.15274100 | 1.00549700  |
| H  | -3.06839100 | -2.91598200 | 2.16141400  |
| H  | -2.19778600 | -1.69474000 | 3.14543800  |
| H  | -2.73573500 | -0.19018700 | 1.35745700  |
| N  | -0.92474000 | -1.01171900 | 0.62743400  |
| C  | 1.05113600  | -2.56830900 | 0.78537800  |
| C  | 1.25187900  | -3.93797000 | 1.04106500  |
| C  | 2.10298800  | -1.81195100 | 0.21014500  |
| C  | 2.44889300  | -4.56683300 | 0.71071300  |
| H  | 0.44990500  | -4.51229100 | 1.48723600  |
| C  | 3.29848600  | -2.46754900 | -0.11698900 |
| C  | 3.47445100  | -3.83147600 | 0.12221000  |
| H  | 2.57230600  | -5.62689100 | 0.90921400  |
| H  | 4.10912200  | -1.90282300 | -0.56414600 |
| H  | 4.41218200  | -4.30885500 | -0.14627800 |
| P  | 1.99325400  | 0.01350300  | -0.02603800 |
| Pd | -0.19157600 | 0.71193100  | -0.44248400 |
| C  | -3.21915300 | -1.64714000 | -0.15342500 |
| C  | -2.68120100 | -2.17654800 | -1.33167400 |
| C  | -4.61326100 | -1.62173900 | 0.00286700  |
| C  | -3.52119600 | -2.66874700 | -2.33583200 |
| H  | -1.60550200 | -2.20464000 | -1.47357400 |
| C  | -5.45022400 | -2.12166900 | -0.99331900 |
| H  | -5.04778600 | -1.20152000 | 0.90718200  |
| C  | -4.90541700 | -2.64562300 | -2.16925800 |
| H  | -3.08845500 | -3.07728500 | -3.24485200 |
| H  | -6.52735900 | -2.09897100 | -0.85396600 |
| H  | -5.55662200 | -3.03377300 | -2.94699500 |
| C  | 3.27149000  | 0.37314300  | -1.29235900 |

|   |             |             |             |
|---|-------------|-------------|-------------|
| C | 4.47156800  | 1.03215000  | -0.98925900 |
| C | 3.00854200  | -0.00163800 | -2.62247400 |
| C | 5.39546900  | 1.30697700  | -2.00184100 |
| H | 4.68896100  | 1.33171700  | 0.03085100  |
| C | 3.93704600  | 0.26651800  | -3.62628200 |
| H | 2.07717800  | -0.50481500 | -2.87256500 |
| C | 5.13211500  | 0.92427300  | -3.31729300 |
| H | 6.32124300  | 1.81979100  | -1.75767300 |
| H | 3.72724800  | -0.03211300 | -4.64932100 |
| H | 5.85230500  | 1.13912300  | -4.10126500 |
| C | 2.61235200  | 0.70527700  | 1.56230100  |
| C | 3.57233500  | 0.04310500  | 2.34561900  |
| C | 2.11417200  | 1.94506400  | 1.99642100  |
| C | 4.02771500  | 0.61696300  | 3.53328900  |
| H | 3.96295200  | -0.92114700 | 2.03638900  |
| C | 2.57490000  | 2.51726800  | 3.18260800  |
| H | 1.36044500  | 2.45751700  | 1.40570300  |
| C | 3.53192700  | 1.85362100  | 3.95265300  |
| H | 4.76854300  | 0.09514700  | 4.13207100  |
| H | 2.18261800  | 3.47678600  | 3.50715700  |
| H | 3.88737000  | 2.29590700  | 4.87872000  |
| C | -2.14982500 | 1.86263800  | -1.05837600 |
| C | -1.02184100 | 2.69383800  | -1.01406400 |
| H | -2.31589000 | 1.27404800  | -1.96087900 |
| H | -0.97193200 | 3.47416000  | -0.25545000 |
| C | 0.14946900  | 2.40853600  | -1.76186100 |
| C | 1.33444300  | 3.34198200  | -1.73761400 |
| H | 0.01677700  | 1.86468800  | -2.70094200 |
| H | 1.19696200  | 4.12737800  | -2.49355400 |
| H | 1.44958000  | 3.83314500  | -0.76562500 |
| C | -3.32911800 | 2.05902500  | -0.19864500 |
| C | -4.60185200 | 1.72789000  | -0.69681700 |
| C | -3.23948400 | 2.61498300  | 1.09358600  |
| C | -5.74960200 | 1.97282200  | 0.05603300  |
| H | -4.68934000 | 1.28949600  | -1.68716400 |
| C | -4.38605200 | 2.84978000  | 1.84845400  |
| H | -2.26626700 | 2.85692500  | 1.51331400  |
| C | -5.64649700 | 2.53475700  | 1.33009000  |
| H | -6.72452200 | 1.72554000  | -0.35393600 |
| H | -4.29831900 | 3.28029600  | 2.84197300  |
| H | -6.54003600 | 2.72498500  | 1.91743100  |
| H | 2.26553800  | 2.82312000  | -1.97697200 |

Zero-point correction= 0.786891 (Hartree/Particle)  
 Thermal correction to Energy= 0.832513  
 Thermal correction to Enthalpy= 0.833457  
 Thermal correction to Gibbs Free Energy= 0.699443  
 E(Solv) = -2434.12873165

|    |             |             |             |
|----|-------------|-------------|-------------|
| C  | -2.76224700 | 4.00705500  | 0.40287600  |
| O  | -3.77589900 | 3.11060500  | -0.11007300 |
| C  | -3.19998300 | 1.89801800  | -0.26492400 |
| C  | -1.44264500 | 3.24235400  | 0.14271900  |
| H  | -2.84497600 | 4.95231300  | -0.13393500 |
| H  | -2.96289500 | 4.16049400  | 1.46805500  |
| H  | -0.80283000 | 3.26401000  | 1.02827500  |
| N  | -1.92022800 | 1.85396100  | -0.07135700 |
| C  | -4.13771700 | 0.84357000  | -0.72063000 |
| C  | -5.36178000 | 1.31228400  | -1.23785100 |
| C  | -3.88195800 | -0.55297800 | -0.71638200 |
| C  | -6.31043200 | 0.44171000  | -1.76450000 |
| H  | -5.55807100 | 2.37669500  | -1.23462200 |
| C  | -4.85576800 | -1.40861200 | -1.25392700 |
| C  | -6.05562000 | -0.92711400 | -1.77754900 |
| H  | -7.23989100 | 0.83592000  | -2.16376100 |
| H  | -4.67292900 | -2.47772600 | -1.26130300 |
| H  | -6.78382500 | -1.62154000 | -2.18638700 |
| P  | -2.35732300 | -1.30382500 | 0.01934100  |
| Pd | -0.53701100 | 0.18908200  | 0.10580600  |
| C  | -0.65912900 | 3.78211900  | -1.04764800 |
| C  | -0.82108200 | 3.28019500  | -2.34446300 |
| C  | 0.20398100  | 4.86888200  | -0.84503200 |
| C  | -0.13170000 | 3.85288700  | -3.41678000 |
| H  | -1.48037500 | 2.43557900  | -2.51922500 |
| C  | 0.88768700  | 5.44502500  | -1.91615500 |
| H  | 0.34343300  | 5.26426700  | 0.15844700  |
| C  | 0.72271700  | 4.93627300  | -3.20693800 |
| H  | -0.27008100 | 3.45469200  | -4.41840700 |
| H  | 1.54874100  | 6.28972500  | -1.74284300 |
| H  | 1.25339700  | 5.38416100  | -4.04228900 |
| C  | -2.19329000 | -2.88414600 | -0.91687600 |
| C  | -2.43277700 | -4.14239300 | -0.34546800 |
| C  | -1.76892500 | -2.81407700 | -2.25674400 |
| C  | -2.25713500 | -5.30559100 | -1.10114700 |
| H  | -2.76156300 | -4.21838900 | 0.68606400  |
| C  | -1.60730600 | -3.97543100 | -3.01089200 |
| H  | -1.57158400 | -1.84567400 | -2.71161700 |
| C  | -1.84910500 | -5.22560700 | -2.43288500 |

|   |             |             |             |
|---|-------------|-------------|-------------|
| H | -2.44744200 | -6.27374900 | -0.64648200 |
| H | -1.29069200 | -3.90601000 | -4.04798800 |
| H | -1.71916700 | -6.13092900 | -3.01883900 |
| C | -2.88478300 | -1.80597500 | 1.71494400  |
| C | -4.22605200 | -1.89534500 | 2.11776000  |
| C | -1.87530400 | -2.10911200 | 2.64592200  |
| C | -4.54778500 | -2.28255600 | 3.42066300  |
| H | -5.02430800 | -1.66163700 | 1.42125000  |
| C | -2.19990100 | -2.50802200 | 3.94223800  |
| H | -0.83256600 | -2.02861800 | 2.35023700  |
| C | -3.53836100 | -2.59204500 | 4.33337400  |
| H | -5.59034200 | -2.34275900 | 3.71993200  |
| H | -1.40912200 | -2.74404100 | 4.64896500  |
| H | -3.79250900 | -2.89349300 | 5.34548300  |
| C | 1.40694700  | 1.01928600  | 0.47674900  |
| C | 1.48970200  | -0.41768100 | 0.54105300  |
| H | 1.73523300  | 1.48917000  | -0.45293800 |
| H | 1.58318800  | -0.90306900 | 1.51188900  |
| C | 1.79201900  | -1.21008900 | -0.60085500 |
| C | 1.65292200  | -2.70708400 | -0.58843600 |
| H | 1.68815000  | -0.73156800 | -1.57183500 |
| H | 2.30748800  | -3.18023800 | -1.32590800 |
| H | 1.86949100  | -3.12298900 | 0.40066100  |
| C | 1.56394400  | 1.87825600  | 1.67138600  |
| C | 2.17712400  | 3.13944100  | 1.54691700  |
| C | 1.12582100  | 1.48288400  | 2.95218200  |
| C | 2.35319300  | 3.96919100  | 2.65478000  |
| H | 2.52154200  | 3.46706000  | 0.56924100  |
| C | 1.30332000  | 2.31142400  | 4.05828700  |
| H | 0.62543600  | 0.52636100  | 3.07813900  |
| C | 1.91847500  | 3.55895400  | 3.91663400  |
| H | 2.83773800  | 4.93424700  | 2.53261800  |
| H | 0.95647900  | 1.98444800  | 5.03484400  |
| H | 2.05645800  | 4.20266100  | 4.78045700  |
| H | 0.62522700  | -2.97980300 | -0.85011500 |
| C | 4.63952900  | -1.66673600 | 0.28258000  |
| C | 6.14596700  | -1.50721900 | 0.15113600  |
| C | 6.73015300  | -1.17562000 | -1.08174600 |
| C | 5.86947900  | -0.89135300 | -2.30052900 |
| C | 4.43317800  | -1.40207200 | -2.13207000 |
| H | 6.50101000  | -1.98466900 | 2.22295900  |
| H | 4.28327800  | -1.24283800 | 1.22749000  |
| C | 6.95939400  | -1.73072900 | 1.26936300  |
| C | 8.12558500  | -1.07626500 | -1.16669300 |

|          |                   |                    |                    |
|----------|-------------------|--------------------|--------------------|
| H        | 5.84442700        | 0.19176900         | -2.49282500        |
| H        | 4.40291600        | -2.49538200        | -2.19901300        |
| C        | 8.93065900        | -1.30251800        | -0.05310400        |
| C        | 8.34494800        | -1.63127100        | 1.17260100         |
| H        | 8.58199300        | -0.81913100        | -2.11992800        |
| H        | 10.01039600       | -1.22345000        | -0.13947600        |
| H        | 8.96467600        | -1.80536200        | 2.04729100         |
| N        | 3.88301600        | -1.03182500        | -0.81278200        |
| H        | 3.92957700        | -0.01769200        | -0.70030800        |
| H        | 4.37010300        | -2.73124200        | 0.28482800         |
| H        | 3.77782900        | -0.99969600        | -2.91228900        |
| <u>H</u> | <u>6.31121500</u> | <u>-1.34510800</u> | <u>-3.19606200</u> |

24

Zero-point correction= 0.789987 (Hartree/Particle)

Thermal correction to Energy= 0.835338

Thermal correction to Enthalpy= 0.836282

Thermal correction to Gibbs Free Energy= 0.703446

E(Solv)= -2434.14645737

|    |             |             |             |
|----|-------------|-------------|-------------|
| C  | -2.48361900 | 4.11957100  | 0.64880700  |
| O  | -3.57070300 | 3.30690000  | 0.14772300  |
| C  | -3.06649200 | 2.07664700  | -0.10668400 |
| C  | -1.22066700 | 3.29360300  | 0.29636400  |
| H  | -2.53355900 | 5.09132600  | 0.15653800  |
| H  | -2.62654900 | 4.23830100  | 1.72758700  |
| H  | -0.55290800 | 3.21995700  | 1.15873200  |
| N  | -1.78565700 | 1.95287200  | 0.01332900  |
| C  | -4.07557800 | 1.09420800  | -0.57030200 |
| C  | -5.28627900 | 1.64890000  | -1.02942600 |
| C  | -3.89554700 | -0.31335600 | -0.62423000 |
| C  | -6.29735400 | 0.85273500  | -1.55776600 |
| H  | -5.42179200 | 2.72179300  | -0.97889600 |
| C  | -4.93175200 | -1.09190000 | -1.16298600 |
| C  | -6.11819200 | -0.52611000 | -1.63030700 |
| H  | -7.21538600 | 1.31171000  | -1.91192000 |
| H  | -4.80946600 | -2.16826600 | -1.21716500 |
| H  | -6.89521100 | -1.16393000 | -2.04179700 |
| P  | -2.38758900 | -1.17085600 | 0.03995100  |
| Pd | -0.48166700 | 0.19490300  | 0.06594700  |
| C  | -0.44090500 | 3.86123600  | -0.88282700 |
| C  | -0.70343500 | 3.48290300  | -2.20499300 |
| C  | 0.52334900  | 4.84989200  | -0.64042400 |
| C  | -0.01514800 | 4.08188900  | -3.26318800 |
| H  | -1.44077700 | 2.71280500  | -2.40973900 |

|   |             |             |             |          |                   |                    |                    |
|---|-------------|-------------|-------------|----------|-------------------|--------------------|--------------------|
| C | 1.20685500  | 5.45304800  | -1.69706100 | C        | 2.55750400        | 3.06557500         | 3.82852000         |
| H | 0.74298100  | 5.14598800  | 0.38269300  | H        | 3.42318200        | 4.46523400         | 2.43466500         |
| C | 0.93975800  | 5.06903400  | -3.01349200 | H        | 1.60749500        | 1.48309000         | 4.94545600         |
| H | -0.23268700 | 3.78074100  | -4.28454800 | H        | 2.81336100        | 3.64904100         | 4.70812500         |
| H | 1.94696500  | 6.22185800  | -1.49222900 | H        | 0.47182700        | -2.96556100        | -1.12768200        |
| H | 1.46907400  | 5.53907600  | -3.83763600 | C        | 4.25909400        | -1.95176500        | 0.15432400         |
| C | -2.36677200 | -2.73438100 | -0.94424500 | C        | 5.74912100        | -1.68705300        | 0.08446900         |
| C | -2.61571300 | -3.99670000 | -0.38688800 | C        | 6.37031100        | -1.29465100        | -1.11083700        |
| C | -2.03047000 | -2.64919300 | -2.30818300 | C        | 5.55270700        | -1.03334900        | -2.36272500        |
| C | -2.53406300 | -5.14774500 | -1.17711600 | C        | 4.14661500        | -1.62367700        | -2.28273700        |
| H | -2.87985000 | -4.08567300 | 0.66206000  | H        | 6.02895800        | -2.17614600        | 2.16659600         |
| C | -1.96383500 | -3.79697400 | -3.09665300 | H        | 3.83251100        | -1.58783900        | 1.09152800         |
| H | -1.82855500 | -1.67754600 | -2.75413700 | C        | 6.51643700        | -1.87852200        | 1.24110100         |
| C | -2.21287000 | -5.05171400 | -2.53114500 | C        | 7.75808200        | -1.10280800        | -1.12441200        |
| H | -2.73136600 | -6.11875100 | -0.73124400 | H        | 5.48165800        | 0.04885400         | -2.54703700        |
| H | -1.71740200 | -3.71364000 | -4.15184000 | H        | 4.16260500        | -2.71438700        | -2.34474300        |
| H | -2.15805600 | -5.94682400 | -3.14420600 | C        | 8.51873500        | -1.30184700        | 0.02474800         |
| C | -2.90656500 | -1.69702800 | 1.73400600  | C        | 7.89554900        | -1.69130900        | 1.21373000         |
| C | -4.24554500 | -1.83312400 | 2.13292000  | H        | 8.24317500        | -0.79527700        | -2.04770400        |
| C | -1.89164200 | -1.97718100 | 2.66531200  | H        | 9.59382100        | -1.15253700        | -0.00501200        |
| C | -4.55895200 | -2.24414200 | 3.43014600  | H        | 8.48090600        | -1.84255900        | 2.11547200         |
| H | -5.04913400 | -1.61467500 | 1.43740300  | N        | 3.51821600        | -1.27120100        | -0.96172400        |
| C | -2.20695900 | -2.39847800 | 3.95739100  | H        | 3.63862000        | -0.26126100        | -0.81513200        |
| H | -0.85261500 | -1.85471300 | 2.37201100  | H        | 4.03479400        | -3.01948100        | 0.06972400         |
| C | -3.54256900 | -2.53029200 | 4.34334000  | H        | 3.49874000        | -1.23822200        | -3.07402900        |
| H | -5.59998300 | -2.33966600 | 3.72585700  | <u>H</u> | <u>6.05122400</u> | <u>-1.45389100</u> | <u>-3.24363000</u> |
| H | -1.41101300 | -2.61312500 | 4.66531600  |          |                   |                    |                    |
| H | -3.79009300 | -2.84895900 | 5.35192100  |          |                   |                    |                    |
| C | 1.57311700  | 0.76326900  | 0.31445200  |          |                   |                    |                    |
| C | 1.42076200  | -0.67097800 | 0.27775600  |          |                   |                    |                    |
| H | 1.90371700  | 1.25430600  | -0.60663700 |          |                   |                    |                    |
| H | 1.52403200  | -1.21678500 | 1.21778900  |          |                   |                    |                    |
| C | 1.93600000  | -1.43302200 | -0.91177100 |          |                   |                    |                    |
| C | 1.54955600  | -2.90540000 | -0.96178700 |          |                   |                    |                    |
| H | 1.64668100  | -0.93196600 | -1.84063400 |          |                   |                    |                    |
| H | 2.04010600  | -3.44763200 | -1.77712300 |          |                   |                    |                    |
| H | 1.76480600  | -3.41583400 | -0.01743600 |          |                   |                    |                    |
| C | 1.89095200  | 1.53889700  | 1.53712600  |          |                   |                    |                    |
| C | 2.56763900  | 2.76873200  | 1.42544900  |          |                   |                    |                    |
| C | 1.55204400  | 1.09711500  | 2.83292800  |          |                   |                    |                    |
| C | 2.89568500  | 3.52223000  | 2.55357200  |          |                   |                    |                    |
| H | 2.83616500  | 3.13739600  | 0.43810900  |          |                   |                    |                    |
| C | 1.88305500  | 1.84784200  | 3.95928600  |          |                   |                    |                    |
| H | 1.00522400  | 0.16630200  | 2.95736400  |          |                   |                    |                    |

25  
Zero-point correction= 0.587750 (Hartree/Particle)  
Thermal correction to Energy= 0.624616  
Thermal correction to Enthalpy= 0.625560  
Thermal correction to Gibbs Free Energy= 0.511320  
E(Solv)= -2029.15848187

|   |             |             |             |
|---|-------------|-------------|-------------|
| C | -4.75685800 | 0.35909700  | -0.74710000 |
| O | -4.04112900 | -0.61857900 | -1.53617300 |
| C | -2.72164600 | -0.48406000 | -1.23310800 |
| C | -3.66480400 | 0.99991500  | 0.15946700  |
| H | -5.21402800 | 1.08027600  | -1.43068900 |
| H | -5.53840100 | -0.16304600 | -0.19048500 |
| H | -3.79706800 | 0.69017800  | 1.20257000  |
| N | -2.41428600 | 0.38145500  | -0.33285200 |
| C | -1.81665700 | -1.33773700 | -2.03603300 |
| C | -2.24525600 | -1.64311200 | -3.33778600 |
| C | -0.57313000 | -1.83587300 | -1.56514800 |

|    |             |             |             |
|----|-------------|-------------|-------------|
| C  | -1.45031500 | -2.39582700 | -4.19907900 |
| H  | -3.20820900 | -1.27311300 | -3.67144000 |
| C  | 0.20339100  | -2.59657800 | -2.44959500 |
| C  | -0.21844600 | -2.86791600 | -3.75341300 |
| H  | -1.79406200 | -2.60853800 | -5.20722500 |
| H  | 1.15623300  | -2.98912100 | -2.11254400 |
| H  | 0.41588800  | -3.45600300 | -4.41130200 |
| P  | 0.02062100  | -1.46555200 | 0.16211000  |
| Pd | -0.36901000 | 0.80360000  | 0.61248900  |
| C  | -3.66092200 | 2.51553300  | 0.10495300  |
| C  | -3.18134200 | 3.19683100  | -1.02153200 |
| C  | -4.19847900 | 3.25328200  | 1.16475300  |
| C  | -3.23879800 | 4.58874900  | -1.08351000 |
| H  | -2.74161500 | 2.63573500  | -1.84177400 |
| C  | -4.26182100 | 4.64733900  | 1.10304100  |
| H  | -4.56608800 | 2.73463200  | 2.04775600  |
| C  | -3.78172100 | 5.31836700  | -0.02206300 |
| H  | -2.85498800 | 5.10544500  | -1.95923200 |
| H  | -4.67986800 | 5.20630300  | 1.93595100  |
| H  | -3.82457700 | 6.40303000  | -0.07090100 |
| C  | 1.68622900  | -2.26400800 | 0.22246800  |
| C  | 1.89791400  | -3.62629500 | 0.49211200  |
| C  | 2.79783300  | -1.43179900 | 0.01355500  |
| C  | 3.19357900  | -4.14363200 | 0.53816400  |
| H  | 1.05251700  | -4.28332000 | 0.67347600  |
| C  | 4.09290800  | -1.95278100 | 0.05211400  |
| H  | 2.64820800  | -0.36956500 | -0.15497400 |
| C  | 4.29217700  | -3.30949900 | 0.31453000  |
| H  | 3.34452600  | -5.19883100 | 0.75185100  |
| H  | 4.94028900  | -1.29094300 | -0.10448500 |
| H  | 5.29983900  | -3.71518100 | 0.35476500  |
| C  | -1.03196800 | -2.60564700 | 1.17669700  |
| C  | -1.66479100 | -3.75054600 | 0.66733900  |
| C  | -1.19987200 | -2.29107300 | 2.53591800  |
| C  | -2.44037400 | -4.56331000 | 1.49800800  |
| H  | -1.55563100 | -4.01021700 | -0.38169200 |
| C  | -1.96721800 | -3.10838500 | 3.36687400  |
| H  | -0.73166600 | -1.39452000 | 2.93446500  |
| C  | -2.59098900 | -4.24600100 | 2.84914500  |
| H  | -2.92556600 | -5.44521900 | 1.08747300  |
| H  | -2.08450300 | -2.85160500 | 4.41653400  |
| H  | -3.19459900 | -4.87920100 | 3.49411000  |
| C  | 3.48712900  | 1.98449100  | 1.10922200  |
| C  | 2.23021600  | 2.33884200  | 0.75220300  |

|   |                    |                   |                   |
|---|--------------------|-------------------|-------------------|
| H | 3.62258500         | 1.51732700        | 2.08570100        |
| H | 2.05774100         | 2.81268500        | -0.21468500       |
| C | 1.03990800         | 2.14798800        | 1.57500300        |
| C | -0.18713500        | 2.80681600        | 1.30441700        |
| H | 1.22560000         | 1.78120700        | 2.58542200        |
| C | 4.71258000         | 2.13503900        | 0.32241600        |
| C | 5.93377700         | 1.68325500        | 0.86468700        |
| C | 4.75055600         | 2.70820000        | -0.96691000       |
| C | 7.13132100         | 1.79537200        | 0.15974400        |
| H | 5.93396800         | 1.24098100        | 1.85873800        |
| C | 5.94622400         | 2.82109500        | -1.67011400       |
| H | 3.83358200         | 3.07090700        | -1.42255600       |
| C | 7.14650500         | 2.36574900        | -1.11442800       |
| H | 8.05500500         | 1.43815900        | 0.60880100        |
| H | 5.94289700         | 3.26855100        | -2.66122800       |
| H | 8.07774900         | 2.45614900        | -1.66707900       |
| H | -0.88742900        | 2.99558700        | 2.11613900        |
| H | <u>-0.25238100</u> | <u>3.51611300</u> | <u>0.47969100</u> |

26-ts

Zero-point correction= 0.952594 (Hartree/Particle)

Thermal correction to Energy= 1.008496

Thermal correction to Enthalpy= 1.009440

Thermal correction to Gibbs Free Energy= 0.847905

E(Solv)= -2821.34636531

|   |            |             |             |
|---|------------|-------------|-------------|
| C | 4.50694600 | 3.51732300  | 1.52988000  |
| O | 5.27821800 | 2.79211100  | 0.54099200  |
| C | 4.47317700 | 1.84453300  | 0.01104200  |
| C | 3.06365900 | 2.96783200  | 1.36598400  |
| H | 4.93502600 | 3.29966600  | 2.51206300  |
| H | 4.59991900 | 4.58354400  | 1.31526300  |
| H | 2.42423100 | 3.70471000  | 0.86683800  |
| N | 3.24825100 | 1.84292400  | 0.41870200  |
| C | 5.12585200 | 0.97854900  | -0.99790000 |
| C | 6.30510600 | 1.48692600  | -1.56993900 |
| C | 4.64376600 | -0.29393900 | -1.40864100 |
| C | 6.99974100 | 0.77890800  | -2.54737500 |
| H | 6.67021000 | 2.45328100  | -1.24428300 |
| C | 5.36698900 | -0.98957400 | -2.38694700 |
| C | 6.52804500 | -0.46415900 | -2.95861300 |
| H | 7.90202600 | 1.20005000  | -2.98012100 |
| H | 5.01748900 | -1.96326000 | -2.71181900 |
| H | 7.05788900 | -1.03155800 | -3.71835400 |
| P | 3.11072000 | -1.05525600 | -0.68934800 |

|    |             |             |             |   |              |             |             |
|----|-------------|-------------|-------------|---|--------------|-------------|-------------|
| Pd | 1.54788900  | 0.66723000  | -0.30220300 | C | -0.29688500  | 5.67780100  | -0.73354600 |
| C  | 2.41097600  | 2.56982300  | 2.67560600  | H | -0.65761900  | 4.31812300  | 0.89612400  |
| C  | 2.74734100  | 1.37403800  | 3.32440600  | C | 0.31453900   | 4.66273600  | -2.83469300 |
| C  | 1.49572700  | 3.43807200  | 3.28336400  | H | 0.47578300   | 2.52263800  | -2.84769100 |
| C  | 2.17376400  | 1.05331200  | 4.55532700  | C | 0.04728200   | 5.80933700  | -2.08022400 |
| H  | 3.44890600  | 0.68558200  | 2.86215000  | H | -0.51263900  | 6.56055800  | -0.13739600 |
| C  | 0.92637800  | 3.12124300  | 4.51883000  | H | 0.58699100   | 4.75408600  | -3.88280200 |
| H  | 1.22952700  | 4.36919800  | 2.78811800  | H | 0.10693000   | 6.79249000  | -2.53800200 |
| C  | 1.26335500  | 1.92620100  | 5.15696100  | H | -1.18519500  | -2.57973900 | -0.14529700 |
| H  | 2.44224000  | 0.12123800  | 5.04505700  | H | -1.11999700  | -1.86299300 | -1.82176100 |
| H  | 0.22252800  | 3.80783600  | 4.98117900  | C | -6.48350200  | 1.03688500  | -0.61098500 |
| H  | 0.82287700  | 1.67816400  | 6.11862100  | C | -5.96854100  | -0.01664400 | -1.26894200 |
| C  | 3.71919200  | -1.91037000 | 0.82649600  | H | -5.78697000  | 1.69709400  | -0.09088100 |
| C  | 5.06414400  | -2.25673000 | 1.03061100  | H | -6.61917900  | -0.69109300 | -1.82354800 |
| C  | 2.77636800  | -2.22899800 | 1.81882700  | C | -4.49144400  | -0.29179600 | -1.36550900 |
| C  | 5.45514500  | -2.91122800 | 2.20111400  | C | -4.01715400  | -0.32982700 | -2.82528200 |
| H  | 5.80950200  | -2.01742800 | 0.27832700  | H | -3.94406500  | 0.50325100  | -0.84636300 |
| C  | 3.16793600  | -2.89224700 | 2.98214500  | H | -2.96345700  | -0.61371400 | -2.90317200 |
| H  | 1.73530700  | -1.95016800 | 1.67825000  | C | -7.89202800  | 1.43798900  | -0.50388900 |
| C  | 4.50912400  | -3.23218400 | 3.17644000  | C | -8.20914500  | 2.57413000  | 0.26169500  |
| H  | 6.49966300  | -3.17134700 | 2.34824100  | C | -8.94363600  | 0.74111200  | -1.12912400 |
| H  | 2.42759900  | -3.13714000 | 3.73888700  | C | -9.52847800  | 3.00125200  | 0.40350500  |
| H  | 4.81606400  | -3.74226600 | 4.08516100  | H | -7.40890400  | 3.12659100  | 0.74896200  |
| C  | 2.70090300  | -2.41661500 | -1.86048000 | C | -10.26057400 | 1.16667000  | -0.98810200 |
| C  | 1.96396700  | -2.08474100 | -3.01059700 | H | -8.73320000  | -0.13675400 | -1.73329800 |
| C  | 3.06258200  | -3.75520700 | -1.64725600 | C | -10.55917600 | 2.29794000  | -0.22095900 |
| C  | 1.61771400  | -3.06636200 | -3.93857500 | H | -9.75045000  | 3.88195100  | 0.99927100  |
| H  | 1.66596300  | -1.05194800 | -3.17632900 | H | -11.05896500 | 0.61729800  | -1.47890300 |
| C  | 2.70130900  | -4.73906800 | -2.57140300 | H | -11.58861200 | 2.62750100  | -0.11436700 |
| H  | 3.62744400  | -4.03252500 | -0.76277400 | H | -4.13521800  | 0.66985100  | -3.25301900 |
| C  | 1.98407900  | -4.39720100 | -3.71890300 | C | -4.30725200  | -1.42578800 | 0.83884500  |
| H  | 1.05866100  | -2.79454600 | -4.82993300 | C | -3.99186500  | -2.68843100 | 1.61463300  |
| H  | 2.98714300  | -5.77231600 | -2.39479000 | C | -3.88028300  | -3.93398800 | 0.98156500  |
| H  | 1.70985500  | -5.16370800 | -4.43832400 | C | -3.99899300  | -4.03662300 | -0.52418200 |
| C  | -0.19758300 | 1.92985700  | -0.23252300 | C | -4.67880700  | -2.81550700 | -1.14327300 |
| C  | -0.53021600 | 0.71411400  | -0.91447600 | H | -3.94117200  | -1.63326400 | 3.49498700  |
| H  | -0.46477800 | 1.98197800  | 0.82463300  | H | -3.67807000  | -0.59829200 | 1.18762100  |
| H  | -0.64859300 | 0.71119000  | -1.99727100 | C | -3.85096000  | -2.60143300 | 3.00671700  |
| C  | -0.84131300 | -0.48077600 | -0.21185900 | C | -3.62870800  | -5.07392100 | 1.75752400  |
| C  | -1.31643800 | -1.68847300 | -0.76126400 | H | -3.00363600  | -4.16434600 | -0.97051800 |
| H  | -0.82605500 | -0.40742400 | 0.87778400  | H | -5.74915600  | -2.80607300 | -0.90550100 |
| C  | -0.10912600 | 3.24764600  | -0.89426100 | C | -3.49202000  | -4.98377100 | 3.14001300  |
| C  | -0.37488800 | 4.41312000  | -0.15008800 | C | -3.60408200  | -3.73993500 | 3.76873500  |
| C  | 0.24107700  | 3.40006700  | -2.25094900 | H | -3.54336200  | -6.04085300 | 1.26692000  |



|   |             |             |             |
|---|-------------|-------------|-------------|
| H | -3.30282200 | -5.87814600 | 3.72644700  |
| H | -3.50028700 | -3.65932700 | 4.84681700  |
| N | -4.06880500 | -1.55711600 | -0.62481500 |
| H | -5.35074000 | -1.12316100 | 0.99013100  |
| H | -4.57007400 | -2.82969600 | -2.22899000 |
| H | -4.57418500 | -4.92758400 | -0.80233700 |
| H | -2.81453500 | -1.60465200 | -0.72300500 |
| H | -4.61190300 | -1.01511500 | -3.43759900 |

27-ts

Zero-point correction= 0.951465 (Hartree/Particle)

Thermal correction to Energy= 1.007413

Thermal correction to Enthalpy= 1.008357

Thermal correction to Gibbs Free Energy= 0.851572

E(Solv)= -2821.34226348

|    |            |             |             |
|----|------------|-------------|-------------|
| C  | 4.28065800 | 1.95014600  | -2.64550600 |
| O  | 4.04839100 | 0.58727600  | -3.06655000 |
| C  | 3.09063200 | 0.07437800  | -2.25562800 |
| C  | 3.30055700 | 2.15160600  | -1.45110000 |
| H  | 5.33033500 | 2.04388300  | -2.35763100 |
| H  | 4.07316100 | 2.60432800  | -3.49548400 |
| H  | 2.54750300 | 2.90776000  | -1.70319500 |
| N  | 2.61391700 | 0.84213400  | -1.34069000 |
| C  | 2.74829600 | -1.33395900 | -2.55914500 |
| C  | 3.76941200 | -2.10086700 | -3.14415000 |
| C  | 1.46635700 | -1.90921100 | -2.35083300 |
| C  | 3.55912800 | -3.42706700 | -3.51232400 |
| H  | 4.73503800 | -1.63943300 | -3.31418000 |
| C  | 1.27118500 | -3.23428600 | -2.76556600 |
| C  | 2.30033900 | -3.99123800 | -3.33048900 |
| H  | 4.36749900 | -4.00232100 | -3.95320400 |
| H  | 0.29400100 | -3.68866700 | -2.66297000 |
| H  | 2.10527900 | -5.01514700 | -3.63639900 |
| P  | 0.07888100 | -0.94573700 | -1.56194000 |
| Pd | 0.83697800 | 0.24817000  | 0.37966900  |
| C  | 4.00562900 | 2.57588000  | -0.17502100 |
| C  | 4.74829400 | 1.65727600  | 0.58040300  |
| C  | 3.97059700 | 3.91554400  | 0.23006200  |
| C  | 5.43476700 | 2.07254900  | 1.72211500  |
| H  | 4.77550200 | 0.61167500  | 0.28580600  |
| C  | 4.66172300 | 4.33400500  | 1.36960900  |
| H  | 3.40205500 | 4.63949500  | -0.35037000 |
| C  | 5.39391000 | 3.41213300  | 2.11955200  |
| H  | 5.99920500 | 1.34781800  | 2.30206700  |

|   |             |             |             |
|---|-------------|-------------|-------------|
| H | 4.62578900  | 5.37725000  | 1.67023300  |
| H | 5.93118100  | 3.73506400  | 3.00668700  |
| C | -1.38295700 | -2.08168000 | -1.65003400 |
| C | -2.53036000 | -1.73674200 | -2.38101200 |
| C | -1.38964100 | -3.29219500 | -0.93309300 |
| C | -3.64770800 | -2.57542700 | -2.39154000 |
| H | -2.56011700 | -0.81338900 | -2.94773500 |
| C | -2.49993100 | -4.13492200 | -0.95678600 |
| H | -0.51074500 | -3.59799800 | -0.37589500 |
| C | -3.63739100 | -3.77572700 | -1.68346200 |
| H | -4.52728000 | -2.28483600 | -2.95813200 |
| H | -2.47578900 | -5.07228200 | -0.40759100 |
| H | -4.50751800 | -4.42494400 | -1.69416600 |
| C | -0.31735800 | 0.31591000  | -2.85401600 |
| C | -0.03732500 | 0.10348600  | -4.21310900 |
| C | -0.96971500 | 1.49725900  | -2.46971800 |
| C | -0.39324900 | 1.06110700  | -5.16474300 |
| H | 0.45444300  | -0.80920300 | -4.53483100 |
| C | -1.33661700 | 2.44686900  | -3.42550800 |
| H | -1.19401300 | 1.67270500  | -1.42185000 |
| C | -1.04384800 | 2.23366100  | -4.77405200 |
| H | -0.16783800 | 0.88576000  | -6.21293400 |
| H | -1.85285300 | 3.35089600  | -3.11392500 |
| H | -1.32450500 | 2.97424100  | -5.51763800 |
| C | -3.65337000 | -1.81465400 | 2.36991400  |
| C | -2.52278200 | -1.08986400 | 2.35531600  |
| H | -3.76109700 | -2.57571700 | 3.14530000  |
| H | -2.34715300 | -0.33862300 | 1.58689500  |
| C | -1.48464000 | -1.16745100 | 3.44513000  |
| C | -1.53524000 | 0.10651700  | 4.30666900  |
| H | -1.72235200 | -2.01916900 | 4.10179900  |
| H | -0.91312500 | 0.03954100  | 5.20332500  |
| H | -1.23825200 | 0.99356300  | 3.74016000  |
| C | -4.80154200 | -1.70047100 | 1.45900000  |
| C | -5.75067600 | -2.73755100 | 1.42933100  |
| C | -5.01169200 | -0.58136400 | 0.63206900  |
| C | -6.85929400 | -2.67442700 | 0.58622700  |
| H | -5.61350200 | -3.60189300 | 2.07521000  |
| C | -6.12005200 | -0.51613900 | -0.20817900 |
| H | -4.32025800 | 0.25585500  | 0.66520900  |
| C | -7.04669000 | -1.56331000 | -0.23813300 |
| H | -7.58097300 | -3.48655500 | 0.58082100  |
| H | -6.27084300 | 0.36167200  | -0.83063400 |
| H | -7.91594200 | -1.50481600 | -0.88716000 |

|   |             |             |             |
|---|-------------|-------------|-------------|
| H | -2.56818000 | 0.25163000  | 4.63437900  |
| C | 0.96439500  | -1.24143800 | 3.88032700  |
| C | 2.33142800  | -1.71783800 | 3.43748800  |
| C | 2.47941100  | -2.67180300 | 2.42381400  |
| C | 1.26161500  | -3.16370100 | 1.67514900  |
| C | -0.04827900 | -2.85693200 | 2.39801800  |
| H | 3.34573600  | -0.49329800 | 4.89546600  |
| H | 1.01231400  | -0.18213500 | 4.13027600  |
| C | 3.46412000  | -1.23159900 | 4.10501600  |
| C | 3.76289500  | -3.12629400 | 2.09272400  |
| H | 1.24755300  | -2.69962000 | 0.68091000  |
| H | -0.15918600 | -3.51268200 | 3.27554700  |
| C | 4.88619400  | -2.64489000 | 2.76126000  |
| C | 4.73617300  | -1.69185600 | 3.77362300  |
| H | 3.87676600  | -3.87087000 | 1.30786900  |
| H | 5.87353600  | -3.01544900 | 2.50090800  |
| H | 5.60527100  | -1.31495000 | 4.30511700  |
| N | -0.10903900 | -1.44756300 | 2.87292000  |
| H | 0.11617100  | -0.58492600 | 1.67966600  |
| H | 0.66765200  | -1.77315900 | 4.79999500  |
| H | -0.90753200 | -3.02298700 | 1.74719400  |
| H | 1.32216300  | -4.24746600 | 1.51364000  |
| C | -1.54481200 | 3.68421900  | 0.45207000  |
| C | -0.90367200 | 2.79085700  | 1.24387200  |
| H | -0.96412900 | 4.15550800  | -0.34213500 |
| H | -1.42813600 | 2.31709100  | 2.06965000  |
| C | 0.49803800  | 2.45954000  | 1.07539800  |
| C | 1.28257800  | 1.76015400  | 1.98042000  |
| H | 1.00003800  | 2.96544800  | 0.25134500  |
| C | -2.93845200 | 4.11643700  | 0.53336700  |
| C | -3.37854300 | 5.14322300  | -0.32460100 |
| C | -3.87350900 | 3.55103700  | 1.42506800  |
| C | -4.69685900 | 5.59318300  | -0.29376300 |
| H | -2.67041100 | 5.59667500  | -1.01467700 |
| C | -5.19018300 | 3.99882100  | 1.45406900  |
| H | -3.57044800 | 2.75512600  | 2.09932500  |
| C | -5.60840200 | 5.02214900  | 0.59599600  |
| H | -5.01172100 | 6.38977600  | -0.96174100 |
| H | -5.89552900 | 3.55024500  | 2.14794200  |
| H | -6.63692100 | 5.37002500  | 0.62329400  |
| H | 2.36471300  | 1.82546600  | 1.93678800  |
| H | 0.85671800  | 1.46582300  | 2.93335900  |

Zero-point correction= 0.598740 (Hartree/Particle)  
Thermal correction to Energy=0.635753  
Thermal correction to Enthalpy= 0.636697  
Thermal correction to Gibbs Free Energy= 0.522630  
E(Solv)=-2029.61102079

|    |             |             |             |
|----|-------------|-------------|-------------|
| C  | 0.98111300  | -3.35239600 | 2.25932600  |
| O  | 2.24622900  | -2.76112800 | 1.87278500  |
| C  | 1.99259900  | -1.85402900 | 0.91351000  |
| C  | -0.01687300 | -2.83519800 | 1.18667000  |
| H  | 1.10086600  | -4.43628500 | 2.25897600  |
| H  | 0.74897600  | -3.00256400 | 3.26883500  |
| H  | -0.87570100 | -2.35788100 | 1.66855800  |
| N  | 0.77289400  | -1.78704600 | 0.48407900  |
| C  | 3.18469900  | -1.10430100 | 0.45745400  |
| C  | 4.41465600  | -1.77439700 | 0.55255700  |
| C  | 3.14748600  | 0.21925900  | -0.04759800 |
| C  | 5.59501300  | -1.17010800 | 0.12366500  |
| H  | 4.43769200  | -2.77930400 | 0.95780600  |
| C  | 4.34625000  | 0.81232600  | -0.46211600 |
| C  | 5.56038100  | 0.12472300  | -0.38680300 |
| H  | 6.53334300  | -1.71161700 | 0.19189800  |
| H  | 4.33556700  | 1.82537300  | -0.84829400 |
| H  | 6.47284900  | 0.60837600  | -0.72240700 |
| P  | 1.57227600  | 1.17577000  | -0.13614900 |
| Pd | -0.06473900 | -0.24876100 | -0.87502800 |
| C  | -0.51459800 | -3.93119800 | 0.25814600  |
| C  | 0.28980700  | -4.43864700 | -0.77194800 |
| C  | -1.77299800 | -4.50463400 | 0.48262800  |
| C  | -0.16265400 | -5.49358900 | -1.56635000 |
| H  | 1.26874400  | -4.00614600 | -0.96105300 |
| C  | -2.22453500 | -5.56262400 | -0.30916500 |
| H  | -2.40321600 | -4.12696600 | 1.28573100  |
| C  | -1.42052600 | -6.05739600 | -1.33737400 |
| H  | 0.46860900  | -5.87676200 | -2.36304600 |
| H  | -3.20252600 | -5.99687700 | -0.12322100 |
| H  | -1.77034900 | -6.87851700 | -1.95596700 |
| C  | 1.95688700  | 2.66703000  | -1.12648300 |
| C  | 2.36193800  | 3.86603400  | -0.51941100 |
| C  | 1.86616400  | 2.59676800  | -2.52638100 |
| C  | 2.67192600  | 4.97751500  | -1.30591900 |
| H  | 2.42865900  | 3.93865700  | 0.56148400  |
| C  | 2.18708600  | 3.70682100  | -3.30632400 |
| H  | 1.53700400  | 1.67782600  | -3.00361500 |
| C  | 2.58770600  | 4.89901900  | -2.69701100 |

|          |                    |                    |                    |    |             |             |             |
|----------|--------------------|--------------------|--------------------|----|-------------|-------------|-------------|
| H        | 2.97597100         | 5.90449600         | -0.82863900        | C  | -0.36949600 | 1.66954500  | 1.52941700  |
| H        | 2.11387000         | 3.64421600         | -4.38810700        | C  | 1.79818200  | 1.35536200  | 1.02997700  |
| H        | 2.82729800         | 5.76613700         | -3.30554400        | H  | 2.27298200  | 2.61290800  | 2.80481700  |
| C        | 1.25103100         | 1.74994700         | 1.57578200         | H  | 1.78993000  | 0.93383000  | 3.20539300  |
| C        | 2.27064800         | 1.84488200         | 2.53618800         | H  | 2.36147100  | 0.42212200  | 0.94095400  |
| C        | -0.05903800        | 2.12706100         | 1.91820300         | N  | 0.38761400  | 1.10956300  | 0.63550800  |
| C        | 1.98138200         | 2.31410400         | 3.81925700         | C  | -1.82955500 | 1.91426100  | 1.51817100  |
| H        | 3.28762300         | 1.55673700         | 2.28803100         | C  | -2.26948900 | 3.02339000  | 2.26189900  |
| C        | -0.33940500        | 2.60138200         | 3.19934100         | C  | -2.77672600 | 1.13629300  | 0.80659200  |
| H        | -0.85583700        | 2.04848500         | 1.18312900         | C  | -3.61368600 | 3.38782400  | 2.28276600  |
| C        | 0.67934800         | 2.69340800         | 4.15134100         | H  | -1.54454100 | 3.60802500  | 2.81507800  |
| H        | 2.77535900         | 2.38431500         | 4.55708300         | C  | -4.12434600 | 1.51631700  | 0.84760000  |
| H        | -1.35355300        | 2.89473300         | 3.45465100         | C  | -4.54392800 | 2.63497000  | 1.57087900  |
| H        | 0.45840300         | 3.05852800         | 5.15011200         | H  | -3.92682100 | 4.25660900  | 2.85331700  |
| H        | -0.52119900        | 0.92608900         | -1.76463300        | H  | -4.85952600 | 0.92946300  | 0.30804300  |
| C        | -4.12660500        | 0.03296500         | -0.13156600        | H  | -5.59503200 | 2.90766000  | 1.57831100  |
| C        | -3.23717300        | -0.09344900        | -1.14710300        | P  | -2.28630800 | -0.38178400 | -0.11447700 |
| H        | -4.08935000        | -0.71559700        | 0.66141000         | Pd | -0.19725200 | -0.08184300 | -1.08341700 |
| H        | -3.22560700        | 0.61576700         | -1.97159800        | C  | 2.46981200  | 2.43048500  | 0.18079500  |
| C        | -2.28925700        | -1.18547600        | -1.20827400        | C  | 1.75182300  | 3.31711100  | -0.62957600 |
| C        | -1.44155100        | -1.45915500        | -2.26277000        | C  | 3.86442800  | 2.56731600  | 0.26519500  |
| H        | -2.34549300        | -1.91434500        | -0.40133900        | C  | 2.41673700  | 4.31514400  | -1.34916400 |
| C        | -5.15778600        | 1.05114700         | 0.03716700         | H  | 0.67272100  | 3.22843100  | -0.70760100 |
| C        | -5.99831000        | 0.97770700         | 1.16541800         | C  | 4.52655600  | 3.56724800  | -0.44682800 |
| C        | -5.35692000        | 2.10737500         | -0.87626600        | H  | 4.43599400  | 1.88922300  | 0.89634200  |
| C        | -7.00087400        | 1.92094500         | 1.37731300         | C  | 3.80281800  | 4.44325500  | -1.26059700 |
| H        | -5.86071300        | 0.16732700         | 1.87760500         | H  | 1.84594100  | 4.99583000  | -1.97459800 |
| C        | -6.35751400        | 3.04883000         | -0.66357000        | H  | 5.60579800  | 3.66214900  | -0.36772000 |
| H        | -4.72858100        | 2.19129700         | -1.75796200        | H  | 4.31694900  | 5.22068600  | -1.81788600 |
| C        | -7.18351500        | 2.96011700         | 0.46294500         | C  | -3.70003600 | -0.75131200 | -1.22157900 |
| H        | -7.63988900        | 1.84448000         | 2.25217900         | C  | -4.70700400 | -1.66174700 | -0.86662100 |
| H        | -6.49871500        | 3.85488700         | -1.37780600        | C  | -3.77093700 | -0.09320900 | -2.46107400 |
| H        | -7.96529600        | 3.69680600         | 0.62338400         | C  | -5.76826400 | -1.90729600 | -1.74110000 |
| H        | -0.92447700        | -2.41222200        | -2.31077100        | H  | -4.66320500 | -2.18328800 | 0.08429500  |
| <u>H</u> | <u>-1.49247200</u> | <u>-0.88127100</u> | <u>-3.18102900</u> | C  | -4.83783700 | -0.33407900 | -3.32532000 |

29-ts

Zero-point correction= 0.597488 (Hartree/Particle)

Thermal correction to Energy= 0.633958

Thermal correction to Enthalpy= 0.634903

Thermal correction to Gibbs Free Energy= 0.522858

E(Solv)= -2029.60512671

|   |            |            |            |
|---|------------|------------|------------|
| C | 1.65035900 | 1.76842600 | 2.51088500 |
| O | 0.26295600 | 2.18088200 | 2.59993700 |

|    |             |             |             |
|----|-------------|-------------|-------------|
| C  | -0.36949600 | 1.66954500  | 1.52941700  |
| C  | 1.79818200  | 1.35536200  | 1.02997700  |
| H  | 2.27298200  | 2.61290800  | 2.80481700  |
| H  | 1.78993000  | 0.93383000  | 3.20539300  |
| H  | 2.36147100  | 0.42212200  | 0.94095400  |
| N  | 0.38761400  | 1.10956300  | 0.63550800  |
| C  | -1.82955500 | 1.91426100  | 1.51817100  |
| C  | -2.26948900 | 3.02339000  | 2.26189900  |
| C  | -2.77672600 | 1.13629300  | 0.80659200  |
| C  | -3.61368600 | 3.38782400  | 2.28276600  |
| H  | -1.54454100 | 3.60802500  | 2.81507800  |
| C  | -4.12434600 | 1.51631700  | 0.84760000  |
| C  | -4.54392800 | 2.63497000  | 1.57087900  |
| H  | -3.92682100 | 4.25660900  | 2.85331700  |
| H  | -4.85952600 | 0.92946300  | 0.30804300  |
| H  | -5.59503200 | 2.90766000  | 1.57831100  |
| P  | -2.28630800 | -0.38178400 | -0.11447700 |
| Pd | -0.19725200 | -0.08184300 | -1.08341700 |
| C  | 2.46981200  | 2.43048500  | 0.18079500  |
| C  | 1.75182300  | 3.31711100  | -0.62957600 |
| C  | 3.86442800  | 2.56731600  | 0.26519500  |
| C  | 2.41673700  | 4.31514400  | -1.34916400 |
| H  | 0.67272100  | 3.22843100  | -0.70760100 |
| C  | 4.52655600  | 3.56724800  | -0.44682800 |
| H  | 4.43599400  | 1.88922300  | 0.89634200  |
| C  | 3.80281800  | 4.44325500  | -1.26059700 |
| H  | 1.84594100  | 4.99583000  | -1.97459800 |
| H  | 5.60579800  | 3.66214900  | -0.36772000 |
| H  | 4.31694900  | 5.22068600  | -1.81788600 |
| C  | -3.70003600 | -0.75131200 | -1.22157900 |
| C  | -4.70700400 | -1.66174700 | -0.86662100 |
| C  | -3.77093700 | -0.09320900 | -2.46107400 |
| C  | -5.76826400 | -1.90729600 | -1.74110000 |
| H  | -4.66320500 | -2.18328800 | 0.08429500  |
| C  | -4.83783700 | -0.33407900 | -3.32532000 |
| H  | -2.98989600 | 0.60592400  | -2.74989800 |
| C  | -5.83654600 | -1.24408700 | -2.96727200 |
| H  | -6.53977000 | -2.61895800 | -1.46192800 |
| H  | -4.88545600 | 0.18076000  | -4.28049600 |
| H  | -6.66237300 | -1.43870000 | -3.64526900 |
| C  | -2.25694800 | -1.71319500 | 1.14968400  |
| C  | -2.92208600 | -1.59926500 | 2.38069300  |
| C  | -1.55081000 | -2.89290100 | 0.85671700  |
| C  | -2.88171000 | -2.65014100 | 3.29952300  |

|   |             |             |             |
|---|-------------|-------------|-------------|
| H | -3.47179700 | -0.69607100 | 2.62628700  |
| C | -1.52056800 | -3.94215300 | 1.77452100  |
| H | -1.02658700 | -2.98864300 | -0.09055400 |
| C | -2.18376900 | -3.82101900 | 2.99831200  |
| H | -3.39815900 | -2.55209500 | 4.24999200  |
| H | -0.97540400 | -4.85105500 | 1.53688800  |
| H | -2.15482000 | -4.63619800 | 3.71540400  |
| H | -0.65877900 | -0.89443200 | -2.36005500 |
| C | 3.86445200  | -0.85841100 | -1.01601700 |
| C | 2.66032900  | -1.18127200 | -1.54883000 |
| H | 4.18239800  | 0.18088800  | -1.09377800 |
| H | 2.31864900  | -2.21555300 | -1.54288200 |
| C | 1.79356700  | -0.21949600 | -2.20902100 |
| C | 0.77981400  | -0.62170000 | -3.10469800 |
| H | 2.12441600  | 0.81651500  | -2.24222100 |
| C | 4.82391300  | -1.75169700 | -0.37044500 |
| C | 6.08924900  | -1.23974300 | -0.02152700 |
| C | 4.54883700  | -3.10289000 | -0.07538600 |
| C | 7.04750700  | -2.04422600 | 0.59112900  |
| H | 6.32121100  | -0.20151000 | -0.24774100 |
| C | 5.50517400  | -3.90510500 | 0.53749000  |
| H | 3.58031000  | -3.52799500 | -0.32291500 |
| C | 6.75866600  | -3.38064100 | 0.87284000  |
| H | 8.01872000  | -1.63006700 | 0.84598800  |
| H | 5.27595900  | -4.94411900 | 0.75651300  |
| H | 7.50273400  | -4.01137600 | 1.35040100  |
| H | 0.40634300  | 0.09064400  | -3.83505300 |
| H | 0.74002400  | -1.66225600 | -3.42130900 |

30

Zero-point correction= 0.072584 (Hartree/Particle)

Thermal correction to Energy= 0.076262

Thermal correction to Enthalpy= 0.077206

Thermal correction to Gibbs Free Energy= 0.046350

E(Solv)= -226.290238920

|   |             |             |             |
|---|-------------|-------------|-------------|
| C | -1.09736900 | -0.36702400 | -0.00013100 |
| C | -0.68448900 | 0.98352300  | 0.00003000  |
| C | 0.69087500  | 0.91869300  | 0.00001500  |
| N | 1.00481500  | -0.39775600 | 0.00005000  |
| H | 1.92334000  | -0.81383600 | 0.00012000  |
| H | -2.10307100 | -0.76357000 | -0.00022400 |
| H | -1.29867600 | 1.87032100  | 0.00004700  |
| H | 1.45258400  | 1.68385000  | 0.00003800  |
| N | -0.06599800 | -1.20051800 | 0.00002700  |

31

Zero-point correction= 0.242891 (Hartree/Particle)

Thermal correction to Energy= 0.256024

Thermal correction to Enthalpy= 0.256968

Thermal correction to Gibbs Free Energy=0.200742

E(Solv)= -613.524318877

|   |             |             |             |
|---|-------------|-------------|-------------|
| C | 3.83431000  | -1.43233200 | -0.65043800 |
| C | 2.53695300  | -0.93298800 | -0.72021700 |
| C | 2.18055000  | 0.24829100  | -0.04241400 |
| C | 3.17666900  | 0.90935300  | 0.69781300  |
| C | 4.47685700  | 0.41051800  | 0.76860700  |
| C | 4.81145600  | -0.76455200 | 0.09479700  |
| H | 4.08690300  | -2.34554900 | -1.18282600 |
| H | 1.79658000  | -1.46278200 | -1.31239600 |
| H | 2.92233600  | 1.82581100  | 1.22572400  |
| H | 5.22730500  | 0.94053600  | 1.34906200  |
| H | 5.82350900  | -1.15663200 | 0.14533900  |
| C | 0.82527000  | 0.82209200  | -0.07044900 |
| H | 0.73489700  | 1.78077100  | 0.43774500  |
| C | -0.26790400 | 0.29413900  | -0.64132600 |
| H | -0.21283200 | -0.66980000 | -1.14513800 |
| C | -1.63978700 | 0.92471500  | -0.67751500 |
| C | -1.77589600 | 2.27864900  | 0.02868900  |
| H | -1.52099400 | 2.20183500  | 1.09107000  |
| H | -1.12292800 | 3.02528100  | -0.43525200 |
| H | -1.93086900 | 1.05437400  | -1.72741900 |
| C | -4.54819600 | -0.94213600 | 0.00902000  |
| C | -3.77490600 | -1.45220800 | 1.07440400  |
| C | -2.54644100 | -0.83379300 | 0.93241700  |
| N | -2.63485000 | -0.02953100 | -0.16261700 |
| H | -5.57336600 | -1.17180100 | -0.25243600 |
| H | -4.06240900 | -2.17120700 | 1.82797300  |
| H | -1.63191100 | -0.90672500 | 1.50290500  |
| N | -3.85938400 | -0.07709300 | -0.73617600 |
| H | -2.81020300 | 2.62377000  | -0.05311900 |

32

Zero-point correction= 0.080563 (Hartree/Particle)

Thermal correction to Energy= 0.086904

Thermal correction to Enthalpy= 0.087849

Thermal correction to Gibbs Free Energy= 0.047779

E(Solv)= -687.146831365

|   |             |            |             |
|---|-------------|------------|-------------|
| C | -1.25418700 | 1.15572400 | -0.00018800 |
|---|-------------|------------|-------------|

|    |             |             |             |
|----|-------------|-------------|-------------|
| C  | -2.48350500 | 0.46421100  | 0.00072000  |
| C  | -2.13479700 | -0.87455500 | 0.00045000  |
| N  | -0.78036100 | -0.91872500 | -0.00081700 |
| H  | -1.07099800 | 2.22146300  | -0.00039700 |
| H  | -3.47992800 | 0.88003200  | 0.00132600  |
| H  | -2.73118800 | -1.77538700 | 0.00067200  |
| N  | -0.22479600 | 0.30943100  | -0.00095900 |
| H  | -0.17432100 | -1.72710300 | 0.00013700  |
| H  | 1.52704600  | 0.28832300  | -0.00115500 |
| Cl | 2.83531900  | -0.00556200 | 0.00035100  |

33-ts

Zero-point correction= 1.026275 (Hartree/Particle)

Thermal correction to Energy= 1.085781

Thermal correction to Enthalpy= 1.086726

Thermal correction to Gibbs Free Energy=0.926251

E(Solv)= -2906.62424475

|    |             |             |             |
|----|-------------|-------------|-------------|
| Pd | -1.35775700 | 0.03411200  | 0.23353200  |
| P  | -2.94980200 | 1.56597200  | 1.17118100  |
| P  | -2.65650100 | -1.92484600 | -0.44679700 |
| C  | -4.75401000 | 0.97579400  | 1.14327600  |
| C  | -5.45726100 | 0.57009700  | -0.13940900 |
| C  | -6.37194900 | 1.47185500  | -0.71018700 |
| C  | -7.17207800 | 1.14273300  | -1.80097100 |
| C  | -7.10806100 | -0.14663000 | -2.32183000 |
| C  | -6.23408700 | -1.06553100 | -1.74756800 |
| C  | -5.37456000 | -0.73541800 | -0.68534600 |
| C  | -4.52055700 | -1.83867700 | -0.08967400 |
| C  | -2.99147900 | 3.29794800  | 0.31315700  |
| C  | -2.95029100 | 3.00903300  | -1.20534100 |
| C  | -4.23235200 | 4.16217900  | 0.61562500  |
| C  | -1.74472300 | 4.12680500  | 0.68498000  |
| C  | -2.73681900 | 1.77816000  | 3.09112600  |
| C  | -3.10670500 | 0.43683600  | 3.76579700  |
| C  | -3.60108300 | 2.89050400  | 3.71691200  |
| C  | -1.25637200 | 2.04835000  | 3.42933100  |
| C  | -2.53468800 | -2.25627600 | -2.34418400 |
| C  | -2.65611300 | -0.87124500 | -3.02091000 |
| C  | -3.60648900 | -3.19166800 | -2.93693900 |
| C  | -1.15071900 | -2.83868800 | -2.68745000 |
| C  | -2.21734000 | -3.53231400 | 0.53844300  |
| C  | -2.82658100 | -4.83320500 | -0.01752900 |
| C  | -0.68281800 | -3.67274800 | 0.59727500  |
| C  | -2.71090200 | -3.34598000 | 1.99141900  |

|   |             |             |             |
|---|-------------|-------------|-------------|
| H | -4.74326200 | 0.11472100  | 1.81574100  |
| H | -5.35971700 | 1.74048800  | 1.64063700  |
| H | -6.49283900 | 2.45106600  | -0.25936500 |
| H | -7.86224200 | 1.87532500  | -2.20972900 |
| H | -7.74973300 | -0.44756800 | -3.14510600 |
| H | -6.24340600 | -2.08734900 | -2.11223700 |
| H | -4.96087300 | -2.80391500 | -0.36127600 |
| H | -4.56800600 | -1.77807100 | 1.00142600  |
| H | -2.04955000 | 2.45328100  | -1.48326100 |
| H | -3.81886200 | 2.43391900  | -1.53969000 |
| H | -2.94739200 | 3.96060000  | -1.75377300 |
| H | -5.16036100 | 3.69391200  | 0.28835200  |
| H | -4.33004600 | 4.41436700  | 1.67311700  |
| H | -4.14094100 | 5.10685400  | 0.06336200  |
| H | -1.71380100 | 5.01755300  | 0.04379400  |
| H | -1.77429600 | 4.47855600  | 1.72061800  |
| H | -0.81371200 | 3.57992700  | 0.53040100  |
| H | -2.60410400 | -0.40980500 | 3.28708500  |
| H | -2.77796700 | 0.46601000  | 4.81236800  |
| H | -4.18426000 | 0.24691100  | 3.77558900  |
| H | -4.66412600 | 2.79422300  | 3.47255200  |
| H | -3.51525200 | 2.83361400  | 4.81025300  |
| H | -3.26781500 | 3.88917700  | 3.42169800  |
| H | -0.86994400 | 2.95953900  | 2.96786800  |
| H | -1.15655200 | 2.16361500  | 4.51664100  |
| H | -0.62214000 | 1.21308600  | 3.12251000  |
| H | -2.56850300 | -0.99282200 | -4.10901900 |
| H | -3.61731700 | -0.39175500 | -2.81468300 |
| H | -1.86072100 | -0.19533900 | -2.68939600 |
| H | -3.61857600 | -4.17879900 | -2.47041500 |
| H | -4.60795500 | -2.76744900 | -2.87509000 |
| H | -3.38833700 | -3.33907700 | -4.00314200 |
| H | -1.00881900 | -2.79507200 | -3.77548100 |
| H | -0.33799000 | -2.27865500 | -2.22272100 |
| H | -1.05869500 | -3.88868500 | -2.39351900 |
| H | -2.61261400 | -5.65429700 | 0.67979600  |
| H | -3.91532200 | -4.78017000 | -0.12708100 |
| H | -2.39617400 | -5.11281800 | -0.98284300 |
| H | -0.22407000 | -2.78820000 | 1.04629000  |
| H | -0.42527500 | -4.54206900 | 1.21698400  |
| H | -0.22948600 | -3.82182500 | -0.38399700 |
| H | -2.37550500 | -2.39346300 | 2.41505600  |
| H | -3.80004200 | -3.40581700 | 2.08176200  |
| H | -2.29194800 | -4.14725800 | 2.61331600  |

|   |             |             |             |                                          |                |                    |             |
|---|-------------|-------------|-------------|------------------------------------------|----------------|--------------------|-------------|
| C | 1.64994600  | -0.55380800 | 1.52996900  | H                                        | 8.90794900     | -4.74434400        | 2.58508600  |
| C | 1.00123100  | 0.03115200  | 0.29494400  |                                          |                |                    |             |
| H | 1.53767300  | -1.64174100 | 1.58629100  | 34-ts                                    |                |                    |             |
| H | 2.72562000  | -0.32632800 | 1.49400600  | Zero-point correction=                   | 1.026397       | (Hartree/Particle) |             |
| H | 1.22621000  | -0.11959200 | 2.44139100  | Thermal correction to Energy=            | 1.085948       |                    |             |
| C | 0.35553400  | 1.29888400  | 0.35891500  | Thermal correction to Enthalpy=          | 1.086892       |                    |             |
| H | 0.48152100  | 1.88428800  | 1.26364500  | Thermal correction to Gibbs Free Energy= | 0.927931       |                    |             |
| H | 0.30502100  | 1.89613700  | -0.55286900 | E(Solv)=                                 | -2906.61889013 |                    |             |
| C | 1.21946700  | -0.55095000 | -0.97548300 | Pd                                       | -1.27489100    | 0.52403300         | 0.68596300  |
| C | 2.07768100  | -1.64685700 | -1.26851200 | P                                        | -1.43029200    | 1.38341100         | -1.53667800 |
| H | 2.27195400  | -2.35486700 | -0.46108100 | P                                        | -3.39571700    | -0.60678000        | 1.14336400  |
| H | 1.91791800  | -2.13401700 | -2.23272200 | C                                        | -3.02151400    | 0.89924600         | -2.45731900 |
| H | 0.84467200  | 0.01900100  | -1.82686100 | C                                        | -3.45365700    | -0.54831700        | -2.61365500 |
| P | 5.30037300  | -0.13606100 | -0.55362100 | C                                        | -3.24316300    | -1.17409000        | -3.85451400 |
| O | 4.60186600  | 0.34102300  | 0.68532000  | C                                        | -3.71577400    | -2.45085800        | -4.14466700 |
| O | 4.45392800  | -0.59577100 | -1.75555400 | C                                        | -4.47157300    | -3.12586000        | -3.19030700 |
| H | 3.22322200  | -1.09013600 | -1.45564700 | C                                        | -4.72422200    | -2.50835400        | -1.96870700 |
| O | 6.37213800  | 0.97750700  | -1.10407900 | C                                        | -4.21124200    | -1.24252500        | -1.63662400 |
| O | 6.33581600  | -1.36031600 | -0.26456000 | C                                        | -4.61976000    | -0.63506100        | -0.30746100 |
| C | 5.89800200  | 2.31327600  | -1.29928100 | C                                        | 0.00663000     | 0.83151900         | -2.70841600 |
| H | 5.44413900  | 2.68126900  | -0.36991600 | C                                        | 0.26188600     | -0.66188100        | -2.39951400 |
| H | 5.12353300  | 2.31641000  | -2.07998900 | C                                        | -0.29493200    | 0.97587600         | -4.21493600 |
| C | 7.07555700  | 3.18602100  | -1.71557000 | C                                        | 1.30225100     | 1.61646600         | -2.41402300 |
| H | 7.84458600  | 3.13474400  | -0.93292700 | C                                        | -1.61917300    | 3.31756700         | -1.60400200 |
| H | 7.52418600  | 2.76204600  | -2.62382100 | C                                        | -2.99341600    | 3.69907200         | -1.01044800 |
| C | 6.67418300  | 4.64604800  | -1.96072400 | C                                        | -1.52371600    | 3.92477400         | -3.01781000 |
| H | 6.21609700  | 5.05713600  | -1.04968900 | C                                        | -0.55332300    | 3.97473700         | -0.70264300 |
| H | 5.89650000  | 4.68564600  | -2.73698700 | C                                        | -3.18580200    | -2.46292300        | 1.63791900  |
| C | 7.85491100  | 5.52892000  | -2.37927600 | C                                        | -2.14098700    | -3.04080800        | 0.65480900  |
| H | 7.54082100  | 6.56566700  | -2.54849600 | C                                        | -4.45829400    | -3.33037500        | 1.57156700  |
| H | 8.63474200  | 5.53778900  | -1.60778200 | C                                        | -2.61354500    | -2.56782600        | 3.06531400  |
| H | 8.31281200  | 5.16281900  | -3.30645200 | C                                        | -4.48620200    | 0.29490300         | 2.47027700  |
| C | 7.21738200  | -1.25892600 | 0.86120700  | C                                        | -5.69687700    | -0.50459100        | 2.98796400  |
| H | 7.94537800  | -0.45624800 | 0.68055700  | C                                        | -3.58718800    | 0.68601500         | 3.66086600  |
| H | 6.63929200  | -0.99685800 | 1.75611900  | C                                        | -5.01129500    | 1.61045400         | 1.85388500  |
| C | 7.92545400  | -2.59635800 | 1.03717700  | H                                        | -3.80083700    | 1.43458300         | -1.90960000 |
| H | 8.45321600  | -2.84150200 | 0.10581800  | H                                        | -2.98071200    | 1.35604800         | -3.45170600 |
| H | 7.16854700  | -3.37892500 | 1.18292900  | H                                        | -2.72511700    | -0.62729700        | -4.63454400 |
| C | 8.91038100  | -2.59350700 | 2.21319100  | H                                        | -3.52266600    | -2.89346600        | -5.11779800 |
| H | 9.65683800  | -1.80055400 | 2.06267300  | H                                        | -4.88563100    | -4.10821100        | -3.39953600 |
| H | 8.37494800  | -2.33508400 | 3.13799200  | H                                        | -5.37025500    | -3.01259500        | -1.25757200 |
| C | 9.62585200  | -3.93617300 | 2.39772300  | H                                        | -5.54376000    | -1.11710700        | 0.02973900  |
| H | 10.19841800 | -4.20536400 | 1.50155000  | H                                        | -4.86327300    | 0.42029900         | -0.45776300 |
| H | 10.32325500 | -3.90632400 | 3.24318600  | H                                        | 0.64637700     | -0.80269600        | -1.38701200 |

|   |             |             |             |          |                   |                    |                   |
|---|-------------|-------------|-------------|----------|-------------------|--------------------|-------------------|
| H | -0.63825600 | -1.27153900 | -2.52905800 | C        | 1.14660700        | -1.68640100        | 2.02286600        |
| H | 1.02696000  | -1.04008300 | -3.08977600 | H        | 0.17633400        | -0.87506400        | 3.73950700        |
| H | -1.10052700 | 0.32019400  | -4.54465000 | P        | 4.21922500        | -0.63119400        | 0.83903200        |
| H | -0.53859000 | 1.99749800  | -4.51321700 | O        | 3.24198900        | -0.49542800        | -0.29480200       |
| H | 0.60277000  | 0.67991200  | -4.77299700 | O        | 3.73058400        | -1.28906900        | 2.14879800        |
| H | 2.12286300  | 1.14455200  | -2.96787000 | H        | 2.43729100        | -1.46706600        | 2.20283200        |
| H | 1.23892600  | 2.65784500  | -2.74565000 | O        | 5.58671200        | -1.39669200        | 0.37001000        |
| H | 1.58773900  | 1.58838500  | -1.36315800 | O        | 4.86719700        | 0.78640200         | 1.30102600        |
| H | -3.16343100 | 3.21261700  | -0.04544300 | C        | 5.45378700        | -2.69239700        | -0.22833100       |
| H | -3.01784400 | 4.78360200  | -0.84270600 | H        | 4.81831800        | -2.61949000        | -1.12061800       |
| H | -3.82831500 | 3.46091300  | -1.67654900 | H        | 4.96567600        | -3.37316600        | 0.48301700        |
| H | -2.23168800 | 3.47389500  | -3.72125900 | C        | 6.84412500        | -3.20095400        | -0.58657700       |
| H | -1.76341700 | 4.99525200  | -2.96115800 | H        | 7.31798600        | -2.48023500        | -1.26675100       |
| H | -0.51871400 | 3.84237300  | -3.43925300 | H        | 7.45623800        | -3.22150100        | 0.32476600        |
| H | 0.46834200  | 3.72666600  | -0.99607400 | C        | 6.81729200        | -4.59195200        | -1.23281200       |
| H | -0.66096800 | 5.06610200  | -0.76332600 | H        | 6.19235100        | -4.56342500        | -2.13688000       |
| H | -0.68903100 | 3.68126700  | 0.34173500  | H        | 6.33158800        | -5.30285300        | -0.54927500       |
| H | -1.95643100 | -4.09408400 | 0.90707200  | C        | 8.21368300        | -5.10879900        | -1.59552700       |
| H | -2.48415400 | -3.00323400 | -0.38272700 | H        | 8.16597700        | -6.10326600        | -2.05434900       |
| H | -1.18956600 | -2.50670800 | 0.72158400  | H        | 8.71216900        | -4.43693500        | -2.30514100       |
| H | -5.24663500 | -2.98962800 | 2.24514600  | H        | 8.85161900        | -5.18132900        | -0.70613200       |
| H | -4.87034200 | -3.39055500 | 0.56430200  | C        | 5.43783100        | 1.64522900         | 0.30363800        |
| H | -4.19655000 | -4.35465200 | 1.86917300  | H        | 6.34463000        | 1.17615500         | -0.10021300       |
| H | -2.29189100 | -3.60254400 | 3.24225600  | H        | 4.72498500        | 1.77328800         | -0.52098500       |
| H | -1.74322100 | -1.92347100 | 3.20585100  | C        | 5.76617800        | 2.98276800         | 0.95435400        |
| H | -3.35761600 | -2.32547500 | 3.83036600  | H        | 6.43968500        | 2.80518300         | 1.80317300        |
| H | -6.30524300 | 0.14506300  | 3.63186500  | H        | 4.84329500        | 3.40858700         | 1.37125200        |
| H | -6.34725600 | -0.85749800 | 2.18029300  | C        | 6.40642700        | 3.97478000         | -0.02514500       |
| H | -5.39951500 | -1.36583500 | 3.59192300  | H        | 7.32367400        | 3.53553800         | -0.44239000       |
| H | -2.76758500 | 1.33208000  | 3.33627100  | H        | 5.73100400        | 4.13498600         | -0.87791600       |
| H | -4.18490100 | 1.23768500  | 4.39921900  | C        | 6.73781700        | 5.32390300         | 0.62191500        |
| H | -3.15356800 | -0.17862700 | 4.16817200  | H        | 7.43901300        | 5.20022400         | 1.45627600        |
| H | -4.20683700 | 2.19206200  | 1.39397600  | H        | 7.19423800        | 6.01255500         | -0.09864600       |
| H | -5.79562200 | 1.44667800  | 1.10843200  | H        | 5.83513000        | 5.80494600         | 1.01858200        |
| H | -5.44857200 | 2.22616000  | 2.65056500  | H        | 1.18273900        | -1.63170300        | 0.93450800        |
| C | 0.00705200  | 1.72167800  | 3.45241700  | <u>H</u> | <u>0.96017300</u> | <u>-2.69297500</u> | <u>2.40068800</u> |
| C | 0.32816400  | 0.71983800  | 2.35367100  |          |                   |                    |                   |
| H | -0.61229400 | 1.28368800  | 4.24233700  |          |                   |                    |                   |
| H | 0.93591700  | 2.07402200  | 3.92217200  |          |                   |                    |                   |
| H | -0.51428200 | 2.60184300  | 3.06136500  |          |                   |                    |                   |
| C | 0.72770900  | 1.18413100  | 1.06860300  |          |                   |                    |                   |
| H | 0.87875100  | 2.25436400  | 0.95495800  |          |                   |                    |                   |
| H | 1.41080700  | 0.57472000  | 0.47961300  |          |                   |                    |                   |
| C | 0.48261400  | -0.64503400 | 2.71610300  |          |                   |                    |                   |

35-ts

Zero-point correction= 1.025876 (Hartree/Particle)

Thermal correction to Energy= 1.085704

Thermal correction to Enthalpy= 1.086648

Thermal correction to Gibbs Free Energy=0.926168

E(Solv)= -2906.60991603

Pd -1.15091100 0.17145100 0.53162300

|   |             |             |             |   |             |             |             |
|---|-------------|-------------|-------------|---|-------------|-------------|-------------|
| P | -2.19064800 | 2.04091200  | -0.71769300 | H | -2.66275700 | 4.73894700  | 1.92450700  |
| P | -2.92519100 | -1.19809400 | 1.30922000  | H | -3.97803600 | 3.98032700  | 1.02946400  |
| C | -4.07310800 | 1.98532500  | -0.91135800 | H | -3.26607300 | 4.92782600  | -1.26352600 |
| C | -4.72954400 | 0.75043200  | -1.49883800 | H | -2.23853600 | 5.90248700  | -0.21011300 |
| C | -5.24317700 | 0.83819900  | -2.80435100 | H | -1.53153100 | 5.08907600  | -1.60412400 |
| C | -5.92942300 | -0.20890100 | -3.41249000 | H | 0.22637400  | 3.80050000  | -0.12073400 |
| C | -6.15289400 | -1.37903700 | -2.69167000 | H | -0.40795800 | 4.87301400  | 1.13050300  |
| C | -5.69037700 | -1.46742700 | -1.38162200 | H | -0.33944100 | 3.12564200  | 1.41157800  |
| C | -4.96368400 | -0.43685500 | -0.76058500 | H | -2.45639100 | -4.14648400 | -1.00276200 |
| C | -4.62249400 | -0.57968100 | 0.71323100  | H | -3.28181600 | -2.60939100 | -1.29972500 |
| C | -1.49684700 | 2.08406700  | -2.52373200 | H | -1.56179800 | -2.62426100 | -0.86452700 |
| C | -1.49306900 | 0.61733400  | -3.01482300 | H | -4.45851400 | -3.95077900 | 2.10110100  |
| C | -2.31526300 | 2.93049700  | -3.51965300 | H | -5.05354100 | -3.41208100 | 0.52923900  |
| C | -0.04091000 | 2.59809300  | -2.54465900 | H | -4.06645300 | -4.86272500 | 0.64553100  |
| C | -1.97673900 | 3.77899700  | 0.11027000  | H | -1.62230300 | -4.78057400 | 1.17661600  |
| C | -2.93045400 | 3.86080500  | 1.32313200  | H | -0.81759100 | -3.24949600 | 1.52843000  |
| C | -2.27159600 | 4.98119900  | -0.80715900 | H | -2.01850500 | -3.91401800 | 2.66143000  |
| C | -0.53670500 | 3.89140100  | 0.65557800  | H | -4.39157300 | -1.67337100 | 4.88787700  |
| C | -2.88849400 | -3.06507800 | 0.82538300  | H | -5.18993600 | -1.92613600 | 3.33454600  |
| C | -2.52791200 | -3.09956900 | -0.67814800 | H | -3.87539500 | -3.00104100 | 3.85152500  |
| C | -4.19806500 | -3.84889600 | 1.04620500  | H | -1.09255100 | -0.47874000 | 3.58270100  |
| C | -1.76804100 | -3.78002600 | 1.60465000  | H | -1.96161900 | -1.06877600 | 5.01238900  |
| C | -3.18072700 | -1.01009800 | 3.22439700  | H | -1.40548500 | -2.20498000 | 3.77931300  |
| C | -4.22051900 | -1.96382900 | 3.84259300  | H | -2.96630700 | 1.16595800  | 3.01857400  |
| C | -1.82609900 | -1.20939700 | 3.93160900  | H | -4.65603900 | 0.64292500  | 3.22006800  |
| C | -3.62122100 | 0.44241200  | 3.51410600  | H | -3.55459800 | 0.62263400  | 4.59464000  |
| H | -4.44252200 | 2.13764300  | 0.10679000  | C | 1.32223300  | -1.32921500 | 2.31207700  |
| H | -4.39079000 | 2.86243300  | -1.48544300 | C | 0.89099600  | -0.80892600 | 0.96243000  |
| H | -5.12713500 | 1.76982800  | -3.34922800 | H | 0.89000800  | -2.30262100 | 2.55930800  |
| H | -6.30611000 | -0.09763700 | -4.42530200 | H | 2.41842000  | -1.42039700 | 2.27289700  |
| H | -6.70692700 | -2.20491500 | -3.12884200 | H | 1.07142900  | -0.62476700 | 3.10943100  |
| H | -5.92778700 | -2.35850200 | -0.81080200 | C | 1.15022700  | 0.60251300  | 0.70743900  |
| H | -5.38428900 | -1.21086700 | 1.18368800  | H | 1.19861000  | 1.23082900  | 1.59844100  |
| H | -4.70866200 | 0.40081700  | 1.18621700  | H | 0.51916900  | 1.07426200  | -0.10085400 |
| H | -0.87503500 | -0.01956500 | -2.37404600 | C | 1.03354500  | -1.70479700 | -0.19679600 |
| H | -2.49810500 | 0.18792000  | -3.05026400 | C | 1.39827800  | -2.99796400 | -0.16391500 |
| H | -1.07483000 | 0.58071000  | -4.02948500 | H | 1.62155600  | -3.52029600 | 0.76088300  |
| H | -3.33661600 | 2.56580800  | -3.63491000 | H | 1.52299200  | -3.56307100 | -1.08275300 |
| H | -2.35529800 | 3.98757300  | -3.25060800 | H | 0.89241800  | -1.23858200 | -1.17105500 |
| H | -1.83955100 | 2.86410500  | -4.50697000 | P | 4.51546900  | -0.01156800 | -0.13311900 |
| H | 0.35430600  | 2.47639000  | -3.56123700 | O | 4.28657100  | -0.66528800 | 1.19908700  |
| H | 0.03231200  | 3.66110300  | -2.29822000 | O | 3.41195200  | 0.88861200  | -0.70740100 |
| H | 0.62957300  | 2.04346800  | -1.88279700 | H | 2.17595600  | 0.72594400  | 0.07883800  |
| H | -2.84721300 | 2.98336400  | 1.97198700  | O | 5.93508400  | 0.82020000  | -0.14578000 |



|          |                   |                    |                    |   |             |             |             |
|----------|-------------------|--------------------|--------------------|---|-------------|-------------|-------------|
| O        | 4.85605800        | -1.08347500        | -1.31694600        | C | 1.97203200  | 1.50991300  | 0.13428300  |
| C        | 6.17313400        | 1.73431600         | 0.92697000         | C | -3.93362100 | 2.39158300  | -0.36078400 |
| H        | 6.06617200        | 1.21190900         | 1.88649500         | C | -4.16775000 | 2.41106500  | 1.16771300  |
| H        | 5.42554600        | 2.54111800         | 0.89625600         | C | -3.77091800 | 3.84026300  | -0.86843700 |
| C        | 7.57643300        | 2.30743400         | 0.76984100         | C | -5.21093200 | 1.79638400  | -0.99122300 |
| H        | 8.29614800        | 1.47756500         | 0.77123800         | C | -2.39001600 | 0.77586100  | -2.58164300 |
| H        | 7.65320600        | 2.78638500         | -0.21552500        | C | -0.98921200 | 0.22681700  | -2.93575100 |
| C        | 7.93445900        | 3.31288400         | 1.87148800         | C | -2.69968200 | 1.93556100  | -3.54857500 |
| H        | 7.84323700        | 2.82697800         | 2.85343500         | C | -3.39002200 | -0.37978500 | -2.80453200 |
| H        | 7.20257100        | 4.13347700         | 1.86920000         | C | 3.67645600  | 0.77166000  | -2.09836000 |
| C        | 9.34570300        | 3.89079400         | 1.71916200         | C | 2.66896600  | -0.19528200 | -2.76236200 |
| H        | 9.57520000        | 4.60600200         | 2.51790400         | C | 4.44749600  | -0.00649100 | -1.01319900 |
| H        | 10.10313700       | 3.09794200         | 1.75300800         | C | 4.67005600  | 1.22321000  | -3.18638800 |
| H        | 9.45783400        | 4.41269000         | 0.76073100         | C | 3.75065700  | 3.73461600  | -0.96902700 |
| C        | 5.80118700        | -2.12288200        | -1.04072400        | C | 4.91365200  | 3.39068100  | -0.02382400 |
| H        | 6.80846700        | -1.68917800        | -0.97210000        | C | 4.30051100  | 4.40334600  | -2.24960100 |
| H        | 5.56534600        | -2.58584800        | -0.07435900        | C | 2.83874100  | 4.78354400  | -0.29055100 |
| C        | 5.73343000        | -3.14661800        | -2.16742300        | H | -0.15276200 | 1.93018500  | -1.26811000 |
| H        | 5.92530500        | -2.63643300        | -3.12096400        | H | -1.16762400 | 3.33982600  | -1.16310000 |
| H        | 4.70875800        | -3.53916100        | -2.22349700        | H | -1.85069300 | 4.05221200  | 1.30266600  |
| C        | 6.72747700        | -4.29979100        | -1.98044800        | H | -0.91552700 | 4.64441300  | 3.48732900  |
| H        | 7.74770600        | -3.89536200        | -1.91671700        | H | 1.30698200  | 3.70625800  | 4.17215700  |
| H        | 6.53652100        | -4.79446800        | -1.01733900        | H | 2.56030600  | 2.30050200  | 2.57893800  |
| C        | 6.66184800        | -5.33677900        | -3.10698500        | H | 1.45210400  | 0.59856500  | -0.18011500 |
| H        | 6.88275100        | -4.87891600        | -4.07913500        | H | 2.82793500  | 1.18309500  | 0.73237900  |
| H        | 7.38226600        | -6.14795600        | -2.94856800        | H | -4.52143100 | 1.43961000  | 1.51384100  |
| <u>H</u> | <u>5.66290200</u> | <u>-5.78571600</u> | <u>-3.17380000</u> | H | -3.27485300 | 2.66041900  | 1.74293600  |

36-ts

Zero-point correction= 1.025311 (Hartree/Particle)

Thermal correction to Energy= 1.084917

Thermal correction to Enthalpy= 1.085862

Thermal correction to Gibbs Free Energy= 0.926916

E(Solv) = -2906.58650282

|   |             |             |             |   |             |             |             |
|---|-------------|-------------|-------------|---|-------------|-------------|-------------|
| P | -2.13873700 | -0.69985300 | 0.63639200  | H | -2.97064100 | 4.38395000  | -0.35971300 |
| P | -2.40055000 | 1.25794100  | -0.70421600 | H | -3.57994400 | 3.89351900  | -1.94293600 |
| P | 2.60633000  | 2.27194000  | -1.49344100 | H | -4.70309100 | 4.38729900  | -0.67437300 |
| C | -0.88978100 | 2.42027500  | -0.63599200 | H | -6.07575000 | 2.36616300  | -0.62472600 |
| C | -0.23757800 | 2.76985200  | 0.69351100  | H | -5.21950100 | 1.86657600  | -2.08166800 |
| C | -0.89531600 | 3.62948900  | 1.58865300  | H | -5.36319700 | 0.75387200  | -0.69907800 |
| C | -0.36443300 | 3.97907500  | 2.82811500  | H | -0.62674400 | -0.49720100 | -2.20171300 |
| C | 0.87468500  | 3.46570900  | 3.20449900  | H | -1.05217300 | -0.27640300 | -3.90985000 |
| C | 1.57182800  | 2.66310400  | 2.30543700  | H | -0.24323500 | 1.02029700  | -3.03742500 |
| C | 1.06495400  | 2.32379800  | 1.03648100  | H | -2.02073400 | 2.78331900  | -3.40605800 |
|   |             |             |             | H | -2.56072100 | 1.58230100  | -4.57928700 |
|   |             |             |             | H | -3.72755200 | 2.29888000  | -3.46923600 |
|   |             |             |             | H | -4.42345500 | -0.11252300 | -2.57785800 |
|   |             |             |             | H | -3.35022200 | -0.68594700 | -3.85854800 |
|   |             |             |             | H | -3.12070100 | -1.24648300 | -2.19245900 |
|   |             |             |             | H | 3.20680000  | -1.07241200 | -3.14860100 |

|   |             |             |             |
|---|-------------|-------------|-------------|
| H | 1.91312700  | -0.56281900 | -2.06221800 |
| H | 2.15410300  | 0.27936500  | -3.60470700 |
| H | 5.13126800  | 0.62968000  | -0.44310900 |
| H | 3.77673000  | -0.51161400 | -0.31204800 |
| H | 5.05259200  | -0.78904200 | -1.49268100 |
| H | 5.07255400  | 0.33781000  | -3.69735900 |
| H | 4.19403800  | 1.85380200  | -3.94600600 |
| H | 5.52230700  | 1.76852000  | -2.76939900 |
| H | 5.42986500  | 4.31056300  | 0.28690000  |
| H | 4.56854800  | 2.88869300  | 0.88697300  |
| H | 5.65839900  | 2.74860500  | -0.50488700 |
| H | 3.49403900  | 4.63924200  | -2.95350900 |
| H | 4.79381900  | 5.34768400  | -1.98086600 |
| H | 5.03639800  | 3.79000800  | -2.77249100 |
| H | 1.96339800  | 5.01645200  | -0.90816000 |
| H | 2.48473700  | 4.46403000  | 0.69063900  |
| H | 3.40477900  | 5.71548300  | -0.15354800 |
| C | -4.96348300 | -2.80672500 | 0.10000600  |
| C | -5.04505400 | -1.62978100 | 1.04596500  |
| H | -4.17038600 | -2.66546400 | -0.64277500 |
| H | -4.73190100 | -3.73551500 | 0.63734400  |
| H | -5.91150300 | -2.95691000 | -0.42551300 |
| C | -6.21894900 | -1.01120800 | 1.27047300  |
| H | -7.13151300 | -1.31676500 | 0.76497600  |
| H | -6.30735700 | -0.18727400 | 1.97411600  |
| C | -3.81851100 | -1.19805900 | 1.76247900  |
| C | -2.79908200 | -2.16907500 | 2.17401000  |
| H | -4.00768100 | -0.39395400 | 2.47415000  |
| P | 0.55417900  | -2.37996300 | 0.49999100  |
| O | 0.01758500  | -1.07475700 | -0.06203900 |
| O | -0.40761200 | -3.10205800 | 1.46849700  |
| H | -1.51972600 | -2.42664000 | 1.58809000  |
| O | 0.96423800  | -3.32548500 | -0.73426800 |
| O | 1.99065900  | -2.20036300 | 1.23424300  |
| C | 1.42428400  | -4.67520600 | -0.49674800 |
| H | 0.68519500  | -5.19959400 | 0.11988200  |
| H | 2.37137700  | -4.63308000 | 0.05433000  |
| C | 1.60453700  | -5.35766900 | -1.84457000 |
| H | 0.64544700  | -5.34378900 | -2.37884700 |
| H | 2.30976000  | -4.76966400 | -2.44639900 |
| C | 2.10790300  | -6.80081100 | -1.70536700 |
| H | 1.40204700  | -7.37692300 | -1.09057400 |
| H | 3.06203400  | -6.80442500 | -1.15960900 |
| C | 2.29219600  | -7.49777400 | -3.05762600 |

|   |             |             |             |
|---|-------------|-------------|-------------|
| H | 2.65209300  | -8.52494100 | -2.93014400 |
| H | 1.34714900  | -7.54100100 | -3.61252600 |
| H | 3.01869300  | -6.96389500 | -3.68222500 |
| C | 2.03420400  | -1.67304500 | 2.57967800  |
| H | 1.67268600  | -0.63717700 | 2.57039800  |
| H | 1.36812300  | -2.26728600 | 3.21536600  |
| C | 3.47207300  | -1.74349800 | 3.07358200  |
| H | 4.11355400  | -1.17262200 | 2.38917500  |
| H | 3.81127400  | -2.78677600 | 3.02610100  |
| C | 3.62334800  | -1.20673100 | 4.50355200  |
| H | 3.26786500  | -0.16729900 | 4.54326200  |
| H | 2.97098000  | -1.77771400 | 5.17901300  |
| C | 5.06711900  | -1.27209000 | 5.01292700  |
| H | 5.73878600  | -0.68244300 | 4.37710100  |
| H | 5.14676600  | -0.88298500 | 6.03422200  |
| H | 5.43831400  | -2.30412800 | 5.01864600  |
| H | -2.41556100 | -2.01685800 | 3.18529600  |
| H | -3.05401300 | -3.21662900 | 1.99519900  |

37-ts

Zero-point correction= 1.024445 (Hartree/Particle)

Thermal correction to Energy= 1.084477

Thermal correction to Enthalpy= 1.085422

Thermal correction to Gibbs Free Energy= 0.923955

E(Solv) = -2906.58726636

|    |             |             |             |
|----|-------------|-------------|-------------|
| Pd | 1.47773900  | 1.58210800  | 0.18616400  |
| P  | 3.40886200  | 0.25177800  | 0.03891500  |
| P  | 0.23778300  | -3.31330000 | -0.90015500 |
| C  | 3.01065500  | -1.52196800 | 0.59242600  |
| C  | 2.01222600  | -1.64788000 | 1.72783600  |
| C  | 2.49079100  | -1.75448700 | 3.04381300  |
| C  | 1.63590200  | -1.80187300 | 4.14323300  |
| C  | 0.25954300  | -1.72454900 | 3.93535800  |
| C  | -0.23219900 | -1.66792200 | 2.63312400  |
| C  | 0.61206500  | -1.67556400 | 1.50884100  |
| C  | -0.03141900 | -1.72889900 | 0.13707600  |
| C  | 4.77109500  | 0.87066500  | 1.25885400  |
| C  | 4.04186000  | 1.37864100  | 2.52479100  |
| C  | 5.79347200  | -0.20701900 | 1.67221500  |
| C  | 5.53563400  | 2.06611100  | 0.65383100  |
| C  | 4.11836100  | -0.03695000 | -1.72777400 |
| C  | 2.96082300  | -0.61766100 | -2.56959100 |
| C  | 5.30966800  | -1.01272200 | -1.76678600 |
| C  | 4.52153600  | 1.29858600  | -2.38761900 |

|   |             |             |             |   |             |             |             |
|---|-------------|-------------|-------------|---|-------------|-------------|-------------|
| C | -1.01399200 | -3.00776800 | -2.34056800 | H | -1.50440500 | -3.73161300 | 1.76394900  |
| C | -0.74925300 | -1.58760700 | -2.89007400 | H | -2.52183600 | -4.28423400 | 0.42535600  |
| C | -2.50836900 | -3.11150600 | -1.98876400 | H | 0.25146100  | -6.20061100 | -1.36032800 |
| C | -0.67266500 | -4.00412500 | -3.47170500 | H | -0.73747800 | -6.89914800 | -0.06952600 |
| C | -0.38463100 | -4.77650000 | 0.19460000  | H | -1.50170600 | -5.92226300 | -1.32450100 |
| C | -1.65079700 | -4.53214400 | 1.03588300  | H | 1.70317600  | -5.33945200 | 0.58862700  |
| C | -0.60563900 | -6.01166200 | -0.70349300 | H | 1.00810300  | -4.29496600 | 1.84049000  |
| C | 0.78835600  | -5.11049400 | 1.14686600  | H | 0.52966500  | -5.99477700 | 1.74604900  |
| H | 2.62729600  | -2.03310600 | -0.29337400 | C | 0.86036100  | 3.61290500  | -2.57934600 |
| H | 3.94695700  | -2.02137800 | 0.85857700  | C | 1.87114800  | 4.04593700  | -1.54289200 |
| H | 3.56374200  | -1.80543000 | 3.20953400  | H | 0.91001900  | 2.52594600  | -2.72748100 |
| H | 2.04291600  | -1.88677700 | 5.14712800  | H | -0.17140800 | 3.82695800  | -2.27981500 |
| H | -0.42841300 | -1.72495600 | 4.77639100  | H | 1.05555600  | 4.09843500  | -3.54043900 |
| H | -1.30479800 | -1.61609800 | 2.47122200  | C | 2.94512400  | 4.79188600  | -1.86675700 |
| H | 0.37772700  | -0.93665900 | -0.50130600 | H | 3.11844600  | 5.13013400  | -2.88475300 |
| H | -1.09481700 | -1.49615900 | 0.23544400  | H | 3.67365600  | 5.10070100  | -1.12065700 |
| H | 3.39107700  | 2.22788700  | 2.29475500  | C | 1.67185600  | 3.65913600  | -0.12990300 |
| H | 3.42688400  | 0.60948300  | 2.99714800  | C | 0.34596300  | 3.51616500  | 0.45877000  |
| H | 4.79121000  | 1.70981400  | 3.25676600  | H | 2.46844100  | 4.00023600  | 0.53187600  |
| H | 5.33725900  | -1.02067000 | 2.24206100  | P | -2.54810000 | 1.85823100  | -0.27808500 |
| H | 6.31896800  | -0.64376300 | 0.81894000  | O | -2.38961600 | 3.02892300  | -1.19192400 |
| H | 6.54969400  | 0.25334500  | 2.32152400  | O | -1.32961900 | 1.36457900  | 0.54209000  |
| H | 6.10150900  | 2.56255400  | 1.45297000  | H | -0.28145500 | 2.33514600  | 0.47566300  |
| H | 6.25730400  | 1.75501100  | -0.10628500 | O | -3.75597500 | 2.17402200  | 0.77779300  |
| H | 4.86420000  | 2.80910100  | 0.21149100  | O | -3.05632800 | 0.50805200  | -1.06134500 |
| H | 2.08817900  | 0.04379600  | -2.55343400 | C | -4.00746200 | 1.27675200  | 1.86933500  |
| H | 3.29354000  | -0.70581900 | -3.61189100 | H | -3.09916600 | 1.18023800  | 2.47638700  |
| H | 2.64387300  | -1.61364800 | -2.24771100 | H | -4.26073100 | 0.28202400  | 1.47671800  |
| H | 5.08055800  | -1.97497100 | -1.29700100 | C | -5.15932300 | 1.83694700  | 2.69383000  |
| H | 5.57344400  | -1.21628800 | -2.81305900 | H | -4.89137300 | 2.84745200  | 3.02964900  |
| H | 6.20025500  | -0.59613100 | -1.28653000 | H | -6.03960800 | 1.94599000  | 2.04627500  |
| H | 5.43476600  | 1.72201500  | -1.96684900 | C | -5.50380000 | 0.95583500  | 3.90171500  |
| H | 4.71068300  | 1.11872200  | -3.45404800 | H | -4.61497000 | 0.84649000  | 4.53948800  |
| H | 3.73092400  | 2.05031300  | -2.31096000 | H | -5.75738800 | -0.05667000 | 3.55611100  |
| H | -1.30126200 | -1.46391900 | -3.83195400 | C | -6.66260800 | 1.51322500  | 4.73536500  |
| H | -1.09190200 | -0.80501900 | -2.20792500 | H | -6.88771500 | 0.86582300  | 5.59076300  |
| H | 0.31087800  | -1.42791700 | -3.11444200 | H | -6.42555900 | 2.51101300  | 5.12434400  |
| H | -2.79971800 | -4.12475700 | -1.69702200 | H | -7.57555100 | 1.60181200  | 4.13384800  |
| H | -2.79068000 | -2.41941700 | -1.18878100 | C | -3.96631900 | 0.64986300  | -2.17185200 |
| H | -3.10833000 | -2.84730200 | -2.87162300 | H | -3.74988100 | 1.58725000  | -2.69505700 |
| H | -1.29077700 | -3.78222900 | -4.35256500 | H | -3.73671400 | -0.18314700 | -2.84544800 |
| H | 0.37827800  | -3.92096400 | -3.77080500 | C | -5.42813100 | 0.59180200  | -1.73424400 |
| H | -0.86059300 | -5.04435800 | -3.19490100 | H | -5.62775900 | 1.42243900  | -1.04633500 |
| H | -1.89390000 | -5.44335500 | 1.60151100  | H | -5.59249200 | -0.33684800 | -1.16981100 |

|   |             |             |             |
|---|-------------|-------------|-------------|
| C | -6.39423200 | 0.65480600  | -2.92513700 |
| H | -6.21397500 | 1.57954700  | -3.49100500 |
| H | -6.17920000 | -0.17314100 | -3.61636300 |
| C | -7.86640900 | 0.59568400  | -2.50346000 |
| H | -8.12018000 | 1.43107600  | -1.83967200 |
| H | -8.53356100 | 0.64445500  | -3.37185500 |
| H | -8.08701900 | -0.33408500 | -1.96447000 |
| H | 0.28220000  | 3.80886300  | 1.50837100  |
| H | -0.48356400 | 3.90186000  | -0.14283100 |

38

Zero-point correction= 0.835230 (Hartree/Particle)

Thermal correction to Energy= 0.882485

Thermal correction to Enthalpy= 0.883430

Thermal correction to Gibbs Free Energy= 0.754457

E(Solv)=-2014.87744868

|    |             |             |             |
|----|-------------|-------------|-------------|
| Pd | -2.77280400 | -0.44123900 | -0.76551600 |
| P  | -1.04554300 | 0.94961900  | 0.20187700  |
| P  | 4.13260900  | 0.13455800  | -0.55181000 |
| C  | 0.64787700  | 0.16439000  | -0.12222200 |
| C  | 1.00086900  | -1.15001400 | 0.55677900  |
| C  | 0.07213600  | -2.20373600 | 0.55485200  |
| C  | 0.34814700  | -3.43410900 | 1.14746600  |
| C  | 1.57673200  | -3.63091100 | 1.77619000  |
| C  | 2.51803800  | -2.60458800 | 1.76524000  |
| C  | 2.27455800  | -1.36847800 | 1.14049500  |
| C  | 3.39133200  | -0.33913200 | 1.14034000  |
| C  | -1.04890800 | 1.34394400  | 2.08513200  |
| C  | -1.50290700 | 0.05970200  | 2.81475000  |
| C  | 0.33012600  | 1.75045000  | 2.63946900  |
| C  | -2.07692900 | 2.44945500  | 2.39799900  |
| C  | -0.87258000 | 2.56697600  | -0.83657700 |
| C  | -0.47632900 | 2.14268200  | -2.27092200 |
| C  | 0.16648200  | 3.57885800  | -0.31960800 |
| C  | -2.25482700 | 3.24831300  | -0.93219800 |
| C  | 5.07460600  | -1.45409400 | -1.10566100 |
| C  | 3.99330500  | -2.35197600 | -1.75434600 |
| C  | 5.78747800  | -2.25423400 | -0.00068300 |
| C  | 6.09392500  | -1.09144200 | -2.20460700 |
| C  | 5.39472000  | 1.49517000  | -0.00803800 |
| C  | 6.59379500  | 1.03370900  | 0.83841700  |
| C  | 5.90065000  | 2.19738000  | -1.28844800 |
| C  | 4.60346900  | 2.55147000  | 0.79796000  |
| H  | 0.66607200  | 0.00577900  | -1.20561700 |

|   |             |             |             |
|---|-------------|-------------|-------------|
| H | 1.41509900  | 0.91500000  | 0.07099000  |
| H | -0.90390600 | -2.04421400 | 0.09677600  |
| H | -0.39858200 | -4.22327200 | 1.12759100  |
| H | 1.80475600  | -4.57328200 | 2.26692400  |
| H | 3.47530800  | -2.76023100 | 2.25634100  |
| H | 4.17843700  | -0.66858900 | 1.82759900  |
| H | 3.01735300  | 0.60934900  | 1.53791900  |
| H | -2.49728100 | -0.25668900 | 2.48997100  |
| H | -0.81444500 | -0.77350300 | 2.65406100  |
| H | -1.54306700 | 0.25979700  | 3.89428700  |
| H | 1.05218300  | 0.93389500  | 2.55043500  |
| H | 0.74441300  | 2.63671800  | 2.15237400  |
| H | 0.23237300  | 1.97941300  | 3.70925300  |
| H | -2.19012300 | 2.53131200  | 3.48705700  |
| H | -1.76577600 | 3.43110600  | 2.02956900  |
| H | -3.06383800 | 2.22044800  | 1.98168600  |
| H | -1.13175400 | 1.35097500  | -2.65454500 |
| H | -0.58140600 | 3.00828700  | -2.93774900 |
| H | 0.56191400  | 1.80466300  | -2.33949100 |
| H | 1.16393900  | 3.13843100  | -0.21427200 |
| H | 0.25306300  | 4.40472500  | -1.03856000 |
| H | -0.11920300 | 4.01725600  | 0.64111900  |
| H | -2.62020200 | 3.60743100  | 0.03275800  |
| H | -2.18082800 | 4.11758600  | -1.59961300 |
| H | -3.00136600 | 2.56309900  | -1.34479900 |
| H | 4.46374400  | -3.26417600 | -2.14694700 |
| H | 3.22343300  | -2.65772700 | -1.04051400 |
| H | 3.50009700  | -1.84243200 | -2.58947700 |
| H | 6.55688400  | -1.67141800 | 0.51226900  |
| H | 5.08516700  | -2.62898500 | 0.74808000  |
| H | 6.28088800  | -3.13045600 | -0.44457000 |
| H | 6.45752500  | -2.01305500 | -2.67891600 |
| H | 5.64705500  | -0.47170500 | -2.99055900 |
| H | 6.96793500  | -0.56644300 | -1.80682400 |
| H | 7.17565300  | 1.90671800  | 1.16707700  |
| H | 6.28107800  | 0.49423900  | 1.73954600  |
| H | 7.27331400  | 0.38828800  | 0.27400700  |
| H | 5.06637000  | 2.57360900  | -1.89097600 |
| H | 6.53049300  | 3.05469700  | -1.01365200 |
| H | 6.50136000  | 1.54065900  | -1.92173900 |
| H | 3.67832100  | 2.84821400  | 0.28807300  |
| H | 4.34774100  | 2.20719900  | 1.80490200  |
| H | 5.21738600  | 3.45463400  | 0.91226800  |
| B | -4.54097600 | -0.23422000 | 0.12659100  |

|          |                    |                    |                    |
|----------|--------------------|--------------------|--------------------|
| C        | -5.42183900        | 1.03428100         | -0.26502000        |
| C        | -6.92771200        | 1.01043200         | 0.07149500         |
| H        | -5.28754600        | 1.29856100         | -1.32124500        |
| H        | -4.96010200        | 1.86985400         | 0.29124900         |
| H        | -7.39530500        | 1.98308400         | -0.12742100        |
| H        | -7.45951400        | 0.26562800         | -0.53168700        |
| H        | -7.10730700        | 0.76897900         | 1.12566600         |
| C        | -4.92579600        | -1.21780000        | 1.32012600         |
| C        | -6.01678100        | -2.25298500        | 0.95215500         |
| H        | -5.29869000        | -0.61300300        | 2.16520300         |
| H        | -4.05237100        | -1.76548600        | 1.69320600         |
| H        | -6.25402100        | -2.89006100        | 1.81307000         |
| H        | -6.94674400        | -1.77283100        | 0.63132600         |
| H        | -5.68338900        | -2.90653800        | 0.13950100         |
| C        | -3.86057700        | -1.76770900        | -1.98066800        |
| C        | -5.09323700        | -1.35225800        | -2.79071600        |
| H        | -4.05542700        | -2.71304700        | -1.45832300        |
| H        | -3.02747700        | -1.97287600        | -2.68003000        |
| H        | -5.36436000        | -2.10794000        | -3.54472900        |
| H        | -5.97566800        | -1.21217500        | -2.15269500        |
| <u>H</u> | <u>-4.93076400</u> | <u>-0.40649300</u> | <u>-3.32230500</u> |

39-ts

Zero-point correction= 0.830785 (Hartree/Particle)

Thermal correction to Energy= 0.877146

Thermal correction to Enthalpy= 0.878091

Thermal correction to Gibbs Free Energy= 0.751576

E(Solv) = -2014.83434712

|    |             |             |             |
|----|-------------|-------------|-------------|
| Pd | -3.33339800 | 0.01388900  | 0.54823100  |
| P  | 4.77040400  | -0.51017800 | 0.38814700  |
| P  | -1.41422100 | 1.16076400  | -0.20918300 |
| C  | 3.16555700  | 0.49166000  | 0.58940700  |
| C  | 2.11702600  | -0.13991900 | 1.49462000  |
| C  | 2.53645600  | -0.55818200 | 2.77265400  |
| C  | 1.66931600  | -1.15988800 | 3.67733500  |
| C  | 0.33742900  | -1.36669700 | 3.31404100  |
| C  | -0.10329500 | -0.93851400 | 2.06683900  |
| C  | 0.75324900  | -0.30409300 | 1.14773800  |
| C  | 0.17466800  | 0.13382100  | -0.18970000 |
| C  | 4.23852000  | -1.94798300 | -0.78335400 |
| C  | 3.61397200  | -3.01424500 | 0.14840900  |
| C  | 3.21590900  | -1.59460400 | -1.87812700 |
| C  | 5.48528400  | -2.57648800 | -1.43733400 |
| C  | 5.86227900  | 0.76003500  | -0.57323300 |

|   |             |             |             |
|---|-------------|-------------|-------------|
| C | 5.90208000  | 2.05058200  | 0.27874100  |
| C | 5.41690400  | 1.12632300  | -1.99959200 |
| C | 7.30301200  | 0.20143200  | -0.60524800 |
| C | -1.51214200 | 1.62217700  | -2.08836000 |
| C | -1.27740300 | 0.33182000  | -2.90634900 |
| C | -0.49246500 | 2.66416800  | -2.58870000 |
| C | -2.93650000 | 2.14068200  | -2.38081500 |
| C | -0.95870100 | 2.74643600  | 0.81319000  |
| C | 0.45867400  | 3.28808800  | 0.52933100  |
| C | -2.00797800 | 3.84173500  | 0.53602000  |
| C | -1.01454200 | 2.41712200  | 2.32204800  |
| H | 3.49333700  | 1.42756600  | 1.05452400  |
| H | 2.76047600  | 0.76194100  | -0.38778500 |
| H | 3.57953500  | -0.42067500 | 3.04388900  |
| H | 2.03285300  | -1.47261900 | 4.65263000  |
| H | -0.35608700 | -1.84768800 | 3.99883700  |
| H | -1.14680600 | -1.07237300 | 1.79336400  |
| H | -0.08752700 | -0.75570600 | -0.77165600 |
| H | 0.91377300  | 0.68279100  | -0.77602700 |
| H | 4.32287300  | -3.33822300 | 0.91799700  |
| H | 2.71510200  | -2.64874600 | 0.65296000  |
| H | 3.33067500  | -3.89575300 | -0.44353200 |
| H | 2.26955500  | -1.24904500 | -1.45234500 |
| H | 3.58148900  | -0.82793100 | -2.56684500 |
| H | 2.99131800  | -2.49085600 | -2.47354700 |
| H | 5.20512400  | -3.52535400 | -1.91467200 |
| H | 5.91635500  | -1.93833300 | -2.21504400 |
| H | 6.26632900  | -2.79749000 | -0.70077700 |
| H | 6.09818100  | 1.83795100  | 1.33681700  |
| H | 6.71139400  | 2.69891000  | -0.08241700 |
| H | 4.97417100  | 2.62714900  | 0.21019700  |
| H | 4.38642800  | 1.49868600  | -2.02784100 |
| H | 6.06129100  | 1.92266500  | -2.39896500 |
| H | 5.49071000  | 0.27767000  | -2.68639500 |
| H | 7.39192000  | -0.70566900 | -1.20750600 |
| H | 7.97902300  | 0.95117900  | -1.03895600 |
| H | 7.66127400  | -0.02894900 | 0.40425200  |
| H | -1.56956400 | 0.51444400  | -3.94859300 |
| H | -0.22385200 | 0.03471300  | -2.91136600 |
| H | -1.86979900 | -0.50981000 | -2.54078700 |
| H | -0.66884200 | 3.66011200  | -2.17505600 |
| H | 0.54317700  | 2.37758500  | -2.37664100 |
| H | -0.58580000 | 2.74784600  | -3.67981900 |
| H | -3.04408900 | 2.31643400  | -3.45984700 |

|   |             |             |             |   |             |             |             |
|---|-------------|-------------|-------------|---|-------------|-------------|-------------|
| H | -3.69530400 | 1.41710100  | -2.07458100 | C | -0.67266600 | 2.89567400  | 0.24204700  |
| H | -3.14624900 | 3.08473000  | -1.87084300 | C | -0.45548800 | 4.10235800  | -0.44774400 |
| H | 0.63080900  | 4.16455900  | 1.16809400  | C | -1.46604100 | 4.77388000  | -1.12967500 |
| H | 1.22834900  | 2.55360900  | 0.78184900  | C | -2.75957600 | 4.25772500  | -1.10209900 |
| H | 0.60930800  | 3.60722700  | -0.50199600 | C | -3.00325900 | 3.08195900  | -0.39805400 |
| H | -3.02541800 | 3.46891000  | 0.69791900  | C | -1.98855400 | 2.36787100  | 0.26383400  |
| H | -1.84552200 | 4.67695900  | 1.22985600  | C | -2.39498800 | 1.14467600  | 1.06456400  |
| H | -1.94118800 | 4.24613600  | -0.47812600 | C | 2.64631200  | 1.73822800  | -1.00995900 |
| H | -1.99019400 | 2.02113100  | 2.61326500  | C | 1.66964900  | 1.91892400  | -2.19581400 |
| H | -0.24834500 | 1.69822900  | 2.61917100  | C | 3.29867500  | 3.08946400  | -0.66317800 |
| H | -0.84016400 | 3.34547400  | 2.88260300  | C | 3.75132700  | 0.77211100  | -1.48514600 |
| B | -3.62884600 | -1.50484300 | -0.91062000 | C | 2.68004100  | 0.71236300  | 2.01004400  |
| C | -3.01621800 | -2.97513100 | -0.94462600 | C | 1.81912200  | -0.11559000 | 2.98961300  |
| C | -1.93085700 | -3.39716200 | 0.05341000  | C | 3.09135300  | 2.01814800  | 2.72199000  |
| H | -2.66773000 | -3.17977900 | -1.97316400 | C | 3.95398900  | -0.10056800 | 1.70628400  |
| H | -3.88044700 | -3.65458000 | -0.83146800 | C | -3.07942900 | -0.79473200 | -1.17287600 |
| H | -1.65886900 | -4.45501100 | -0.06025200 | C | -2.34687900 | -0.05204100 | -2.31545900 |
| H | -1.01493700 | -2.80919900 | -0.07042800 | C | -4.51625700 | -0.24862300 | -1.07180900 |
| H | -2.26470600 | -3.25082400 | 1.08752800  | C | -3.14194100 | -2.28864300 | -1.55348400 |
| C | -4.97379400 | -1.21926300 | 1.25246400  | C | -2.63968500 | -1.68739200 | 1.82933800  |
| C | -4.87301500 | -0.09986900 | 2.13310400  | C | -4.17032400 | -1.72257400 | 1.99236600  |
| H | -4.62754500 | -2.18773200 | 1.60331500  | C | -2.11256100 | -3.12411100 | 1.62016400  |
| H | -5.80927100 | -1.25359000 | 0.55809500  | C | -2.02606200 | -1.16966000 | 3.15017600  |
| H | -5.61737200 | 0.68871700  | 2.07359300  | H | 0.10988600  | 1.92809700  | 1.98863500  |
| H | -4.45659900 | -0.24328200 | 3.12586800  | H | 1.13468800  | 3.17534400  | 1.31690800  |
| H | -3.57383300 | 1.13444800  | 1.77754300  | H | 0.53991800  | 4.53751300  | -0.43088000 |
| C | -4.68300600 | -1.17579700 | -2.08191600 | H | -1.24750800 | 5.70163400  | -1.65131500 |
| C | -5.64993600 | -2.30905800 | -2.49171300 | H | -3.57602700 | 4.77373500  | -1.59980000 |
| H | -4.08709200 | -0.90627700 | -2.97081000 | H | -4.02323600 | 2.71447200  | -0.33438300 |
| H | -5.27195400 | -0.27564900 | -1.85716000 | H | -3.46829000 | 1.20298000  | 1.27900900  |
| H | -5.11178000 | -3.19307600 | -2.85102500 | H | -1.88620500 | 1.17113300  | 2.03270700  |
| H | -6.27395800 | -2.63020900 | -1.64742300 | H | 1.22190200  | 0.96242100  | -2.48290000 |
| H | -6.32908700 | -1.98902700 | -3.29213500 | H | 0.86057300  | 2.61843300  | -1.97985700 |

40

E(Solv)=-1936.26758189

Zero-point correction= 0.779561 (Hartree/Particle)

Thermal correction to Energy= 0.822835

Thermal correction to Enthalpy= 0.823779

Thermal correction to Gibbs Free Energy= 0.706959

|    |             |             |             |
|----|-------------|-------------|-------------|
| Pd | 0.39091900  | -0.97360600 | -0.16611000 |
| P  | 1.60515800  | 0.92631000  | 0.40322900  |
| P  | -1.96807800 | -0.57679500 | 0.39039200  |
| C  | 0.48808000  | 2.33604300  | 1.04509300  |

|   |            |             |             |
|---|------------|-------------|-------------|
| H | 2.22638300 | 2.30577900  | -3.06031100 |
| H | 2.58770300 | 3.82556100  | -0.27685900 |
| H | 4.10378600 | 2.97898200  | 0.06966600  |
| H | 3.74655600 | 3.51785000  | -1.57017500 |
| H | 4.14985700 | 1.13576000  | -2.44186400 |
| H | 4.58917500 | 0.71219300  | -0.78777200 |
| H | 3.36394600 | -0.23602700 | -1.64811900 |
| H | 1.52099300 | -1.07122400 | 2.54741700  |
| H | 2.39965100 | -0.31946900 | 3.89974100  |
| H | 0.91159900 | 0.41490700  | 3.29759700  |
| H | 2.23247900 | 2.57869800  | 3.10320300  |

|   |             |             |             |
|---|-------------|-------------|-------------|
| H | 3.71769000  | 1.76589200  | 3.58852700  |
| H | 3.67692200  | 2.68432400  | 2.08312300  |
| H | 4.71731600  | 0.50424400  | 1.20940000  |
| H | 4.38819400  | -0.45265400 | 2.65168000  |
| H | 3.74618700  | -0.97749900 | 1.08746000  |
| H | -2.90545500 | -0.19083300 | -3.25168600 |
| H | -2.26809100 | 1.02237400  | -2.12909500 |
| H | -1.33519000 | -0.44611800 | -2.45849000 |
| H | -5.10617700 | -0.74154000 | -0.29626300 |
| H | -4.53709300 | 0.82682500  | -0.88433500 |
| H | -5.02998000 | -0.41599200 | -2.02854200 |
| H | -3.58004600 | -2.38252700 | -2.55627300 |
| H | -2.14682000 | -2.74484900 | -1.58045400 |
| H | -3.77177400 | -2.86730400 | -0.87077900 |
| H | -4.42561200 | -2.27819300 | 2.90546000  |
| H | -4.60483600 | -0.72145100 | 2.09093600  |
| H | -4.66440800 | -2.23061100 | 1.15945100  |
| H | -1.02044000 | -3.13984000 | 1.55114800  |
| H | -2.41241500 | -3.74688600 | 2.47426700  |
| H | -2.50874600 | -3.59278900 | 0.71660600  |
| H | -0.94363600 | -1.02937500 | 3.06884200  |
| H | -2.47773500 | -0.22991500 | 3.48406600  |
| H | -2.20499700 | -1.91033300 | 3.94065900  |
| B | 1.69996700  | -2.43411700 | -1.20474900 |
| C | 2.85001900  | -3.30106800 | -0.51927300 |
| C | 2.59475300  | -3.86310800 | 0.88696800  |
| H | 3.77266200  | -2.69511200 | -0.51465700 |
| H | 3.09269100  | -4.13765500 | -1.19886400 |
| H | 3.44658800  | -4.44271400 | 1.26705200  |
| H | 2.39218200  | -3.05948900 | 1.60472900  |
| H | 1.71856400  | -4.52393900 | 0.89123300  |
| H | 0.48769800  | -2.65286000 | -0.76964400 |
| C | 1.81341700  | -2.21177000 | -2.78843100 |
| C | 1.25171900  | -3.43750400 | -3.54997300 |
| H | 2.86242200  | -2.07090500 | -3.09279200 |
| H | 1.26599500  | -1.32325300 | -3.13102800 |
| H | 1.78488400  | -4.35817400 | -3.28284800 |
| H | 0.19067700  | -3.59668800 | -3.31934900 |
| H | 1.33815900  | -3.31144400 | -4.63674000 |

41

Zero-point correction= 0.492654 (Hartree/Particle)

Thermal correction to Energy= 0.523047

Thermal correction to Enthalpy= 0.523991

Thermal correction to Gibbs Free Energy= 0.427738

E(Solv) = -1759.16502557

|    |             |             |             |
|----|-------------|-------------|-------------|
| C  | -3.06292700 | 2.69480400  | -0.56810800 |
| O  | -1.71319100 | 3.22778000  | -0.53333200 |
| C  | -0.86104700 | 2.19956700  | -0.67633500 |
| C  | -2.87597500 | 1.20781300  | -0.96610000 |
| H  | -3.49213200 | 2.81655700  | 0.42945600  |
| H  | -3.63583700 | 3.27743700  | -1.29091900 |
| H  | -3.16662900 | 1.05130600  | -2.01118100 |
| N  | -1.39746300 | 1.04227100  | -0.89945000 |
| C  | 0.56950700  | 2.56640800  | -0.59776100 |
| C  | 0.87712100  | 3.91385200  | -0.84995700 |
| C  | 1.61492900  | 1.65918800  | -0.28483600 |
| C  | 2.19327300  | 4.36969200  | -0.81928900 |
| H  | 0.07328700  | 4.60284000  | -1.07959500 |
| C  | 2.92910400  | 2.14251700  | -0.24926500 |
| C  | 3.22232300  | 3.48197600  | -0.51833200 |
| H  | 2.40722800  | 5.41291100  | -1.02943300 |
| H  | 3.74025400  | 1.46352500  | -0.01042500 |
| H  | 4.25293000  | 3.82280600  | -0.48884400 |
| P  | 1.30012900  | -0.11683400 | 0.11714200  |
| Pd | -0.46680400 | -0.85073300 | -1.20434300 |
| C  | -3.64714600 | 0.23409600  | -0.09799600 |
| C  | -3.27765500 | 0.00058600  | 1.23441300  |
| C  | -4.77690800 | -0.41165500 | -0.61471100 |
| C  | -4.02272100 | -0.87036800 | 2.03003800  |
| H  | -2.40286500 | 0.49227100  | 1.65197600  |
| C  | -5.52677000 | -1.27882600 | 0.18326300  |
| H  | -5.07660200 | -0.23312000 | -1.64525000 |
| C  | -5.14892000 | -1.51165500 | 1.50684300  |
| H  | -3.72524000 | -1.04438600 | 3.06022500  |
| H  | -6.40367200 | -1.76940100 | -0.22904300 |
| H  | -5.73077500 | -2.18543200 | 2.12893700  |
| C  | 0.94074200  | -0.14876600 | 1.91645200  |
| C  | 1.34993600  | 0.87669600  | 2.78393900  |
| C  | 0.24967400  | -1.25593800 | 2.43817500  |
| C  | 1.07365000  | 0.79134500  | 4.14994500  |
| H  | 1.88367800  | 1.74024000  | 2.39958300  |
| C  | -0.01523500 | -1.34078000 | 3.80503600  |
| H  | -0.08120600 | -2.05053000 | 1.77500100  |
| C  | 0.39434800  | -0.31603600 | 4.66196600  |
| H  | 1.39246400  | 1.59016700  | 4.81314600  |
| H  | -0.54384300 | -2.20402100 | 4.19898400  |
| H  | 0.18347000  | -0.37985500 | 5.72547100  |

|   |                    |                    |                    |
|---|--------------------|--------------------|--------------------|
| C | 2.92200600         | -0.94377000        | -0.10288800        |
| C | 3.37587200         | -1.18571400        | -1.41203200        |
| C | 3.70843300         | -1.35178200        | 0.98414000         |
| C | 4.60056200         | -1.81500000        | -1.62692600        |
| H | 2.77299900         | -0.87630900        | -2.26274900        |
| C | 4.93077200         | -1.99209300        | 0.76240600         |
| H | 3.37291300         | -1.17400700        | 2.00068300         |
| C | 5.37848000         | -2.22255700        | -0.53861400        |
| H | 4.94540800         | -1.99285600        | -2.64140100        |
| H | 5.53146800         | -2.30822800        | 1.61019400         |
| H | 6.32897900         | -2.72023900        | -0.70674200        |
| C | -1.97680900        | -1.97716100        | -2.46311300        |
| H | -2.58351600        | -2.35455300        | -1.64260400        |
| C | -0.68423400        | -2.46124100        | -2.68619200        |
| C | 0.10348800         | -2.87966600        | -1.57796900        |
| H | -0.19726700        | -2.25700000        | -3.63837800        |
| H | -2.51398700        | -1.47976700        | -3.26511500        |
| H | 1.15323800         | -3.11284400        | -1.72862900        |
| H | <u>-0.37313300</u> | <u>-3.41261900</u> | <u>-0.75501500</u> |

42-ts

Zero-point correction= 0.677584 (Hartree/Particle)

Thermal correction to Energy= 0.716921

Thermal correction to Enthalpy= 0.717865

Thermal correction to Gibbs Free Energy= 0.598111

SCF Done: E(RB3LYP) = -2163.64578385

|   |             |             |             |
|---|-------------|-------------|-------------|
| C | -4.84360600 | -1.54162100 | -1.27620200 |
| O | -4.76902600 | -0.10192800 | -1.42753400 |
| C | -3.47828700 | 0.25593600  | -1.26115800 |
| C | -3.36181700 | -1.99756100 | -1.25488500 |
| H | -5.36414300 | -1.75191000 | -0.33775700 |
| H | -5.41827600 | -1.94071200 | -2.11341800 |
| H | -3.07770900 | -2.42652800 | -2.22305200 |
| N | -2.63158400 | -0.71082700 | -1.12530100 |
| C | -3.22843000 | 1.71395300  | -1.31443900 |
| C | -4.20645700 | 2.48159700  | -1.96922400 |
| C | -2.08927800 | 2.35738800  | -0.76060500 |
| C | -4.06716000 | 3.86039700  | -2.10981200 |
| H | -5.07755200 | 1.98368600  | -2.37785500 |
| C | -1.97771800 | 3.74586900  | -0.90714800 |
| C | -2.94766800 | 4.49435100  | -1.57902000 |
| H | -4.83079600 | 4.42963100  | -2.63077100 |
| H | -1.11679700 | 4.25633100  | -0.48989100 |
| H | -2.82374800 | 5.56876400  | -1.67892500 |

|    |             |             |             |
|----|-------------|-------------|-------------|
| P  | -0.77749800 | 1.41778900  | 0.15643100  |
| Pd | -0.47054100 | -0.62665400 | -0.98113800 |
| C  | -3.04139700 | -3.00604700 | -0.17030500 |
| C  | -3.03752800 | -2.63869400 | 1.18258200  |
| C  | -2.79010700 | -4.33984100 | -0.51282600 |
| C  | -2.78308700 | -3.58943200 | 2.17124800  |
| H  | -3.22310800 | -1.60617300 | 1.46574800  |
| C  | -2.54086000 | -5.29411300 | 0.47658400  |
| H  | -2.79441900 | -4.63648400 | -1.55953800 |
| C  | -2.53560900 | -4.91994200 | 1.82137000  |
| H  | -2.78383100 | -3.29100700 | 3.21601800  |
| H  | -2.35553000 | -6.32713200 | 0.19588600  |
| H  | -2.34624000 | -5.66085400 | 2.59297100  |
| C  | -1.46013500 | 1.28101500  | 1.86303100  |
| C  | -2.42729900 | 2.16125600  | 2.37418600  |
| C  | -0.97560700 | 0.25101000  | 2.68651600  |
| C  | -2.89319500 | 2.01606600  | 3.68281100  |
| H  | -2.81948800 | 2.96119900  | 1.75362500  |
| C  | -1.43561400 | 0.11373700  | 3.99666600  |
| H  | -0.24203600 | -0.44856400 | 2.29443300  |
| C  | -2.39694600 | 0.99554100  | 4.49639700  |
| H  | -3.64307900 | 2.70247400  | 4.06573200  |
| H  | -1.04910800 | -0.68457000 | 4.62433700  |
| H  | -2.76036100 | 0.88578700  | 5.51415600  |
| C  | 0.61748800  | 2.61131800  | 0.29866100  |
| C  | 1.51647000  | 2.69536300  | -0.77887600 |
| C  | 0.83145900  | 3.41474200  | 1.42892500  |
| C  | 2.59617300  | 3.57662700  | -0.73355300 |
| H  | 1.36433700  | 2.06924600  | -1.65513100 |
| C  | 1.92156500  | 4.28744700  | 1.47618900  |
| H  | 0.15141000  | 3.36111100  | 2.27323000  |
| C  | 2.80210300  | 4.37258500  | 0.39661500  |
| H  | 3.28018600  | 3.63705900  | -1.57542000 |
| H  | 2.07874700  | 4.90254500  | 2.35779500  |
| H  | 3.64725800  | 5.05385100  | 0.43590100  |
| C  | 0.29015000  | -2.34075300 | -1.98312800 |
| H  | 0.09821000  | -3.20719200 | -1.35001500 |
| C  | 1.37956500  | -1.46633900 | -1.68566000 |
| C  | 2.02550800  | -1.44011600 | -0.41606200 |
| H  | 1.79749200  | -0.84336400 | -2.47467200 |
| H  | -0.01781000 | -2.45988000 | -3.01940200 |
| H  | 2.59057900  | -0.55816900 | -0.13677700 |
| H  | 1.59378000  | -2.00369000 | 0.40514900  |
| C  | 4.68549100  | -2.09968400 | -1.40057700 |



|   |            |             |             |
|---|------------|-------------|-------------|
| C | 5.49646900 | -1.00069300 | -0.74458200 |
| C | 5.54421700 | -0.86582500 | 0.65164800  |
| C | 4.71759300 | -1.76719900 | 1.55038100  |
| C | 4.21295400 | -3.01630500 | 0.82701500  |
| H | 6.20934800 | -0.24797000 | -2.63482600 |
| H | 5.34850700 | -2.91618800 | -1.72697100 |
| C | 6.24745000 | -0.13659800 | -1.55318700 |
| C | 6.34739300 | 0.13855400  | 1.21000800  |
| H | 5.30696400 | -2.07967000 | 2.42007600  |
| H | 3.42690700 | -3.51456600 | 1.40303700  |
| C | 7.09451200 | 0.99213600  | 0.40301400  |
| C | 7.04482800 | 0.85419400  | -0.98737900 |
| H | 6.38743600 | 0.24464900  | 2.29174900  |
| H | 7.71658000 | 1.75940400  | 0.85460000  |
| H | 7.62490800 | 1.51456900  | -1.62521300 |
| N | 3.65519400 | -2.64427100 | -0.49317000 |
| H | 3.22373800 | -3.45726300 | -0.93234700 |
| H | 4.17613100 | -1.72766300 | -2.29666700 |
| H | 5.03218800 | -3.73637900 | 0.68673300  |
| H | 3.86214200 | -1.20592800 | 1.95161800  |

43

Zero-point correction= 0.680545 (Hartree/Particle)

Thermal correction to Energy= 0.719663

Thermal correction to Enthalpy= 0.720607

Thermal correction to Gibbs Free Energy= 0.601907

|   |             |             |             |
|---|-------------|-------------|-------------|
| C | -4.65339800 | -2.12793600 | -1.10293300 |
| O | -4.81403600 | -0.69462500 | -1.22933100 |
| C | -3.58310900 | -0.14153500 | -1.12169100 |
| C | -3.11904100 | -2.34339100 | -1.17409300 |
| H | -5.07799500 | -2.42964900 | -0.14097700 |
| H | -5.20628300 | -2.60484900 | -1.91397500 |
| H | -2.82699700 | -2.70788800 | -2.16630100 |
| N | -2.59064800 | -0.96330700 | -1.05214300 |
| C | -3.56570600 | 1.33865800  | -1.15745400 |
| C | -4.69658100 | 1.95176500  | -1.72381300 |
| C | -2.50089200 | 2.14615400  | -0.67364100 |
| C | -4.78408700 | 3.33630300  | -1.84556900 |
| H | -5.50783800 | 1.32776400  | -2.07883700 |
| C | -2.61849200 | 3.53658800  | -0.80045200 |
| C | -3.73937900 | 4.13177300  | -1.38446400 |
| H | -5.66369100 | 3.78417300  | -2.29777100 |
| H | -1.81860800 | 4.17160400  | -0.43614400 |
| H | -3.79060100 | 5.21342500  | -1.47040500 |

|    |             |             |             |
|----|-------------|-------------|-------------|
| P  | -0.99197800 | 1.41221300  | 0.12900500  |
| Pd | -0.43175300 | -0.55597200 | -1.03218300 |
| C  | -2.58401900 | -3.30725100 | -0.13411400 |
| C  | -2.54249700 | -2.95919900 | 1.22311600  |
| C  | -2.16812800 | -4.58711400 | -0.51901900 |
| C  | -2.09224400 | -3.87533900 | 2.17393800  |
| H  | -2.85130400 | -1.96612000 | 1.53753300  |
| C  | -1.72195800 | -5.50779500 | 0.43242400  |
| H  | -2.19810800 | -4.86821900 | -1.56958700 |
| C  | -1.68251400 | -5.15310600 | 1.78198400  |
| H  | -2.06787200 | -3.59216400 | 3.22281500  |
| H  | -1.41216200 | -6.50101000 | 0.11893600  |
| H  | -1.34246600 | -5.86929700 | 2.52497000  |
| C  | -1.53116400 | 1.18686900  | 1.88143000  |
| C  | -2.55458400 | 1.94172200  | 2.47701100  |
| C  | -0.87493000 | 0.21145300  | 2.65032100  |
| C  | -2.90596600 | 1.72960300  | 3.81195800  |
| H  | -3.08141600 | 2.69587400  | 1.90025500  |
| C  | -1.22103400 | 0.00653400  | 3.98673300  |
| H  | -0.09882200 | -0.39486500 | 2.19043600  |
| C  | -2.23879900 | 0.76494100  | 4.56972100  |
| H  | -3.70134800 | 2.31940100  | 4.25901600  |
| H  | -0.70258500 | -0.74969000 | 4.57022600  |
| H  | -2.51411600 | 0.60203800  | 5.60791000  |
| C  | 0.19410100  | 2.82446100  | 0.19243200  |
| C  | 0.96150000  | 3.07563500  | -0.95865200 |
| C  | 0.38504900  | 3.63130700  | 1.32408300  |
| C  | 1.88280700  | 4.12204300  | -0.98341100 |
| H  | 0.82925400  | 2.44753600  | -1.83669000 |
| C  | 1.32084300  | 4.66914200  | 1.30203200  |
| H  | -0.19474000 | 3.45332400  | 2.22425800  |
| C  | 2.06706400  | 4.91955100  | 0.14967200  |
| H  | 2.45992400  | 4.31297400  | -1.88424900 |
| H  | 1.46053700  | 5.28477900  | 2.18638700  |
| H  | 2.78948000  | 5.73081600  | 0.13381500  |
| C  | 0.67769900  | -2.03874000 | -2.06006500 |
| H  | 0.63092700  | -2.99557400 | -1.53552500 |
| C  | 1.53796100  | -0.99242300 | -1.58202500 |
| C  | 2.44861300  | -1.24378500 | -0.42169000 |
| H  | 1.90294700  | -0.25312300 | -2.29673800 |
| H  | 0.43290900  | -2.09749300 | -3.11898700 |
| H  | 2.86333500  | -0.33542200 | 0.01814600  |
| H  | 1.96620900  | -1.84373000 | 0.35312200  |
| C  | 4.70453100  | -1.33643100 | -1.64705300 |

|   |            |             |             |
|---|------------|-------------|-------------|
| C | 5.58001300 | -0.48574900 | -0.75363000 |
| C | 5.74302000 | -0.77798200 | 0.60918400  |
| C | 4.95548100 | -1.89551400 | 1.26742500  |
| C | 4.34345200 | -2.86432300 | 0.26045300  |
| H | 6.14643100 | 0.80727800  | -2.38476100 |
| H | 5.29493800 | -2.07748100 | -2.19943900 |
| C | 6.27917800 | 0.58384000  | -1.32865500 |
| C | 6.61200700 | 0.01206400  | 1.37321600  |
| H | 5.59959600 | -2.47461900 | 1.93890700  |
| H | 3.58686400 | -3.50701100 | 0.71730600  |
| C | 7.31262800 | 1.06822000  | 0.79676500  |
| C | 7.14576900 | 1.35644800  | -0.56078400 |
| H | 6.73880400 | -0.20811600 | 2.43046600  |
| H | 7.98642500 | 1.66586600  | 1.40322300  |
| H | 7.68521900 | 2.18094100  | -1.01666800 |
| N | 3.67712800 | -2.11098100 | -0.86382800 |
| H | 3.25743700 | -2.79255300 | -1.50620200 |
| H | 4.16103900 | -0.73421500 | -2.37870400 |
| H | 5.10850000 | -3.49814800 | -0.19898500 |
| H | 4.16424900 | -1.47278500 | 1.90087200  |

44

Zero-point correction= 0.259826 (Hartree/Particle)  
Thermal correction to Energy= 0.271248  
Thermal correction to Enthalpy= 0.272192  
Thermal correction to Gibbs Free Energy= 0.222073  
E(Solv) = -521.702205814

|   |             |             |             |
|---|-------------|-------------|-------------|
| C | -4.03361600 | -1.30416800 | -0.71079400 |
| C | -3.46397800 | -0.12005300 | -0.47322600 |
| H | -4.00080300 | -2.11811500 | 0.01034900  |
| H | -3.55211000 | 0.68076900  | -1.20458600 |
| C | -2.77348000 | 0.20556300  | 0.81679700  |
| H | -2.88216700 | -0.60317900 | 1.54425500  |
| C | -0.51628300 | -0.81282900 | 0.25325300  |
| C | 0.96748100  | -0.55381600 | 0.11146200  |
| C | 1.47390200  | 0.73893300  | -0.09134300 |
| C | 0.55689600  | 1.94858400  | -0.08386100 |
| C | -0.91181600 | 1.57953200  | -0.26272000 |
| H | 1.44018500  | -2.65118400 | 0.31018500  |
| H | -0.72206400 | -1.57265400 | 1.01318900  |
| C | 1.83749300  | -1.65181400 | 0.14879000  |
| C | 2.85482800  | 0.90805300  | -0.25547300 |
| H | 0.67989900  | 2.51466900  | 0.85135100  |
| H | -1.12648500 | 1.22765500  | -1.27422200 |

|   |             |             |             |
|---|-------------|-------------|-------------|
| C | 3.71663400  | -0.18525600 | -0.22641200 |
| C | 3.20675500  | -1.47095600 | -0.02367300 |
| H | 3.25415200  | 1.90755300  | -0.40822600 |
| H | 4.78360800  | -0.03620900 | -0.35999000 |
| H | 3.87354800  | -2.32693000 | 0.00518300  |
| N | -1.26429600 | 0.43450400  | 0.66638200  |
| H | -0.98260900 | -1.13987300 | -0.68148200 |
| H | -1.57756300 | 2.41354200  | -0.02678700 |
| H | 0.82638400  | 2.64275900  | -0.88785700 |
| H | -4.57581300 | -1.49507400 | -1.63195100 |
| H | -3.15817900 | 1.12980300  | 1.26117300  |
| H | -0.91880900 | 0.69431200  | 1.59793900  |

45-ts

Zero-point correction= 0.843033 (Hartree/Particle)  
Thermal correction to Energy= 0.892898  
Thermal correction to Enthalpy= 0.893842  
Thermal correction to Gibbs Free Energy= 0.747414  
E(Solv) = -2550.86641313

|    |            |             |             |
|----|------------|-------------|-------------|
| C  | 4.50694600 | 3.51732300  | 1.52988000  |
| O  | 5.27821800 | 2.79211100  | 0.54099200  |
| C  | 4.47317700 | 1.84453300  | 0.01104200  |
| C  | 3.06365900 | 2.96783200  | 1.36598400  |
| H  | 4.93502600 | 3.29966600  | 2.51206300  |
| H  | 4.59991900 | 4.58354400  | 1.31526300  |
| H  | 2.42423100 | 3.70471000  | 0.86683800  |
| N  | 3.24825100 | 1.84292400  | 0.41870200  |
| C  | 5.12585200 | 0.97854900  | -0.99790000 |
| C  | 6.30510600 | 1.48692600  | -1.56993900 |
| C  | 4.64376600 | -0.29393900 | -1.40864100 |
| C  | 6.99974100 | 0.77890800  | -2.54737500 |
| H  | 6.67021000 | 2.45328100  | -1.24428300 |
| C  | 5.36698900 | -0.98957400 | -2.38694700 |
| C  | 6.52804500 | -0.46415900 | -2.95861300 |
| H  | 7.90202600 | 1.20005000  | -2.98012100 |
| H  | 5.01748900 | -1.96326000 | -2.71181900 |
| H  | 7.05788900 | -1.03155800 | -3.71835400 |
| P  | 3.11072000 | -1.05525600 | -0.68934800 |
| Pd | 1.54788900 | 0.66723000  | -0.30220300 |
| C  | 2.41097600 | 2.56982300  | 2.67560600  |
| C  | 2.74734100 | 1.37403800  | 3.32440600  |
| C  | 1.49572700 | 3.43807200  | 3.28336400  |
| C  | 2.17376400 | 1.05331200  | 4.55532700  |
| H  | 3.44890600 | 0.68558200  | 2.86215000  |

|   |             |             |             |                                          |                |                    |             |
|---|-------------|-------------|-------------|------------------------------------------|----------------|--------------------|-------------|
| C | 0.92637800  | 3.12124300  | 4.51883000  | H                                        | 0.58699100     | 4.75408600         | -3.88280200 |
| H | 1.22952700  | 4.36919800  | 2.78811800  | H                                        | 0.10693000     | 6.79249000         | -2.53800200 |
| C | 1.26335500  | 1.92620100  | 5.15696100  | H                                        | -1.18519500    | -2.57973900        | -0.14529700 |
| H | 2.44224000  | 0.12123800  | 5.04505700  | H                                        | -1.11999700    | -1.86299300        | -1.82176100 |
| H | 0.22252800  | 3.80783600  | 4.98117900  | C                                        | -6.48350200    | 1.03688500         | -0.61098500 |
| H | 0.82287700  | 1.67816400  | 6.11862100  | C                                        | -5.96854100    | -0.01664400        | -1.26894200 |
| C | 3.71919200  | -1.91037000 | 0.82649600  | H                                        | -5.83622584    | 1.70935200         | -0.08780079 |
| C | 5.06414400  | -2.25673000 | 1.03061100  | H                                        | -6.61917900    | -0.69109300        | -1.82354800 |
| C | 2.77636800  | -2.22899800 | 1.81882700  | C                                        | -4.49144400    | -0.29179600        | -1.36550900 |
| C | 5.45514500  | -2.91122800 | 2.20111400  | H                                        | -3.95935761    | 0.54067852         | -0.95469243 |
| H | 5.80950200  | -2.01742800 | 0.27832700  | C                                        | -4.30725200    | -1.42578800        | 0.83884500  |
| C | 3.16793600  | -2.89224700 | 2.98214500  | C                                        | -3.99186500    | -2.68843100        | 1.61463300  |
| H | 1.73530700  | -1.95016800 | 1.67825000  | C                                        | -3.88028300    | -3.93398800        | 0.98156500  |
| C | 4.50912400  | -3.23218400 | 3.17644000  | C                                        | -3.99899300    | -4.03662300        | -0.52418200 |
| H | 6.49966300  | -3.17134700 | 2.34824100  | C                                        | -4.67880700    | -2.81550700        | -1.14327300 |
| H | 2.42759900  | -3.13714000 | 3.73888700  | H                                        | -3.94117200    | -1.63326400        | 3.49498700  |
| H | 4.81606400  | -3.74226600 | 4.08516100  | H                                        | -3.67807000    | -0.59829200        | 1.18762100  |
| C | 2.70090300  | -2.41661500 | -1.86048000 | C                                        | -3.85096000    | -2.60143300        | 3.00671700  |
| C | 1.96396700  | -2.08474100 | -3.01059700 | C                                        | -3.62870800    | -5.07392100        | 1.75752400  |
| C | 3.06258200  | -3.75520700 | -1.64725600 | H                                        | -3.00363600    | -4.16434600        | -0.97051800 |
| C | 1.61771400  | -3.06636200 | -3.93857500 | H                                        | -5.74915600    | -2.80607300        | -0.90550100 |
| H | 1.66596300  | -1.05194800 | -3.17632900 | C                                        | -3.49202000    | -4.98377100        | 3.14001300  |
| C | 2.70130900  | -4.73906800 | -2.57140300 | C                                        | -3.60408200    | -3.73993500        | 3.76873500  |
| H | 3.62744400  | -4.03252500 | -0.76277400 | H                                        | -3.54336200    | -6.04085300        | 1.26692000  |
| C | 1.98407900  | -4.39720100 | -3.71890300 | H                                        | -3.30282200    | -5.87814600        | 3.72644700  |
| H | 1.05866100  | -2.79454600 | -4.82993300 | H                                        | -3.50028700    | -3.65932700        | 4.84681700  |
| H | 2.98714300  | -5.77231600 | -2.39479000 | N                                        | -4.06880500    | -1.55711600        | -0.62481500 |
| H | 1.70985500  | -5.16370800 | -4.43832400 | H                                        | -5.35074000    | -1.12316100        | 0.99013100  |
| C | -0.19758300 | 1.92985700  | -0.23252300 | H                                        | -4.57007400    | -2.82969600        | -2.22899000 |
| C | -0.53021600 | 0.71411400  | -0.91447600 | H                                        | -4.57418500    | -4.92758400        | -0.80233700 |
| H | -0.46477800 | 1.98197800  | 0.82463300  | H                                        | -2.78415493    | -1.60580338        | -0.72538329 |
| H | -0.64859300 | 0.71119000  | -1.99727100 | H                                        | -7.54056408    | 1.20277537         | -0.61059264 |
| C | -0.84131300 | -0.48077600 | -0.21185900 | H                                        | -4.22770819    | -0.39354298        | -2.39749300 |
| C | -1.31643800 | -1.68847300 | -0.76126400 |                                          |                |                    |             |
| H | -0.82605500 | -0.40742400 | 0.87778400  | 46                                       |                |                    |             |
| C | -0.10912600 | 3.24764600  | -0.89426100 | Zero-point correction=                   | 0.244126       | (Hartree/Particle) |             |
| C | -0.37488800 | 4.41312000  | -0.15008800 | Thermal correction to Energy=            | 0.255547       |                    |             |
| C | 0.24107700  | 3.40006700  | -2.25094900 | Thermal correction to Enthalpy=          | 0.256491       |                    |             |
| C | -0.29688500 | 5.67780100  | -0.73354600 | Thermal correction to Gibbs Free Energy= | 0.206354       |                    |             |
| H | -0.65761900 | 4.31812300  | 0.89612400  | E(Solv) =                                | -521.239340703 |                    |             |
| C | 0.31453900  | 4.66273600  | -2.83469300 | C                                        | -4.16303100    | -1.29354500        | -0.55062800 |
| H | 0.47578300  | 2.52263800  | -2.84769100 | C                                        | -3.46541700    | -0.15935300        | -0.47161100 |
| C | 0.04728200  | 5.80933700  | -2.08022400 | H                                        | -4.23170900    | -1.97932300        | 0.29251400  |
| H | -0.51263900 | 6.56055800  | -0.13739600 | H                                        | -3.42467600    | 0.50022300         | -1.33936700 |

|          |                    |                   |                   |
|----------|--------------------|-------------------|-------------------|
| C        | -2.70844300        | 0.29895500        | 0.75767200        |
| H        | -2.86694400        | -0.42512700       | 1.56793300        |
| C        | -0.55564500        | -0.74805200       | 0.28174800        |
| C        | 0.94029000         | -0.54228600       | 0.13263200        |
| C        | 1.48412300         | 0.74073400        | -0.03357000       |
| C        | 0.58029100         | 1.95633900        | -0.01095400       |
| C        | -0.87733700        | 1.58024300        | -0.28808700       |
| H        | 1.36444800         | -2.64998900       | 0.25064500        |
| H        | -0.74758100        | -1.46890900       | 1.08831800        |
| C        | 1.79022100         | -1.65632100       | 0.12281300        |
| C        | 2.86861800         | 0.87801900        | -0.20534200       |
| H        | 0.63432300         | 2.43493500        | 0.97658700        |
| H        | -0.99673300        | 1.32223700        | -1.35869200       |
| C        | 3.70857300         | -0.23307900       | -0.21090200       |
| C        | 3.16504900         | -1.51006700       | -0.04556800       |
| H        | 3.28803200         | 1.87363800        | -0.33716700       |
| H        | 4.77948200         | -0.10584700       | -0.34591400       |
| H        | 3.80935600         | -2.38531800       | -0.04694400       |
| N        | -1.26325700        | 0.48794800        | 0.60135100        |
| H        | -0.94300200        | -1.21730000       | -0.64497800       |
| H        | -1.52943800        | 2.43859900        | -0.08825900       |
| H        | 0.92372100         | 2.69801500        | -0.74388000       |
| H        | -4.70043200        | -1.57970300       | -1.45130000       |
| <u>H</u> | <u>-3.11980600</u> | <u>1.25870900</u> | <u>1.10182800</u> |

47-ts

Zero-point correction=0.783267 (Hartree/Particle)

Thermal correction to Energy= 0.828328

Thermal correction to Enthalpy=0.829273

Thermal correction to Gibbs Free Energy= 0.699822

E(Solv)= -2434.11589350

|   |             |            |            |
|---|-------------|------------|------------|
| C | -3.96346400 | 1.38038500 | 2.07438400 |
| O | -2.78209000 | 1.84264300 | 2.77357200 |
| C | -1.71355400 | 1.31772700 | 2.13494200 |
| C | -3.41895200 | 0.31289000 | 1.08069200 |
| H | -4.65877700 | 0.97886300 | 2.81304700 |
| H | -4.41063500 | 2.24332500 | 1.57364000 |
| H | -3.72689100 | 0.54839200 | 0.05737700 |
| N | -1.94763800 | 0.48600500 | 1.17753700 |
| C | -0.40554800 | 1.75373000 | 2.67705800 |
| C | -0.35155600 | 2.00898000 | 4.05590000 |
| C | 0.75342800  | 1.93929300 | 1.88131000 |
| C | 0.83810900  | 2.40296300 | 4.66562000 |
| H | -1.25231200 | 1.89197400 | 4.64809800 |

|    |             |             |             |
|----|-------------|-------------|-------------|
| C  | 1.93410500  | 2.35014800  | 2.51251800  |
| C  | 1.98353000  | 2.57065000  | 3.89145900  |
| H  | 0.86301000  | 2.58380000  | 5.73584500  |
| H  | 2.82811300  | 2.50938800  | 1.92010100  |
| H  | 2.91580700  | 2.88606100  | 4.35093800  |
| P  | 0.71677500  | 1.63959100  | 0.05325100  |
| Pd | -0.29169400 | -0.47175600 | -0.30282700 |
| C  | -3.87523600 | -1.09753200 | 1.41752400  |
| C  | -3.34930000 | -1.78950000 | 2.51706300  |
| C  | -4.90131900 | -1.69385900 | 0.67291900  |
| C  | -3.83508300 | -3.05268400 | 2.85837600  |
| H  | -2.55640000 | -1.34012100 | 3.10915100  |
| C  | -5.38792700 | -2.95916500 | 1.01107600  |
| H  | -5.33436800 | -1.15823200 | -0.16918200 |
| C  | -4.85362600 | -3.64269100 | 2.10466000  |
| H  | -3.42217000 | -3.57500300 | 3.71711100  |
| H  | -6.18600500 | -3.40562900 | 0.42468500  |
| H  | -5.23321900 | -4.62422300 | 2.37348100  |
| C  | 2.38851500  | 2.12384900  | -0.53965700 |
| C  | 2.67037400  | 3.41932800  | -1.00332500 |
| C  | 3.41408400  | 1.16490400  | -0.52821800 |
| C  | 3.95432900  | 3.74612200  | -1.44262400 |
| H  | 1.89079800  | 4.17323400  | -1.02737200 |
| C  | 4.70005700  | 1.50023400  | -0.95362000 |
| H  | 3.21248200  | 0.15545300  | -0.18144900 |
| C  | 4.97122100  | 2.79018000  | -1.41518400 |
| H  | 4.15801500  | 4.74996600  | -1.80441200 |
| H  | 5.48303300  | 0.74889000  | -0.92715000 |
| H  | 5.97013200  | 3.04840200  | -1.75526800 |
| C  | -0.39868100 | 2.96490000  | -0.57834300 |
| C  | -0.60450700 | 4.16965600  | 0.11359300  |
| C  | -1.04716500 | 2.76411100  | -1.80734600 |
| C  | -1.44230500 | 5.15276700  | -0.41716400 |
| H  | -0.11206900 | 4.34562100  | 1.06527200  |
| C  | -1.88009500 | 3.75098300  | -2.33664000 |
| H  | -0.90699300 | 1.83383000  | -2.35053300 |
| C  | -2.08076000 | 4.94571300  | -1.64202900 |
| H  | -1.59283900 | 6.08110200  | 0.12667300  |
| H  | -2.37586100 | 3.57979300  | -3.28789200 |
| H  | -2.73183200 | 5.71244600  | -2.05228600 |
| C  | -0.74179200 | -1.77591000 | -2.07613000 |
| C  | -0.97722000 | -2.50552900 | -0.90952200 |
| H  | 0.21699700  | -1.87247600 | -2.57580300 |
| H  | -2.00131100 | -2.65629000 | -0.57744300 |

|   |             |             |             |
|---|-------------|-------------|-------------|
| C | 0.01712400  | -3.49495100 | -0.30017100 |
| C | -0.43083200 | -3.86125800 | 1.12041600  |
| H | 0.00569900  | -4.42268600 | -0.89245400 |
| H | 0.19476300  | -4.63570400 | 1.57052000  |
| H | -0.45398600 | -2.98686700 | 1.77748400  |
| C | -1.75458500 | -1.09582300 | -2.90956600 |
| C | -1.32101700 | -0.40938200 | -4.06018800 |
| C | -3.13461200 | -1.13000300 | -2.63454100 |
| C | -2.22934900 | 0.23240500  | -4.90007000 |
| H | -0.25911200 | -0.38446400 | -4.29489400 |
| C | -4.04180100 | -0.48768700 | -3.47444600 |
| H | -3.50310000 | -1.67622000 | -1.77240300 |
| C | -3.59506300 | 0.19898500  | -4.60758500 |
| H | -1.87276200 | 0.74893800  | -5.78664900 |
| H | -5.10501200 | -0.53544900 | -3.25487500 |
| H | -4.30723400 | 0.68961500  | -5.26463500 |
| H | -1.45095000 | -4.25316700 | 1.06827100  |
| C | 2.27437600  | -3.12691100 | 0.79749600  |
| C | 3.70525500  | -2.66078200 | 0.59954000  |
| C | 4.25697400  | -2.48694100 | -0.67764600 |
| C | 3.38327300  | -2.65326700 | -1.90151600 |
| C | 2.13975900  | -3.48009900 | -1.59150400 |
| H | 4.07935200  | -2.61399800 | 2.72312900  |
| H | 1.81849300  | -2.58195400 | 1.62754100  |
| C | 4.50945100  | -2.47584100 | 1.73320900  |
| C | 5.61199600  | -2.14653000 | -0.79645300 |
| H | 3.08100900  | -1.66747100 | -2.28325500 |
| H | 2.42011300  | -4.52622500 | -1.38783400 |
| C | 6.40913000  | -1.97257900 | 0.33302500  |
| C | 5.85288900  | -2.13281200 | 1.60579900  |
| H | 6.04331000  | -2.02790900 | -1.78800900 |
| H | 7.45988500  | -1.72008900 | 0.22322600  |
| H | 6.46523000  | -1.99759300 | 2.49243500  |
| N | 1.42595000  | -2.94248500 | -0.40252800 |
| H | 1.04109200  | -1.43682500 | -0.50052700 |
| H | 2.28782700  | -4.19238500 | 1.07404300  |
| H | 1.45639600  | -3.48998000 | -2.44175100 |
| H | 3.94133000  | -3.14202900 | -2.70886000 |

48-ts

Zero-point correction= 0.596390 (Hartree/Particle)

Thermal correction to Energy= 0.632628

Thermal correction to Enthalpy= 0.633572

Thermal correction to Gibbs Free Energy=0.519804

E(Solv)= -2046.37642331

|    |             |             |             |
|----|-------------|-------------|-------------|
| C  | 1.21412100  | 4.33335400  | -0.04732000 |
| O  | 2.18647500  | 3.56368200  | 0.69840400  |
| C  | 1.69578500  | 2.29469700  | 0.77998600  |
| C  | 0.16333500  | 3.28034600  | -0.51447200 |
| H  | 0.78618800  | 5.08443600  | 0.62329300  |
| H  | 1.73504900  | 4.83066700  | -0.86864500 |
| H  | 0.24591500  | 3.10614400  | -1.59428500 |
| N  | 0.59566000  | 2.04657900  | 0.17039100  |
| C  | 2.49522200  | 1.37426200  | 1.62158400  |
| C  | 3.18075800  | 1.95465500  | 2.69994000  |
| C  | 2.57919500  | -0.02604700 | 1.40171100  |
| C  | 3.91264900  | 1.17431100  | 3.59236100  |
| H  | 3.12313300  | 3.02870500  | 2.83678800  |
| C  | 3.32421100  | -0.78764700 | 2.31241400  |
| C  | 3.97669900  | -0.20314300 | 3.40063200  |
| H  | 4.42462400  | 1.64222500  | 4.42827200  |
| H  | 3.40291300  | -1.85914200 | 2.16783400  |
| H  | 4.54024900  | -0.82887400 | 4.08754500  |
| P  | 1.71554400  | -0.83716400 | -0.03776400 |
| Pd | -0.45055500 | -0.17303400 | -0.19363400 |
| C  | -1.26499700 | 3.68588600  | -0.20320100 |
| C  | -1.77908400 | 3.58638900  | 1.09565400  |
| C  | -2.06909400 | 4.23005700  | -1.21026300 |
| C  | -3.07270000 | 4.02365100  | 1.37926600  |
| H  | -1.17181000 | 3.14386800  | 1.88044400  |
| C  | -3.36299500 | 4.67286000  | -0.92796400 |
| H  | -1.68314700 | 4.30282500  | -2.22503800 |
| C  | -3.86788200 | 4.57101800  | 0.36895700  |
| H  | -3.46287700 | 3.93197100  | 2.38953800  |
| H  | -3.97634000 | 5.09026400  | -1.72214100 |
| H  | -4.87633000 | 4.90968600  | 0.59084000  |
| C  | 2.10934200  | -2.63145700 | 0.17209700  |
| C  | 3.33288100  | -3.20652900 | -0.20791000 |
| C  | 1.11538800  | -3.45379800 | 0.72505400  |
| C  | 3.55844500  | -4.57234300 | -0.02833700 |
| H  | 4.10856400  | -2.59058700 | -0.65327800 |
| C  | 1.34641400  | -4.81756400 | 0.91334400  |
| H  | 0.15473000  | -3.01783900 | 0.98672000  |
| C  | 2.56764100  | -5.37937400 | 0.53607300  |
| H  | 4.50732600  | -5.00619700 | -0.33317600 |
| H  | 0.56641300  | -5.44169500 | 1.34119400  |
| H  | 2.74414300  | -6.44319100 | 0.67191800  |
| C  | 2.78159400  | -0.33403200 | -1.46639400 |

|          |                    |                    |                    |    |             |             |             |
|----------|--------------------|--------------------|--------------------|----|-------------|-------------|-------------|
| C        | 4.10942600         | 0.10106200         | -1.33360700        | H  | -1.70758200 | -2.09658300 | 1.92520100  |
| C        | 2.21721900         | -0.40072500        | -2.75142800        | N  | -0.32672000 | -1.87060600 | 0.36333600  |
| C        | 4.85606100         | 0.45594700         | -2.46004000        | C  | 1.81745400  | -2.42199700 | -0.79253500 |
| H        | 4.56438300         | 0.16795700         | -0.34966300        | C  | 2.32525400  | -3.55349200 | -1.45604800 |
| C        | 2.96700300         | -0.05465400        | -3.87595100        | C  | 2.39696400  | -1.15053200 | -1.03875000 |
| H        | 1.18283600         | -0.71688200        | -2.86021700        | C  | 3.35724500  | -3.44466700 | -2.38371200 |
| C        | 4.28813300         | 0.37637900         | -3.73266000        | H  | 1.88552900  | -4.52152800 | -1.24719700 |
| H        | 5.88219600         | 0.79413800         | -2.34061500        | C  | 3.43042700  | -1.06785600 | -1.98331900 |
| H        | 2.51615200         | -0.11354400        | -4.86317500        | C  | 3.90547900  | -2.19393100 | -2.65715800 |
| H        | 4.87014000         | 0.65319300         | -4.60778300        | H  | 3.72200400  | -4.33234000 | -2.89237200 |
| C        | -3.44761700        | -0.27015100        | 0.67879000         | H  | 3.87711600  | -0.10232800 | -2.19395300 |
| C        | -4.36007300        | -1.48338200        | 0.52742400         | H  | 4.70549300  | -2.08911000 | -3.38488900 |
| C        | -4.53937500        | -2.09313900        | -0.72647700        | P  | 1.86628600  | 0.36500400  | -0.10197600 |
| C        | -3.78494400        | -1.58248200        | -1.94020100        | Pd | -0.34838400 | 0.36463900  | 0.48048700  |
| C        | -3.21760700        | -0.17115200        | -1.70829900        | C  | -2.58397400 | -2.91447700 | 0.16143200  |
| H        | -4.92102900        | -1.49854300        | 2.60515200         | C  | -2.44334700 | -3.31038900 | -1.17493900 |
| H        | -2.86537500        | -0.36273900        | 1.60200800         | C  | -3.87012600 | -2.82253700 | 0.70627200  |
| C        | -5.06002400        | -1.97693100        | 1.63637500         | C  | -3.56612000 | -3.61150500 | -1.94809100 |
| C        | -5.41564500        | -3.18248300        | -0.83421300        | H  | -1.45482000 | -3.37552600 | -1.62161000 |
| H        | -2.94873400        | -2.26229600        | -2.16334200        | C  | -4.99361800 | -3.12843700 | -0.06275800 |
| H        | -4.04775700        | 0.55890400         | -1.74243200        | H  | -3.98976800 | -2.48993500 | 1.73389000  |
| C        | -6.10509300        | -3.66994700        | 0.27434700         | C  | -4.84459600 | -3.52439200 | -1.39355100 |
| C        | -5.92493600        | -3.06344000        | 1.52058600         | H  | -3.44096100 | -3.91209700 | -2.98512600 |
| H        | -5.55672200        | -3.65103800        | -1.80688700        | H  | -5.98509800 | -3.04698800 | 0.37474300  |
| H        | -6.77992200        | -4.51570700        | 0.16784000         | H  | -5.71862600 | -3.75655400 | -1.99615200 |
| H        | -6.45367500        | -3.43640200        | 2.39444200         | C  | 2.46692400  | 1.76274500  | -1.14232300 |
| N        | -2.54034800        | -0.02505700        | -0.42986000        | C  | 3.76800900  | 2.28226900  | -1.05796300 |
| H        | -1.55690100        | -1.29434800        | -0.42128300        | C  | 1.55814600  | 2.33822300  | -2.04464500 |
| H        | -4.08758600        | 0.62460000         | 0.81450900         | C  | 4.15636000  | 3.34691300  | -1.87403600 |
| H        | -2.52978200        | 0.09499800         | -2.51753900        | H  | 4.47598300  | 1.86387600  | -0.34837700 |
| <u>H</u> | <u>-4.44031200</u> | <u>-1.59536000</u> | <u>-2.82329300</u> | C  | 1.95187900  | 3.39619200  | -2.86453200 |

49

Zero-point correction= 0.599046 (Hartree/Particle)

Thermal correction to Energy= 0.634786

Thermal correction to Enthalpy= 0.635730

Thermal correction to Gibbs Free Energy= 0.525400

E(Solv)=-2046.40272

|   |             |             |            |   |            |             |            |
|---|-------------|-------------|------------|---|------------|-------------|------------|
| C | -0.61481500 | -3.95377100 | 1.42394500 | C | 2.63324000 | 1.16381800  | 2.45654200 |
| O | 0.54399800  | -3.93817900 | 0.54962000 | C | 4.99017800 | -0.32696400 | 2.56726200 |
| C | 0.64481500  | -2.66659100 | 0.08062800 | H | 4.48242700 | -1.01200500 | 0.59478000 |
| C | -1.37735500 | -2.66002700 | 1.05140300 | C | 3.44538300 | 1.22365600  | 3.58875000 |
| H | -1.17098000 | -4.87137000 | 1.22853900 | H | 1.70505300 | 1.72700000  | 2.41978600 |
| H | -0.24951600 | -3.94988800 | 2.45670400 | C | 4.62478300 | 0.47706900  | 3.64780400 |

|          |                    |                   |                   |
|----------|--------------------|-------------------|-------------------|
| H        | 5.90383600         | -0.91425500       | 2.60813500        |
| H        | 3.15049700         | 1.84619000        | 4.42922900        |
| H        | 5.25257900         | 0.51764600        | 4.53393700        |
| C        | -3.28595700        | 0.61950100        | 0.12236200        |
| C        | -3.56710300        | 2.08889700        | -0.17114100       |
| C        | -3.28540000        | 3.06751800        | 0.79764600        |
| C        | -2.63241900        | 2.67593000        | 2.10964800        |
| C        | -2.63174100        | 1.14970200        | 2.33166400        |
| H        | -4.36492500        | 1.71158900        | -2.13322300       |
| H        | -2.99468300        | 0.10886200        | -0.80318300       |
| C        | -4.14727600        | 2.47440700        | -1.38638200       |
| C        | -3.59491300        | 4.40652600        | 0.52267900        |
| H        | -1.59296400        | 3.03317300        | 2.10942800        |
| H        | -3.64858300        | 0.85772800        | 2.66496100        |
| C        | -4.17258600        | 4.78278300        | -0.68920700       |
| C        | -4.44944300        | 3.80936400        | -1.65281100       |
| H        | -3.37764100        | 5.16359400        | 1.27486600        |
| H        | -4.40558800        | 5.82749700        | -0.88098800       |
| H        | -4.89590100        | 4.08957600        | -2.60415700       |
| N        | -2.29806100        | 0.35028800        | 1.16067300        |
| H        | -0.34108500        | 1.91110400        | 0.62624300        |
| H        | -4.24882400        | 0.15537800        | 0.42473300        |
| H        | -1.94809900        | 0.90158200        | 3.15333200        |
| <u>H</u> | <u>-3.13863700</u> | <u>3.17959400</u> | <u>2.94692600</u> |

50-ts

Zero-point correction= 0.766073 (Hartree/Particle)

Thermal correction to Energy= 0.812246

Thermal correction to Enthalpy= 0.813190

Thermal correction to Gibbs Free Energy= 0.675025

E(Solv)=-2433.5813

|   |             |            |             |
|---|-------------|------------|-------------|
| C | -1.84096600 | 4.34138700 | 0.06624200  |
| O | -2.99312100 | 3.65943200 | -0.47934900 |
| C | -2.66570700 | 2.34378100 | -0.58371100 |
| C | -0.70191900 | 3.29619300 | -0.05462300 |
| H | -1.67581800 | 5.24813000 | -0.51766500 |
| H | -2.06776000 | 4.60264900 | 1.10509000  |
| H | -0.16310200 | 3.20146000 | 0.89140200  |
| N | -1.44189300 | 2.03995800 | -0.30856500 |
| C | -3.76629000 | 1.49031000 | -1.09475000 |
| C | -4.80027900 | 2.18546700 | -1.75481300 |
| C | -3.83167400 | 0.07353800 | -1.01162000 |
| C | -5.86598600 | 1.51740600 | -2.34726100 |
| H | -4.74875500 | 3.26539600 | -1.80983100 |

|    |             |             |             |
|----|-------------|-------------|-------------|
| C  | -4.91916400 | -0.57293000 | -1.62032100 |
| C  | -5.92494600 | 0.12728100  | -2.28466300 |
| H  | -6.64020400 | 2.08310600  | -2.85743100 |
| H  | -4.97945800 | -1.65487200 | -1.57263800 |
| H  | -6.74739500 | -0.41361900 | -2.74453500 |
| P  | -2.58058000 | -0.96574300 | -0.10303300 |
| Pd | -0.52582500 | 0.09849400  | 0.21056600  |
| C  | 0.29903600  | 3.61624700  | -1.15686300 |
| C  | 0.16240200  | 3.12144300  | -2.45882600 |
| C  | 1.36275900  | 4.48324800  | -0.86946600 |
| C  | 1.07206600  | 3.48718700  | -3.45387900 |
| H  | -0.64513100 | 2.43435000  | -2.69157000 |
| C  | 2.26792600  | 4.85360600  | -1.86433700 |
| H  | 1.48972800  | 4.85849900  | 0.14334600  |
| C  | 2.12516500  | 4.35486100  | -3.16126300 |
| H  | 0.95759600  | 3.08920300  | -4.45867500 |
| H  | 3.08959900  | 5.52312200  | -1.62437800 |
| H  | 2.83383100  | 4.63554200  | -3.93551100 |
| C  | -2.63191100 | -2.55375000 | -1.04257500 |
| C  | -3.41473200 | -3.65601700 | -0.66701500 |
| C  | -1.81415900 | -2.65777900 | -2.18038900 |
| C  | -3.38670000 | -4.83241000 | -1.42029300 |
| H  | -4.04362700 | -3.60022200 | 0.21639600  |
| C  | -1.79775900 | -3.82836700 | -2.93809300 |
| H  | -1.17858700 | -1.82169400 | -2.46162900 |
| C  | -2.58344100 | -4.91979400 | -2.55820900 |
| H  | -3.99406500 | -5.68039500 | -1.11493400 |
| H  | -1.16020700 | -3.89370800 | -3.81560300 |
| H  | -2.56137200 | -5.83642300 | -3.14123600 |
| C  | -3.44054200 | -1.35904200 | 1.48608400  |
| C  | -4.73571800 | -0.93164300 | 1.81212700  |
| C  | -2.71170300 | -2.09551000 | 2.43837900  |
| C  | -5.28971900 | -1.23611100 | 3.05911200  |
| H  | -5.31906500 | -0.36040600 | 1.09754600  |
| C  | -3.27286900 | -2.41212400 | 3.67400200  |
| H  | -1.70029500 | -2.41895700 | 2.20611700  |
| C  | -4.56385200 | -1.97848200 | 3.99017800  |
| H  | -6.29297600 | -0.89282800 | 3.29776100  |
| H  | -2.69843400 | -2.98855000 | 4.39424600  |
| H  | -4.99749500 | -2.21550200 | 4.95789400  |
| C  | 1.50950300  | 0.48499200  | 0.90363900  |
| C  | 1.21995100  | -0.90600400 | 1.06022500  |
| H  | 2.08545700  | 0.76222500  | 0.02026300  |
| H  | 1.02573800  | -1.30469000 | 2.05540600  |

|                                                    |                   |                    |                   |    |             |             |             |
|----------------------------------------------------|-------------------|--------------------|-------------------|----|-------------|-------------|-------------|
| C                                                  | 1.34928500        | -1.83747900        | 0.00498000        | Pd | 0.52161700  | -2.13492000 | 0.07650300  |
| C                                                  | 1.20105800        | -3.27756600        | 0.14014000        | P  | -1.53101000 | -0.98191300 | -0.28361900 |
| H                                                  | 1.65634900        | -1.45507900        | -0.96466500       | P  | 1.90261500  | -0.22350400 | 0.04315700  |
| H                                                  | 0.71452700        | -3.59701500        | 1.06752000        | C  | -2.53372600 | -2.00100000 | -1.46810400 |
| C                                                  | 1.65780300        | 1.41107100         | 2.04085100        | C  | -3.83963200 | -2.42842800 | -1.19203400 |
| C                                                  | 2.53666500        | 2.50817400         | 1.93455900        | C  | -4.51770100 | -3.26699200 | -2.08319300 |
| C                                                  | 0.95483200        | 1.25450500         | 3.25501800        | C  | -3.90734400 | -3.68308300 | -3.26508900 |
| C                                                  | 2.70928500        | 3.40419800         | 2.99007300        | C  | -2.60390000 | -3.26495700 | -3.55109300 |
| H                                                  | 3.09659900        | 2.64544300         | 1.01301100        | C  | -1.92135400 | -2.44335400 | -2.65605500 |
| C                                                  | 1.13086900        | 2.14756300         | 4.30922700        | C  | -2.69187700 | -0.64207700 | 1.10197200  |
| H                                                  | 0.25298200        | 0.43203400         | 3.36335000        | C  | -3.83534800 | 0.15477400  | 0.90990500  |
| C                                                  | 2.00793800        | 3.23014000         | 4.18499000        | C  | -4.73146000 | 0.36049900  | 1.95699800  |
| H                                                  | 3.40315900        | 4.23438900         | 2.88136800        | C  | -4.48996100 | -0.21820000 | 3.20725700  |
| H                                                  | 0.57721400        | 2.00034500         | 5.23337800        | C  | -3.35038700 | -0.99673400 | 3.40502200  |
| H                                                  | 2.14344400        | 3.92498800         | 5.00933200        | C  | -2.44803900 | -1.21326400 | 2.35851700  |
| H                                                  | 0.74647900        | -3.76174900        | -0.72997700       | C  | 2.20619600  | 0.56296400  | -1.59475500 |
| C                                                  | 4.90521900        | -3.16203600        | -0.95674700       | C  | 2.63137600  | 1.89385500  | -1.72807700 |
| C                                                  | 6.05829000        | -2.15528600        | -0.95149600       | C  | 2.92704700  | 2.42056400  | -2.98574300 |
| C                                                  | 6.29665300        | -1.37222500        | 0.19117400        | C  | 2.80732100  | 1.62275900  | -4.12598000 |
| C                                                  | 5.38749100        | -1.49779200        | 1.39878700        | C  | 2.38564300  | 0.29764800  | -4.00482300 |
| C                                                  | 4.54023400        | -2.78948600        | 1.33341300        | C  | 2.08428200  | -0.22754400 | -2.74688900 |
| H                                                  | 6.70945100        | -2.63033300        | -2.94616300       | C  | 3.61757200  | -0.48281900 | 0.69952200  |
| H                                                  | 5.36725300        | -4.17151400        | -0.84109400       | C  | 3.79096200  | -1.33925000 | 1.80279600  |
| C                                                  | 6.89858900        | -2.02051000        | -2.06350800       | C  | 5.06863900  | -1.57953300 | 2.31117600  |
| C                                                  | 7.37531000        | -0.47655500        | 0.18918100        | C  | 6.18872900  | -0.98853500 | 1.72316300  |
| H                                                  | 5.98205900        | -1.46689700        | 2.32391200        | C  | 6.02490900  | -0.14936800 | 0.62065700  |
| H                                                  | 3.77597800        | -2.75932500        | 2.12452800        | C  | 4.74953600  | 0.10433100  | 0.11120600  |
| C                                                  | 8.20679300        | -0.34613100        | -0.92244900       | H  | -4.33264000 | -2.11550800 | -0.27859600 |
| C                                                  | 7.96591400        | -1.12311600        | -2.05867200       | H  | -5.52732400 | -3.59215300 | -1.84654800 |
| H                                                  | 7.56286700        | 0.12506100         | 1.07740700        | H  | -4.43700700 | -4.33287200 | -3.95639000 |
| H                                                  | 9.03828600        | 0.35450900         | -0.90240700       | H  | -2.11542700 | -3.58735200 | -4.46700300 |
| H                                                  | 8.60516600        | -1.02942400        | -2.93367400       | H  | -0.90044300 | -2.14131300 | -2.87558400 |
| N                                                  | 3.89923100        | -2.92188700        | 0.04782000        | H  | -4.02674200 | 0.61112000  | -0.05793200 |
| H                                                  | 2.34064000        | -3.57299900        | 0.13694500        | H  | -5.61383100 | 0.97563800  | 1.80016400  |
| H                                                  | 4.43739000        | -3.16381700        | -1.95311900       | H  | -5.18745500 | -0.05306200 | 4.02457000  |
| H                                                  | 5.20988100        | -3.64793900        | 1.56616700        | H  | -3.14851100 | -1.43722500 | 4.37744300  |
| <u>H</u>                                           | <u>4.70633700</u> | <u>-0.63576800</u> | <u>1.43456900</u> | H  | -1.54555200 | -1.79782000 | 2.53089400  |
| 51                                                 |                   |                    |                   | H  | 2.72594400  | 2.52283200  | -0.84817100 |
| Zero-point correction= 0.697609 (Hartree/Particle) |                   |                    |                   | H  | 3.24282000  | 3.45627600  | -3.07413600 |
| Thermal correction to Energy= 0.742485             |                   |                    |                   | H  | 3.03774200  | 2.03455300  | -5.10490900 |
| Thermal correction to Enthalpy= 0.743429           |                   |                    |                   | H  | 2.28746900  | -0.32705600 | -4.88879300 |
| Thermal correction to Gibbs Free Energy= 0.618208  |                   |                    |                   | H  | 1.74558100  | -1.25585500 | -2.64931600 |
| E(Solv) = -3085.09196565                           |                   |                    |                   | H  | 2.92472200  | -1.81113500 | 2.26582700  |
|                                                    |                   |                    |                   | H  | 5.18230500  | -2.23860300 | 3.16775600  |



|    |             |             |             |
|----|-------------|-------------|-------------|
| H  | 7.18251400  | -1.18414900 | 2.11778300  |
| H  | 6.88969700  | 0.31130600  | 0.14998800  |
| H  | 4.64882200  | 0.75383100  | -0.75054400 |
| C  | 2.08296000  | -3.70853900 | -0.15907000 |
| H  | 2.25451000  | -3.90146400 | 0.89580500  |
| C  | 0.89314200  | -4.15147700 | -0.77428000 |
| C  | -0.28922600 | -4.21360900 | -0.00922500 |
| H  | 0.83134200  | -4.19414300 | -1.86064100 |
| C  | -1.37439400 | 0.66755800  | -1.14197800 |
| C  | -1.96722600 | 0.83591800  | -2.42650800 |
| C  | -0.65966700 | 1.72601200  | -0.57197900 |
| C  | -1.83903100 | 2.00453200  | -3.13387800 |
| C  | -0.51329800 | 2.95861800  | -1.30801500 |
| C  | -1.10312800 | 3.09191400  | -2.60642100 |
| C  | 1.11262800  | 1.04578600  | 1.14695300  |
| C  | 1.65205500  | 1.18221400  | 2.45640700  |
| C  | -0.08424600 | 1.69431800  | 0.82107500  |
| C  | 1.02494500  | 1.93438900  | 3.41632100  |
| C  | -0.76679800 | 2.46560700  | 1.82996600  |
| C  | -0.20060500 | 2.58485200  | 3.14097700  |
| H  | -2.30833800 | 2.10632200  | -4.10967600 |
| H  | -2.54221500 | 0.02601800  | -2.85687500 |
| H  | 2.57484600  | 0.67568700  | 2.70686500  |
| H  | 1.46156900  | 2.02437300  | 4.40776900  |
| C  | -0.86893500 | 3.35455700  | 4.13121000  |
| C  | -2.00219200 | 3.13190800  | 1.58158000  |
| H  | -0.41934800 | 3.42915400  | 5.11838300  |
| C  | -2.05740500 | 3.98677900  | 3.85190500  |
| H  | -2.56143600 | 4.57204600  | 4.61618900  |
| C  | -2.62821200 | 3.86772200  | 2.56237100  |
| H  | -3.57248100 | 4.35957200  | 2.34473500  |
| H  | -2.46137400 | 3.04919400  | 0.60396000  |
| C  | 0.21247600  | 4.07469100  | -0.79748200 |
| C  | -0.95076200 | 4.30398800  | -3.33243000 |
| C  | 0.34589400  | 5.23669800  | -1.52478600 |
| H  | -1.40944700 | 4.37989400  | -4.31549600 |
| C  | -0.24127000 | 5.35821000  | -2.80683900 |
| H  | 0.66784700  | 4.00620300  | 0.18311700  |
| H  | 0.90462200  | 6.07027600  | -1.10771200 |
| H  | -0.13179200 | 6.28187400  | -3.36857900 |
| Cl | 0.72329900  | -2.62561200 | 2.85267400  |
| H  | 2.95887200  | -3.49923800 | -0.76688900 |
| H  | -1.23799800 | -4.39054500 | -0.50637600 |
| H  | -0.24154300 | -4.41317200 | 1.05786400  |

52-ts

Zero-point correction= 0.768958 (Hartree/Particle)

Thermal correction to Energy= 0.817946

Thermal correction to Enthalpy= 0.818890

Thermal correction to Gibbs Free Energy= 0.681021

E(Solv) = -3311.36988456

|    |             |             |             |
|----|-------------|-------------|-------------|
| Pd | -1.03644900 | 0.62914600  | -1.20243700 |
| P  | 0.61369800  | 1.93673000  | -0.11688400 |
| P  | 0.10163200  | -1.44181900 | -0.98584900 |
| C  | 0.75425800  | 3.59934100  | -0.92071700 |
| C  | 0.85256100  | 4.80394100  | -0.20997700 |
| C  | 0.91291700  | 6.02515700  | -0.88737100 |
| C  | 0.88377000  | 6.06160500  | -2.28128800 |
| C  | 0.78008900  | 4.86801000  | -3.00085600 |
| C  | 0.70392400  | 3.65061300  | -2.32554700 |
| C  | 0.28598500  | 2.27528700  | 1.66018400  |
| C  | 1.25293100  | 2.86822800  | 2.49283200  |
| C  | 0.96577000  | 3.11688800  | 3.83411000  |
| C  | -0.28044200 | 2.76181300  | 4.36284600  |
| C  | -1.23492600 | 2.15277900  | 3.54931500  |
| C  | -0.95457500 | 1.91114100  | 2.20159200  |
| C  | 1.63221100  | -1.72127200 | -1.98464200 |
| C  | 2.49159000  | -2.80862700 | -1.76419800 |
| C  | 3.58317900  | -3.02837200 | -2.60257400 |
| C  | 3.82601000  | -2.17051700 | -3.67880600 |
| C  | 2.97335400  | -1.09134700 | -3.91202700 |
| C  | 1.88201200  | -0.86898400 | -3.06925200 |
| C  | -0.75410400 | -3.06170900 | -1.26925500 |
| C  | -1.63303300 | -3.13509600 | -2.36086400 |
| C  | -2.24962300 | -4.33923400 | -2.70407500 |
| C  | -2.00313700 | -5.48933500 | -1.95272600 |
| C  | -1.12926100 | -5.42965200 | -0.86552900 |
| C  | -0.50351200 | -4.22805300 | -0.52928900 |
| H  | 0.87008500  | 4.79623000  | 0.87419600  |
| H  | 0.98095600  | 6.94898800  | -0.31899600 |
| H  | 0.93111600  | 7.01266500  | -2.80482100 |
| H  | 0.74384000  | 4.88565800  | -4.08697600 |
| H  | 0.59128900  | 2.72801900  | -2.88999800 |
| H  | 2.23257000  | 3.12331400  | 2.09648100  |
| H  | 1.71746200  | 3.57877700  | 4.46949600  |
| H  | -0.49616800 | 2.94808400  | 5.41183100  |
| H  | -2.19664200 | 1.83569600  | 3.94130700  |
| H  | -1.70520800 | 1.40257700  | 1.60378200  |

H 2.30836300 -3.48896100 -0.93788000  
H 4.24541800 -3.86930100 -2.41569000  
H 4.67600100 -2.34574200 -4.33290500  
H 3.15483500 -0.42195400 -4.74883400  
H 1.21517700 -0.02934700 -3.24825600  
H -1.82937100 -2.24121000 -2.94731700  
H -2.92707100 -4.37600900 -3.55311400  
H -2.49033800 -6.42570600 -2.21068000  
H -0.93211500 -6.32048900 -0.27498500  
H 0.16892900 -4.19926100 0.32204900  
C -2.59001500 2.07832500 -1.38944800  
H -2.95137700 2.28571700 -0.38352800  
C -3.05641900 0.91430000 -2.06555100  
H -3.04684600 0.88460800 -3.15387700  
C -3.60744700 -0.19089800 -1.36581000  
C 2.35650100 1.27103500 -0.14090400  
C 2.68353000 0.05117700 0.46656500  
C 3.36064400 1.99488800 -0.84214000  
C 4.03110000 -0.44515000 0.37890900  
C 4.64943300 1.53007400 -0.93610600  
H 3.10831800 2.94207600 -1.30396000  
C 5.02253800 0.30410000 -0.33573200  
C 0.56083700 -1.42644600 0.80410900  
C -0.36794800 -1.93151600 1.70216200  
C 1.69806700 -0.70584500 1.31355000  
C -0.19657700 -1.84216700 3.10594100  
C 1.89583200 -0.66005000 2.68344900  
C 0.98851900 -1.22713200 3.61139900  
H 2.76605200 -0.13437400 3.06828900  
H -3.53638000 -0.23960300 -0.28018300  
H -1.28101500 -2.39433100 1.34197300  
C 1.19242100 -1.16937000 5.01599900  
C -1.16457000 -2.34210000 4.01828800  
H 2.09767000 -0.70365600 5.39822600  
C 0.25011200 -1.68563800 5.87722700  
H 0.41029000 -1.63604200 6.95112100  
C -0.94199500 -2.26687900 5.37474500  
H -1.68830300 -2.64350700 6.06860600  
H -2.09026400 -2.75265800 3.62647500  
H 5.40070000 2.10754100 -1.46994800  
C 4.43149200 -1.68076900 0.96610000  
C 6.35185600 -0.19067800 -0.42283900  
H 3.69759900 -2.26938000 1.50393300  
H 7.08880200 0.39671400 -0.96558500

C 5.72726800 -2.13569800 0.86265900  
C 6.70241200 -1.38392000 0.16435600  
H 6.00402000 -3.08146200 1.32102000  
H 7.72224700 -1.75226600 0.09306600  
C -7.44889400 0.34371600 0.03252000  
C -7.83598000 0.41645300 -1.30132500  
C -6.65435500 0.18947200 -2.02579000  
N -5.63338800 -0.01166000 -1.18556200  
H -8.01030100 0.45276000 0.94929100  
H -8.82610600 0.60474000 -1.68975600  
H -6.49355100 0.16141600 -3.09515500  
N -6.12747400 0.08834600 0.05901800  
H -5.46541800 -0.01758200 0.87961300  
Cl -3.96020000 -0.21538800 2.16311000  
H -2.32927900 2.95868100 -1.97217000  
H -3.69767900 -1.14232900 -1.87545700

53

Zero-point correction= 0.769109 (Hartree/Particle)

Thermal correction to Energy= 0.818739

Thermal correction to Enthalpy= 0.819684

Thermal correction to Gibbs Free Energy= 0.679806

E(Solv) = -3311.38810101

Pd -1.15227100 0.21688300 -1.05650700  
P 0.36311700 1.91818400 -0.35139800  
P 0.27784900 -1.63855600 -0.74864000  
C 0.28167200 3.40183300 -1.46061000  
C 0.41746400 4.72264700 -1.00814000  
C 0.31964000 5.79271600 -1.90111300  
C 0.09220000 5.56004600 -3.25824000  
C -0.04815400 4.24916200 -3.72037500  
C 0.03557500 3.18135000 -2.82670500  
C 0.09818500 2.61864000 1.33387400  
C 1.11303800 3.28069100 2.04685000  
C 0.85061700 3.82306100 3.30525300  
C -0.42543400 3.71021000 3.86664500  
C -1.43721000 3.05137700 3.16781200  
C -1.17577000 2.50518700 1.90897600  
C 1.75824100 -1.81616900 -1.84656000  
C 2.85554000 -2.63610800 -1.54302200  
C 3.89661100 -2.79418800 -2.45665900  
C 3.85195800 -2.14210200 -3.69181200  
C 2.76473200 -1.32642200 -4.00604900  
C 1.72545900 -1.16318200 -3.08721600  
C -0.36783600 -3.38144200 -0.82279800

|   |             |             |             |
|---|-------------|-------------|-------------|
| C | -1.46916500 | -3.61208100 | -1.66061400 |
| C | -1.96803700 | -4.90312300 | -1.85218100 |
| C | -1.37871200 | -5.98425600 | -1.19652000 |
| C | -0.28287300 | -5.76848200 | -0.35685800 |
| C | 0.22281200  | -4.48066400 | -0.17726500 |
| H | 0.59052600  | 4.92049200  | 0.04461000  |
| H | 0.41928900  | 6.81008500  | -1.53168000 |
| H | 0.01522500  | 6.39452800  | -3.95028300 |
| H | -0.23719800 | 4.05834000  | -4.77369700 |
| H | -0.10474600 | 2.16359700  | -3.18292700 |
| H | 2.10932700  | 3.36739100  | 1.62114800  |
| H | 1.64290000  | 4.33338300  | 3.84781300  |
| H | -0.62549800 | 4.13230000  | 4.84829700  |
| H | -2.43498200 | 2.94570600  | 3.58337700  |
| H | -1.97600600 | 1.98725200  | 1.39054000  |
| H | 2.90669400  | -3.14668700 | -0.58623100 |
| H | 4.74567700  | -3.42281900 | -2.20222800 |
| H | 4.66369400  | -2.26834000 | -4.40342200 |
| H | 2.72442500  | -0.81382800 | -4.96369500 |
| H | 0.87942400  | -0.52336300 | -3.32585200 |
| H | -1.92600900 | -2.76632300 | -2.16807400 |
| H | -2.81707800 | -5.06294100 | -2.51222400 |
| H | -1.76837800 | -6.98890700 | -1.33747800 |
| H | 0.18290600  | -6.60572200 | 0.15657400  |
| H | 1.07357700  | -4.33283500 | 0.48075900  |
| C | -3.00274300 | 1.23818100  | -1.42465600 |
| H | -3.36255500 | 1.73792200  | -0.52647800 |
| C | -3.22208100 | -0.14960600 | -1.59698900 |
| H | -3.29304000 | -0.55408800 | -2.60789700 |
| C | -3.95325500 | -0.94785000 | -0.54368700 |
| C | 2.17525800  | 1.47385300  | -0.36185100 |
| C | 2.66419900  | 0.39070100  | 0.37754200  |
| C | 3.06626500  | 2.20951100  | -1.19339700 |
| C | 4.06132300  | 0.04813900  | 0.29855600  |
| C | 4.39753700  | 1.88818200  | -1.28696900 |
| H | 2.68628600  | 3.05062700  | -1.76103200 |
| C | 4.93363300  | 0.80496200  | -0.55083900 |
| C | 0.88007000  | -1.42179900 | 0.98914500  |
| C | 0.20178300  | -2.08752200 | 1.99891900  |
| C | 1.81892500  | -0.38819900 | 1.35207800  |
| C | 0.40640700  | -1.81322400 | 3.37456700  |
| C | 2.02300000  | -0.11706700 | 2.69381600  |
| C | 1.34261600  | -0.79755000 | 3.73378500  |
| H | 2.73761800  | 0.65493800  | 2.96661600  |

|          |                    |                    |                    |
|----------|--------------------|--------------------|--------------------|
| H        | -3.73772200        | -0.58065200        | 0.46231400         |
| H        | -0.53341800        | -2.84517500        | 1.74601800         |
| C        | 1.55797900         | -0.50928200        | 5.10765200         |
| C        | -0.28808700        | -2.50700700        | 4.40210300         |
| H        | 2.26896400         | 0.26823100         | 5.37604100         |
| C        | 0.87221800         | -1.19931800        | 6.08243500         |
| H        | 1.03944700         | -0.97064300        | 7.13144600         |
| C        | -0.05979200        | -2.20658700        | 5.72635000         |
| H        | -0.59778300        | -2.73899900        | 6.50590800         |
| H        | -1.00595900        | -3.27542800        | 4.12524400         |
| H        | 5.05725200         | 2.47085800         | -1.92594000        |
| C        | 4.63046200         | -1.03878400        | 1.02537100         |
| C        | 6.31013000         | 0.46197400         | -0.63451100        |
| H        | 3.99490400         | -1.63022700        | 1.67375000         |
| H        | 6.95217100         | 1.05384200         | -1.28281200        |
| C        | 5.96844900         | -1.34921800        | 0.92163500         |
| C        | 6.82279900         | -0.59181400        | 0.08524800         |
| H        | 6.37256600         | -2.18339300        | 1.48928800         |
| H        | 7.87738500         | -0.84438800        | 0.01504900         |
| C        | -7.42164300        | 0.00403500         | -0.39580000        |
| C        | -7.55269300        | -1.00664600        | -1.35286300        |
| C        | -6.27045800        | -1.52635900        | -1.50613100        |
| N        | -5.44137900        | -0.85918100        | -0.68055500        |
| H        | -8.15333500        | 0.66591400         | 0.04419400         |
| H        | -8.45186500        | -1.32296800        | -1.85917800        |
| H        | -5.89402400        | -2.31629800        | -2.13955700        |
| N        | -6.14204000        | 0.07693700         | -0.01657700        |
| H        | -5.64113000        | 0.69999900         | 0.79857400         |
| Cl       | -4.81439000        | 1.55383900         | 2.06647300         |
| H        | -2.89644700        | 1.88082600         | -2.29695100        |
| <u>H</u> | <u>-3.72165300</u> | <u>-2.01525200</u> | <u>-0.58922900</u> |

54

Zero-point correction= 0.697245 (Hartree/Particle)

Thermal correction to Energy= 0.742266

Thermal correction to Enthalpy= 0.743210

Thermal correction to Gibbs Free Energy= 0.613327

E(Solv) = -3085.06730844

|    |             |             |             |
|----|-------------|-------------|-------------|
| Pd | 1.80179200  | 0.89040600  | -0.33438800 |
| P  | 1.11880400  | -1.37945200 | -0.20282900 |
| P  | -0.31829600 | 1.88011300  | 0.07287200  |
| C  | 2.22791400  | -2.60199800 | -1.05920000 |
| C  | 2.38277100  | -3.94043000 | -0.66686800 |
| C  | 3.25893300  | -4.78593000 | -1.35112900 |

|   |             |             |             |    |             |             |             |
|---|-------------|-------------|-------------|----|-------------|-------------|-------------|
| C | 3.98878400  | -4.31227600 | -2.44247200 | C  | -1.59347600 | -2.19918300 | -3.18857400 |
| C | 3.84518300  | -2.98235400 | -2.84309000 | C  | -2.88016000 | -1.01963300 | -1.46962300 |
| C | 2.98015600  | -2.13413200 | -2.15067400 | C  | -2.81526800 | -1.62283100 | -2.76773100 |
| C | 0.91447800  | -2.12269400 | 1.47176200  | C  | -1.44689200 | 0.84703400  | 1.14473900  |
| C | 0.13117500  | -3.25798500 | 1.73151000  | C  | -1.74098500 | 1.32090400  | 2.45639700  |
| C | 0.07432200  | -3.80229900 | 3.01508400  | C  | -1.88672800 | -0.42790200 | 0.76412900  |
| C | 0.80079000  | -3.22054200 | 4.05647100  | C  | -2.43788800 | 0.56264000  | 3.36263800  |
| C | 1.57868300  | -2.08766300 | 3.81178300  | C  | -2.62986300 | -1.23135800 | 1.70506500  |
| C | 1.63153400  | -1.54041700 | 2.52862700  | C  | -2.89788900 | -0.73095000 | 3.02054400  |
| C | -1.32248300 | 2.33244000  | -1.40565000 | H  | -1.53996300 | -2.67165900 | -4.16672600 |
| C | -2.70144500 | 2.58982700  | -1.35322300 | H  | 0.42881400  | -2.62777100 | -2.72569900 |
| C | -3.39326400 | 2.98182400  | -2.49992200 | H  | -1.40862200 | 2.30962700  | 2.74765100  |
| C | -2.71695900 | 3.11954800  | -3.71417500 | H  | -2.65034400 | 0.95491200  | 4.35454500  |
| C | -1.34718200 | 2.85901000  | -3.77940000 | C  | -3.62518300 | -1.52618700 | 3.94699300  |
| C | -0.65470200 | 2.46514800  | -2.63302000 | C  | -3.12442900 | -2.53006800 | 1.38455800  |
| C | -0.18689500 | 3.48267500  | 1.00126800  | H  | -3.81333700 | -1.12238600 | 4.93905500  |
| C | 0.83441900  | 3.58864900  | 1.96206700  | C  | -4.08487800 | -2.77478200 | 3.59997300  |
| C | 1.01147000  | 4.76237400  | 2.69427800  | H  | -4.64320200 | -3.37379400 | 4.31423700  |
| C | 0.18273400  | 5.86289600  | 2.46223800  | C  | -3.82925700 | -3.27734300 | 2.30191200  |
| C | -0.82353900 | 5.77674600  | 1.49963300  | H  | -4.19472800 | -4.26267300 | 2.02478300  |
| C | -1.01106300 | 4.59536000  | 0.77730700  | H  | -2.94295400 | -2.93637000 | 0.39682300  |
| H | 1.83195300  | -4.32740400 | 0.18341800  | C  | -4.13106400 | -0.46671400 | -1.06629900 |
| H | 3.37117500  | -5.81726700 | -1.02667100 | C  | -3.96935400 | -1.64844600 | -3.59646100 |
| H | 4.67181200  | -4.97182900 | -2.97106700 | C  | -5.23442700 | -0.50911500 | -1.88927300 |
| H | 4.41681700  | -2.59943300 | -3.68431200 | H  | -3.89153900 | -2.11194800 | -4.57714600 |
| H | 2.88881300  | -1.09312300 | -2.44779500 | C  | -5.15848600 | -1.10535300 | -3.17022900 |
| H | -0.44580500 | -3.71235000 | 0.93173600  | H  | -4.21496800 | -0.00557200 | -0.08976000 |
| H | -0.54532200 | -4.67487500 | 3.20266500  | H  | -6.17383200 | -0.08023200 | -1.55044400 |
| H | 0.75467700  | -3.64528400 | 5.05573700  | H  | -6.03662100 | -1.13295700 | -3.80961000 |
| H | 2.14079600  | -1.62585300 | 4.61918600  | Cl | 6.56783600  | 1.22959900  | 0.08907500  |
| H | 2.22670600  | -0.65101600 | 2.33776000  | C  | 3.90597200  | 1.22853600  | -0.79613300 |
| H | -3.23729300 | 2.47888400  | -0.41489100 | C  | 3.23374400  | 2.46294400  | -0.66262400 |
| H | -4.46182600 | 3.17199600  | -2.44624200 | C  | 4.78142900  | 0.67080700  | 0.27069600  |
| H | -3.25791400 | 3.42233600  | -4.60680500 | H  | 4.12648600  | 0.86299500  | -1.79846400 |
| H | -0.81681100 | 2.95705100  | -4.72292100 | H  | 3.35573800  | 3.05627100  | 0.24278800  |
| H | 0.40976100  | 2.25102700  | -2.68247000 | H  | 2.97871400  | 3.04287300  | -1.54750800 |
| H | 1.49865700  | 2.74381200  | 2.12523800  | H  | 4.85141500  | -0.41609000 | 0.24462800  |
| H | 1.80545000  | 4.82196900  | 3.43402800  | H  | 4.49871500  | 1.00674700  | 1.26873900  |
| H | 0.32699300  | 6.78325800  | 3.02179000  |    |             |             |             |
| H | -1.46731800 | 6.63090600  | 1.30602800  |    |             |             |             |
| H | -1.79683300 | 4.55033000  | 0.03092300  |    |             |             |             |
| C | -0.51830100 | -1.57395700 | -1.08176000 |    |             |             |             |
| C | -0.48985100 | -2.17397100 | -2.37453300 |    |             |             |             |
| C | -1.71049900 | -0.99566200 | -0.62366100 |    |             |             |             |
